# Supplementary material
Source: PubMed Central journal article supplement (PMC7042857)
Supplement: jamadermatol-156-421-s001.pdf [file jamadermatol-156-421-s001.pdf]

## Online Content

Vaengebjerg S, Skov L, Egeberg A, Loft ND. Prevalence, incidence, and risk of cancer in patients with psoriasis and psoriatic arthritis: a systematic review and meta-analysis. *JAMA Dermatol*. Published online February 19, 2020.  
doi:10.1001/jamadermatol.2020.0024

**eFigure 1.** PRISMA Flowchart

**eFigure 2.** Funnel Plots for Prevalence of Cancer and Skin Cancer

**eFigure 3.** Funnel Plots for Prevalence of Lymphomas

**eFigure 4.** Funnel Plots for Prevalence of Solid Cancers

**eFigure 5.** Funnel Plots for Prevalence of Cancers in Patients Receiving Biological Treatment for Psoriasis

**eFigure 6.** Funnel Plots for Prevalence of Cancers in Patients With Psoriatic Arthritis

**eFigure 7.** Funnel Plots for Incidence of Cancer and Skin Cancer

**eFigure 8.** Funnel Plots for Incidence of Lymphomas

**eFigure 9.** Funnel Plots for Incidence of Solid Cancers

**eFigure 10.** Funnel Plots for Incidence of Cancers in Patients Receiving Biological Treatment for Psoriasis

**eFigure 11.** Funnel Plots for Incidence of Cancers in Patients With Psoriatic Arthritis

**eFigure 12.** Funnel Plots for Risk Ratio of Cancer and Skin Cancer

**eFigure 13.** Funnel Plots for Risk Ratio of Lymphomas

**eFigure 14.** Funnel Plots for Risk Ratio of Solid Cancers

**eFigure 15.** Funnel Plots for Risk Ratio of Cancer in Patients Receiving Biological Treatment

**eFigure 16.** Funnel Plots for Risk Ratio of Cancer in Patients With Psoriatic Arthritis

**eTable 1.** Overview of All Included Studies

**eReferences.**

**eTable 2.** Newcastle Ottawa Scale

**eTable 3.** Egger Bias of Prevalence According to Different Cancer Types

**eTable 4.** Egger Bias of Incidence According to Different Cancer Types

**eTable 5.** Egger Bias of Risk Estimates According to Different Cancer Types

**eTable 6.** Prevalence and Quality Assessment According to Different Cancer Types—Sensitivity Analysis—Year of Publication

**eTable 7.** Incidence and Quality Assessment According to Different Cancer Types—Sensitivity Analysis—Year of Publication

**eTable 8.** Risk Estimates and Quality Assessment According to Different Cancer Types—Sensitivity Analysis—Year of Publication

**eTable 9.** Risk Estimates and Quality Assessment According to Different Cancer Types—Sensitivity Analysis—High Quality

This supplementary material has been provided by the authors to give readers additional information about their work.

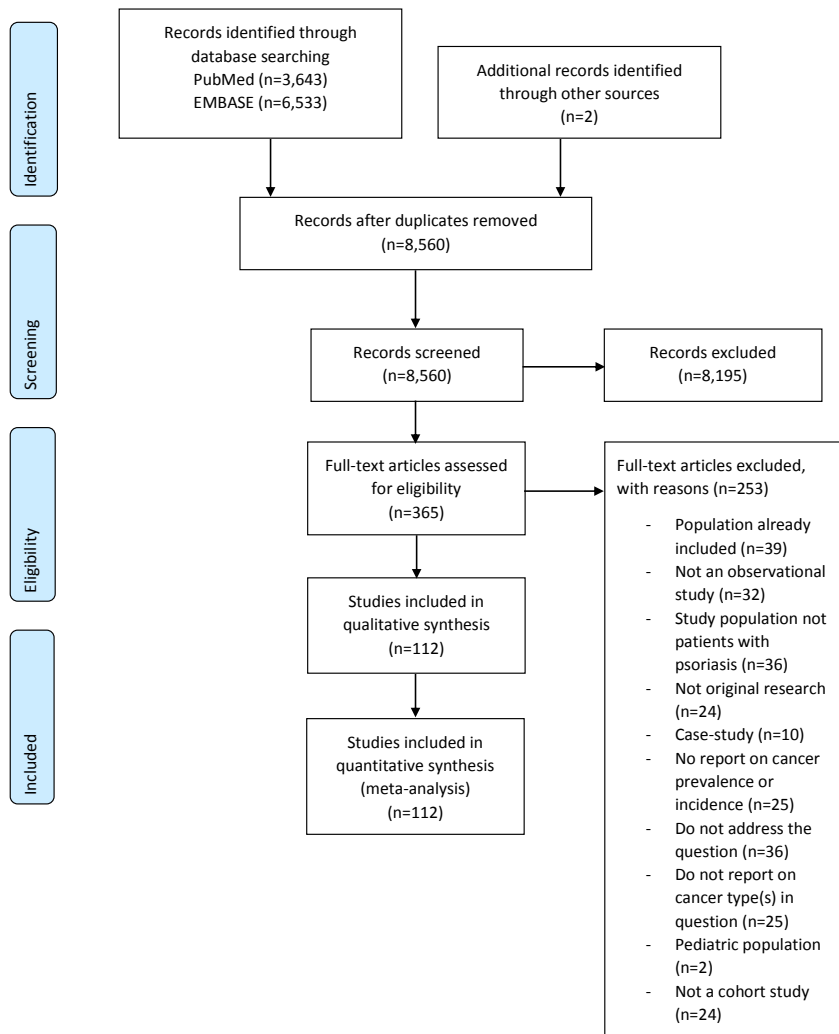

Figure 1: PRISMA flowchart for selection of included studies.

**eFigure 2 – funnel plots for prevalence of cancer and skin cancer**

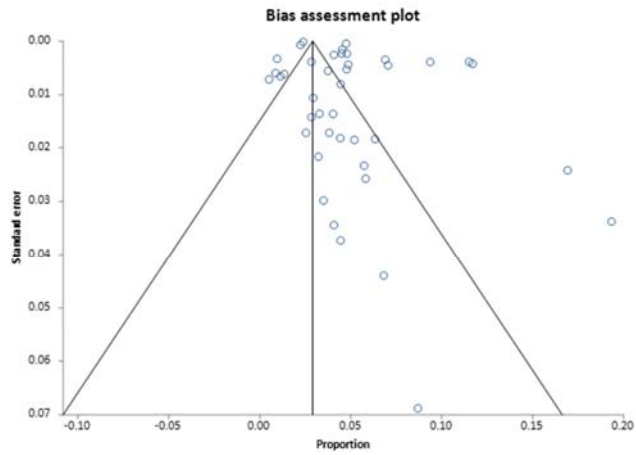

**a**

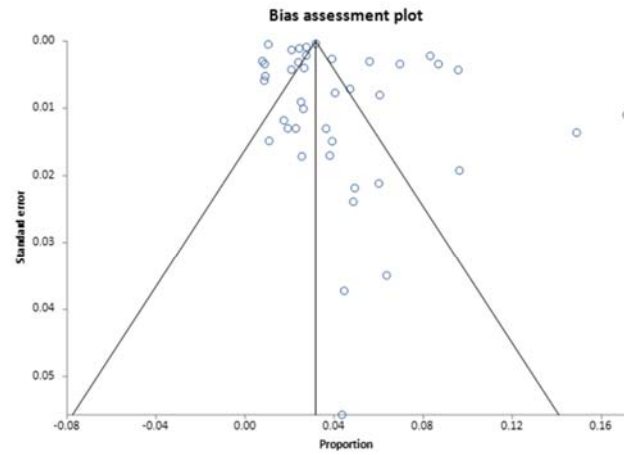

**b**

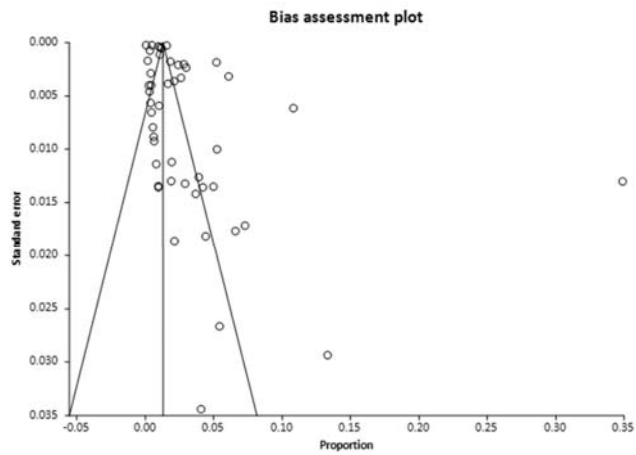

**c**

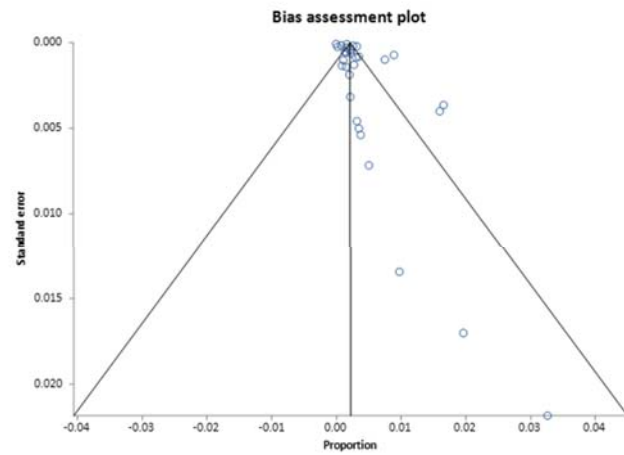

**d**

*eFigure 2: Funnel plots for prevalence of (a) cancer overall, (b) cancer excluding keratinocyte cancer, (c) keratinocyte cancer, (d) melanoma.*

**eFigure 3 – funnel plots for prevalence of lymphomas**

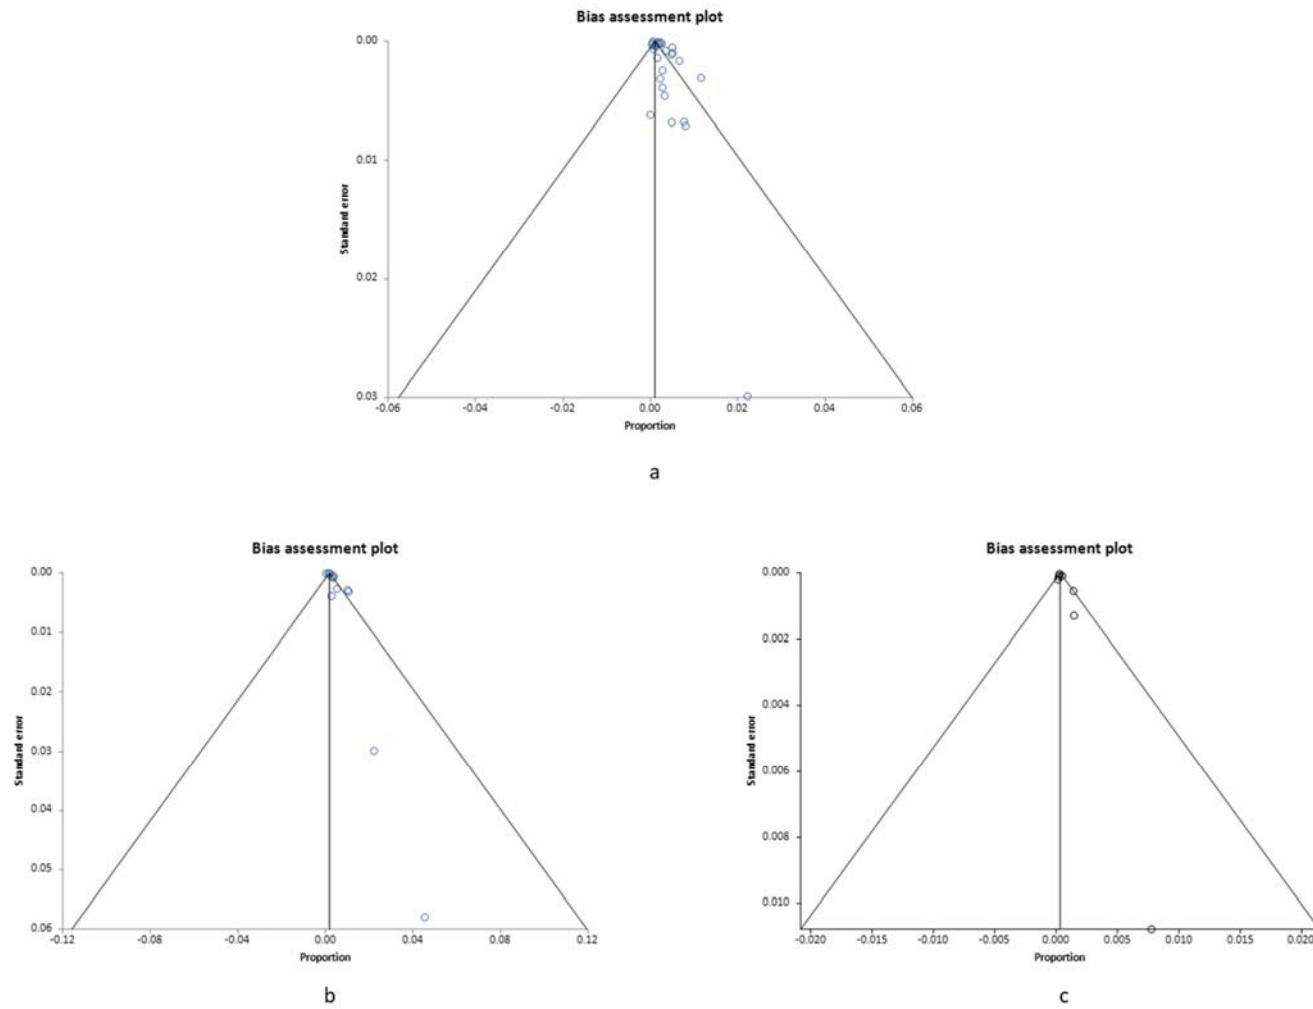

*eFigure 3: Funnel plots for prevalence of (a) lymphoma overall, (b) non-Hodgkin's lymphoma, (c) Hodgkin's lymphoma.*

**eFigure 4 – funnel plots for prevalence of solid cancers**

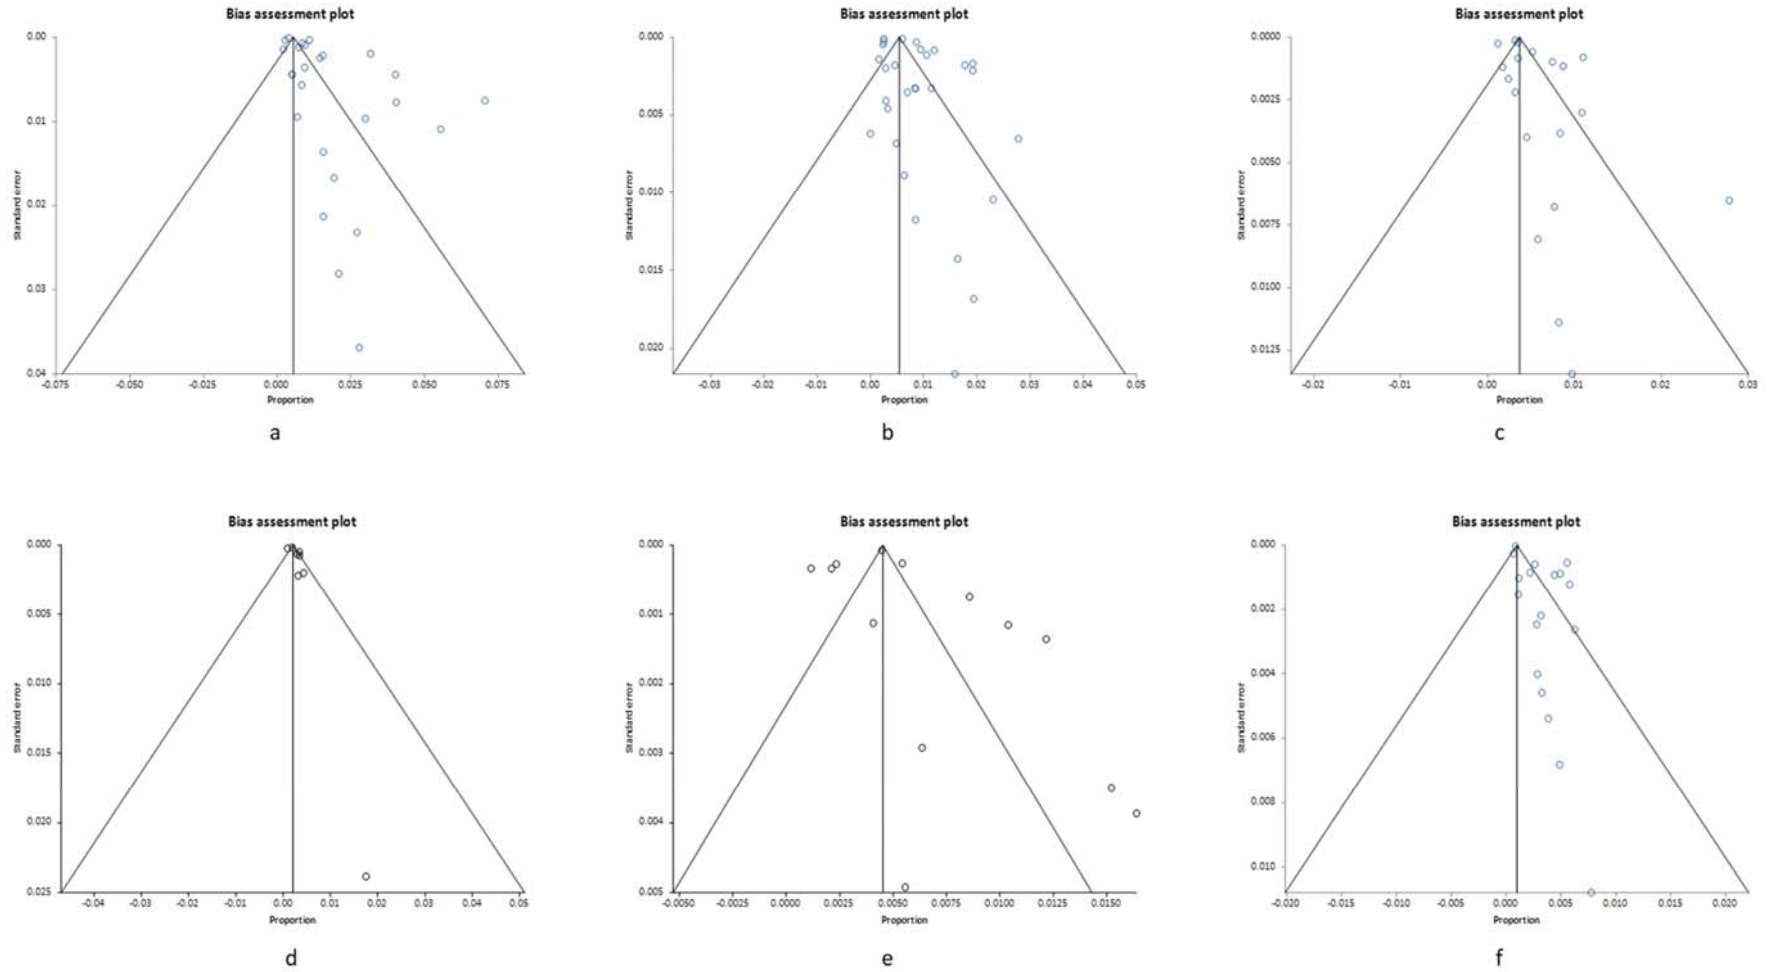

*eFigure 4: Funnel plots for prevalence of (a) breast cancer, (b) lung cancer, (c) colon cancer, (d) rectal cancer, (e) colorectal cancer, (f) bladder cancer.*

**eFigure 5 – funnel plots for prevalence of cancers in patients receiving biological treatment for psoriasis**

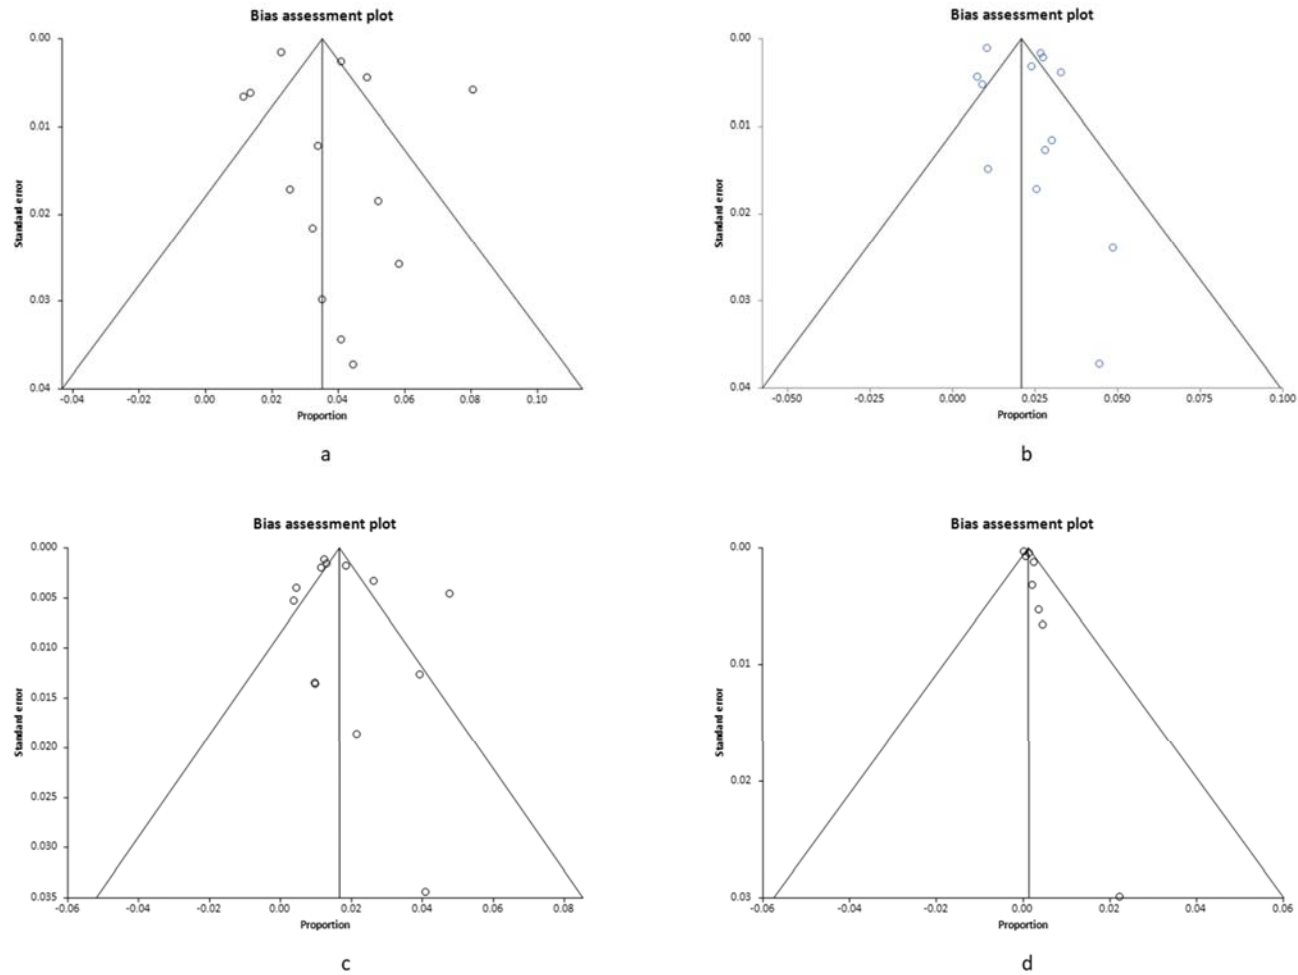

*eFigure 5: Funnel plots for prevalence of (a) cancer overall – bio, (b) cancer excluding keratinocyte cancer – bio, (c) keratinocyte cancer – bio (d) lymphoma overall – bio. Bio = Biological treatment.*

**eFigure 6 – funnel plots for prevalence of cancers in patients with psoriatic arthritis**

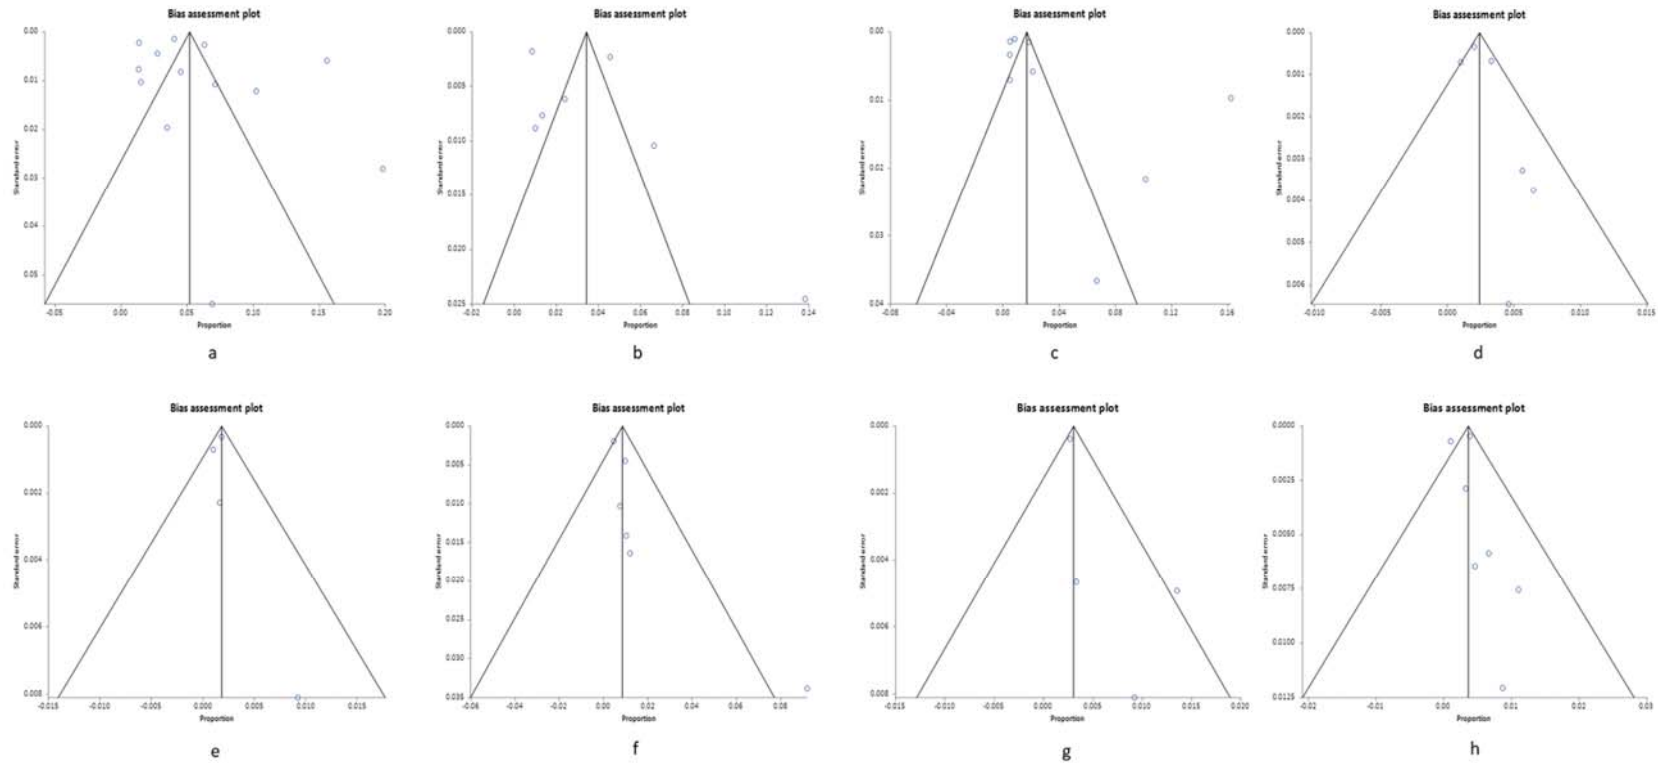

*eFigure 6: Funnel plots for prevalence of (a) cancer overall – PsA, (b) cancer minus keratinocyte cancer – PsA, (c) keratinocyte cancer – PsA, (d) melanoma – PsA, (e) lymphoma overall – PsA, (f) breast cancer – PsA, (g) lung cancer – PsA, (h) colorectal cancer – PsA. PsA = Psoriatic arthritis.*

**eFigure 7 – funnel plots for incidence of cancer and skin cancer**

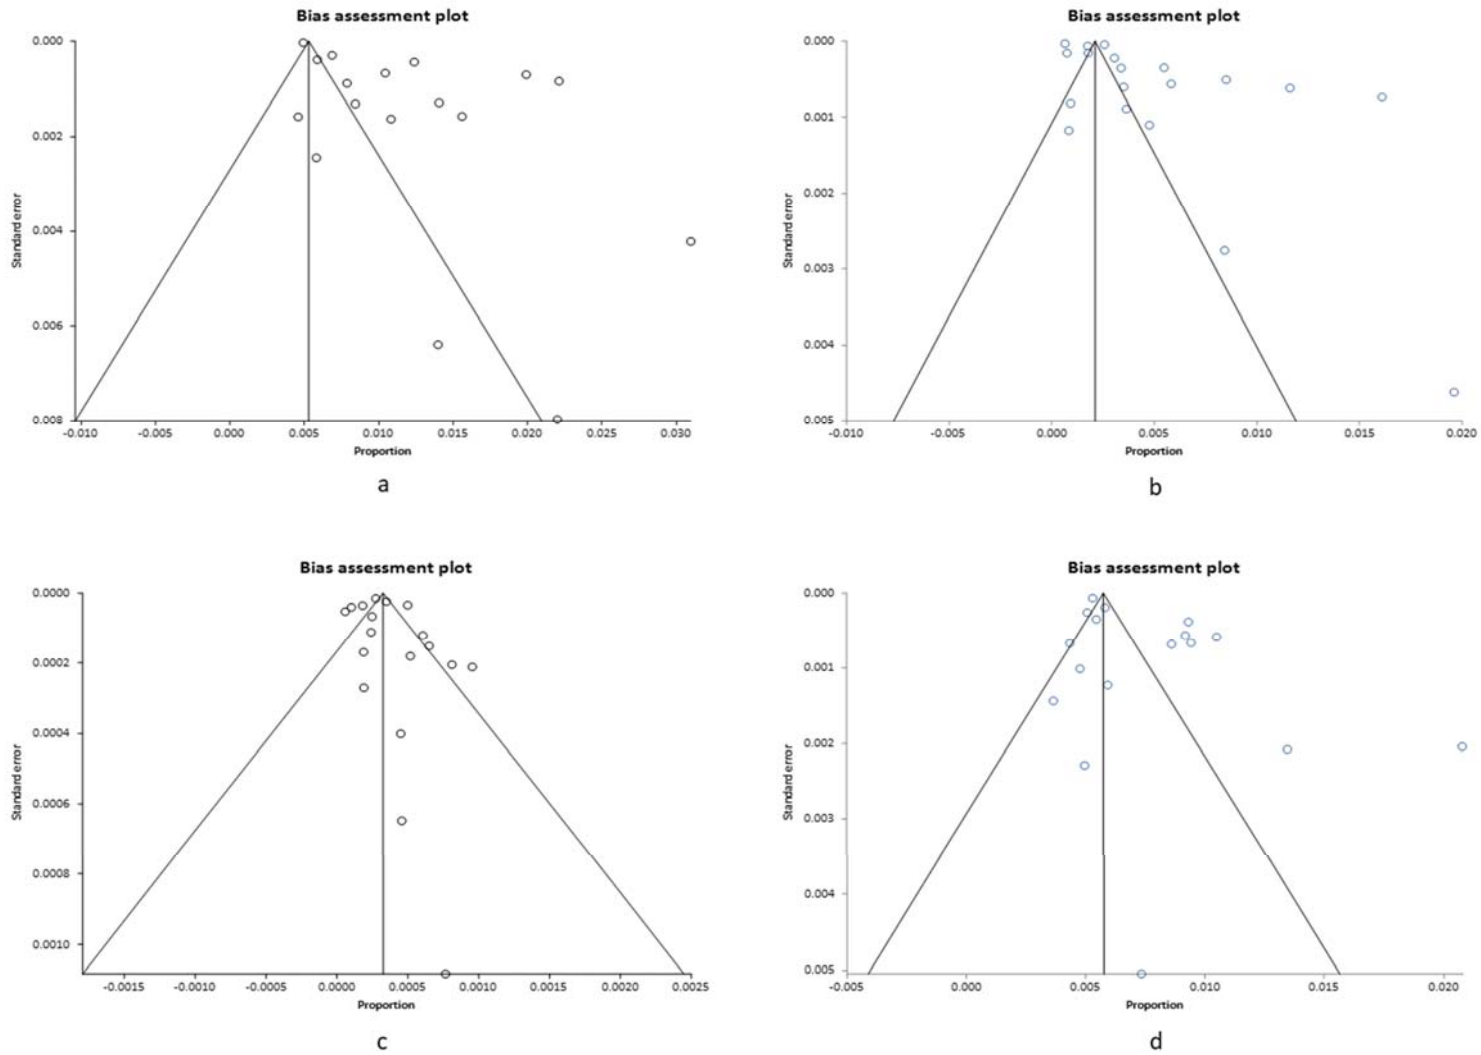

*eFigure 7: Funnel plots for incidence of (a) cancer overall, (b) cancer excluding keratinocyte cancer, (c) keratinocyte cancer, (d) melanoma.*



**eFigure 8 – funnel plots for incidence of lymphomas**

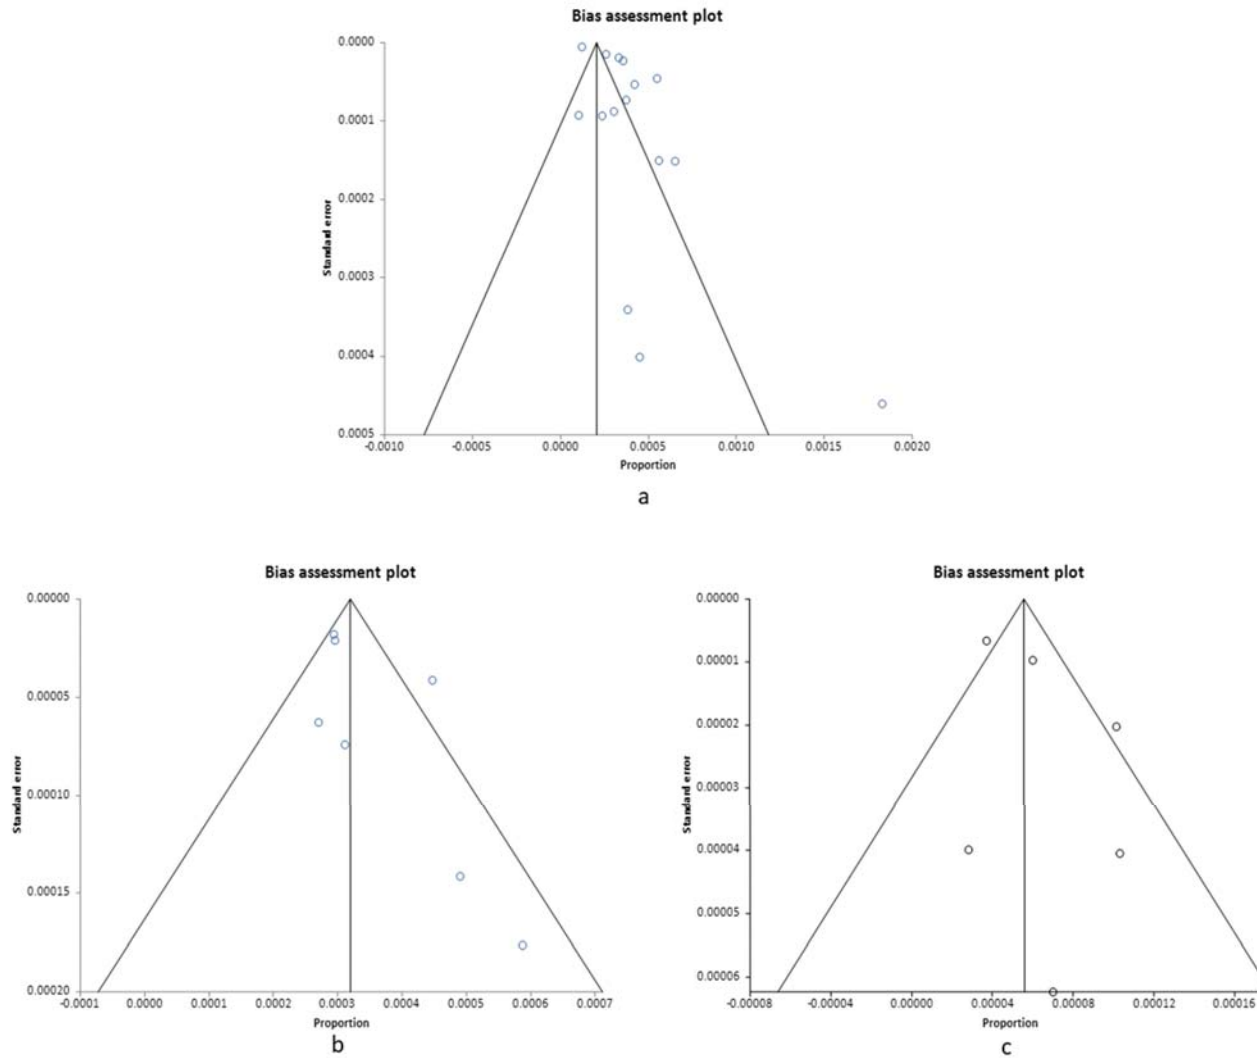

*eFigure 8: Funnel plots for incidence of (a) lymphoma overall, (b) non-Hodgkin's lymphoma, (c) Hodgkin's lymphoma.*

**eFigure 9 – funnel plots for incidence of solid cancers**

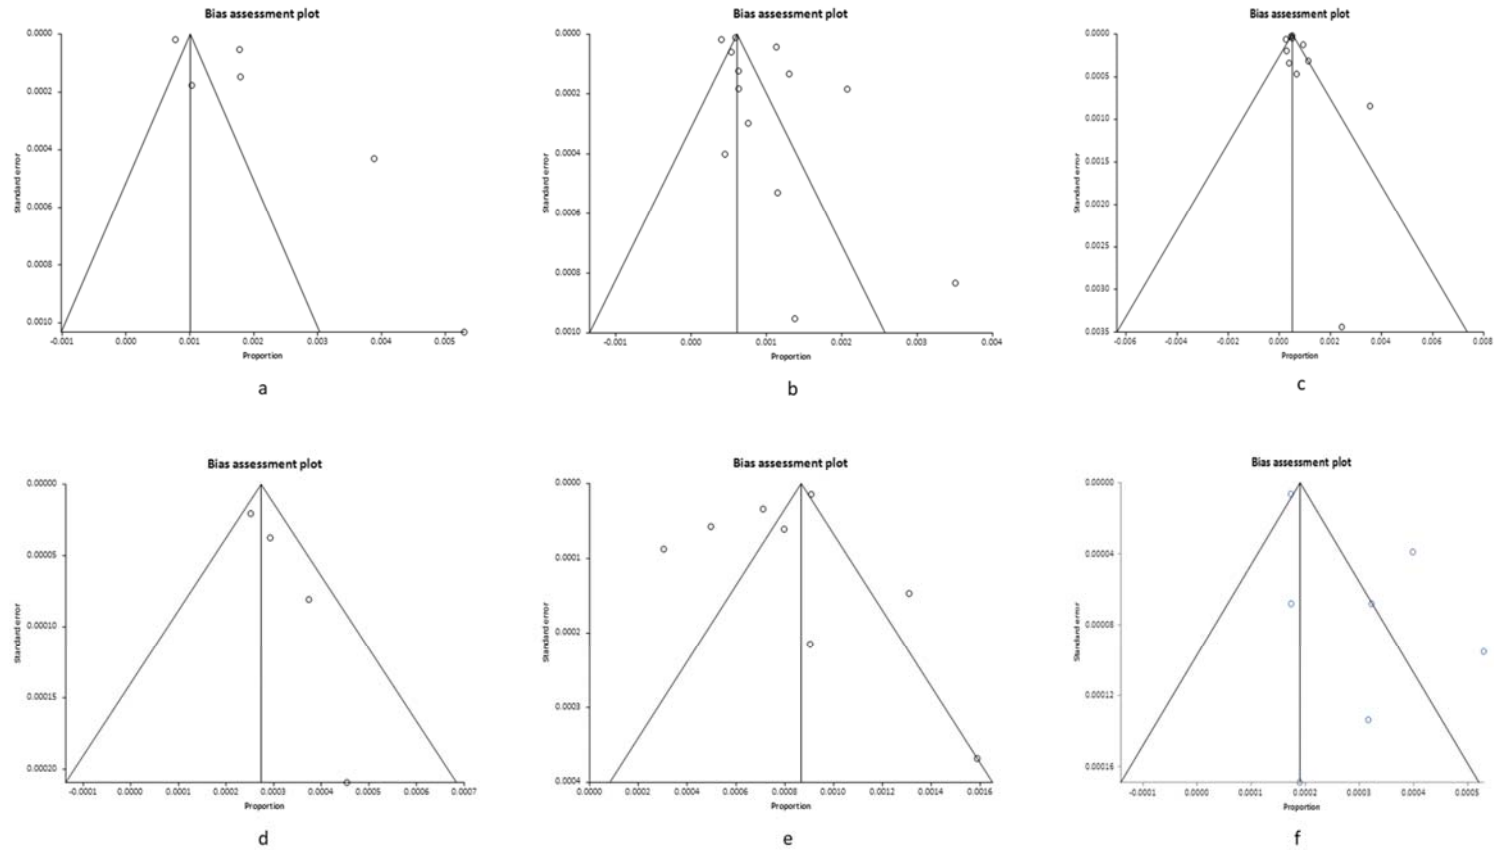

*eFigure 9: Funnel plots for incidence of (a) breast cancer, (b) lung cancer, (c) colon cancer, (d) rectal cancer, (e) colorectal cancer, (f) bladder cancer.*

**eFigure 10 – funnel plots for incidence of cancers in patients receiving biological treatment for psoriasis**

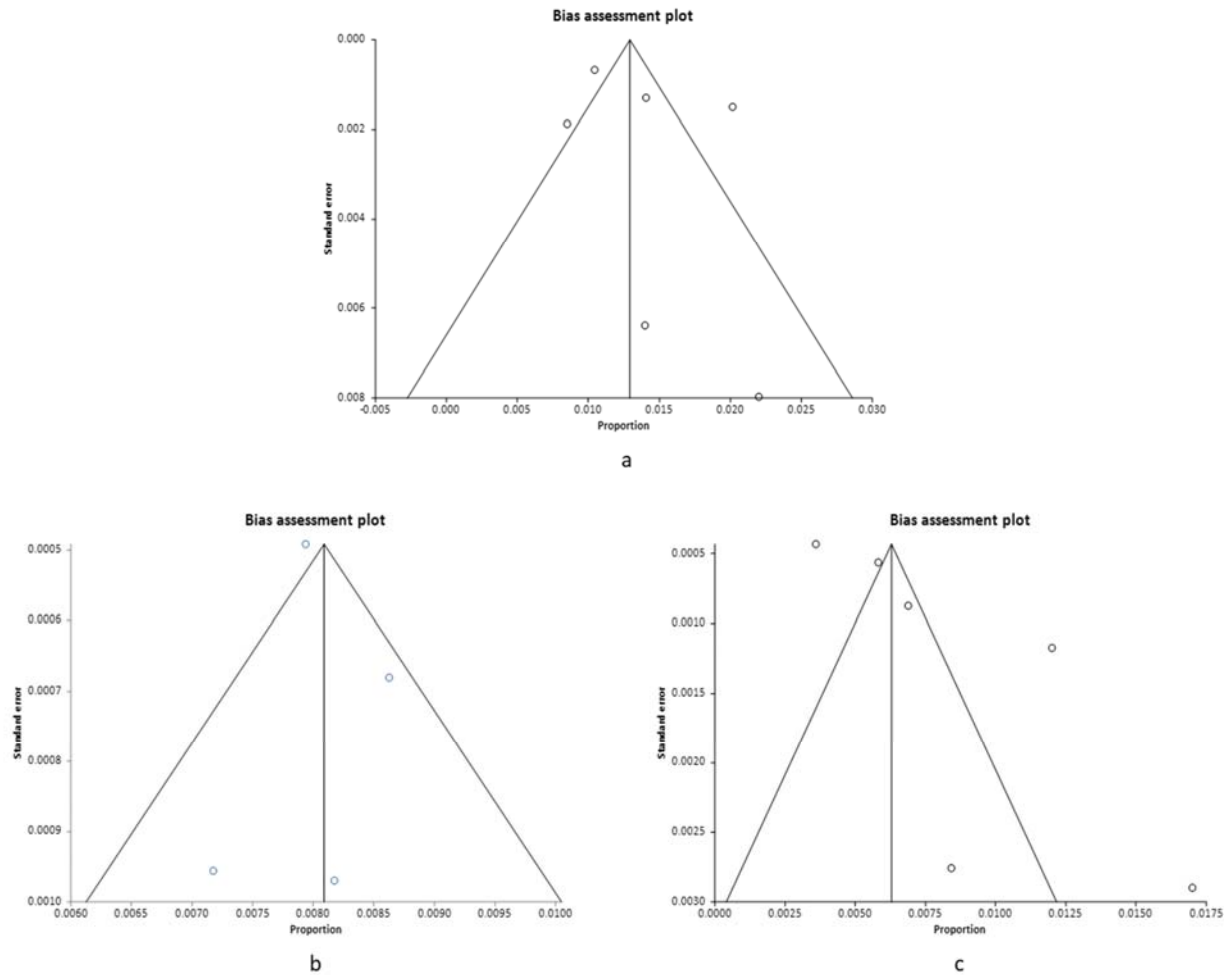

*eFigure 10: Funnel plots for incidence of (a) cancer overall – bio, (b) cancer excluding keratinocyte cancer – bio, (c) keratinocyte cancer – bio. No funnel plot is shown for lymphoma overall due to lack of data. Bio = biological treatment.*

**eFigure 11 – funnel plots for incidence of cancers in patients with psoriatic arthritis**

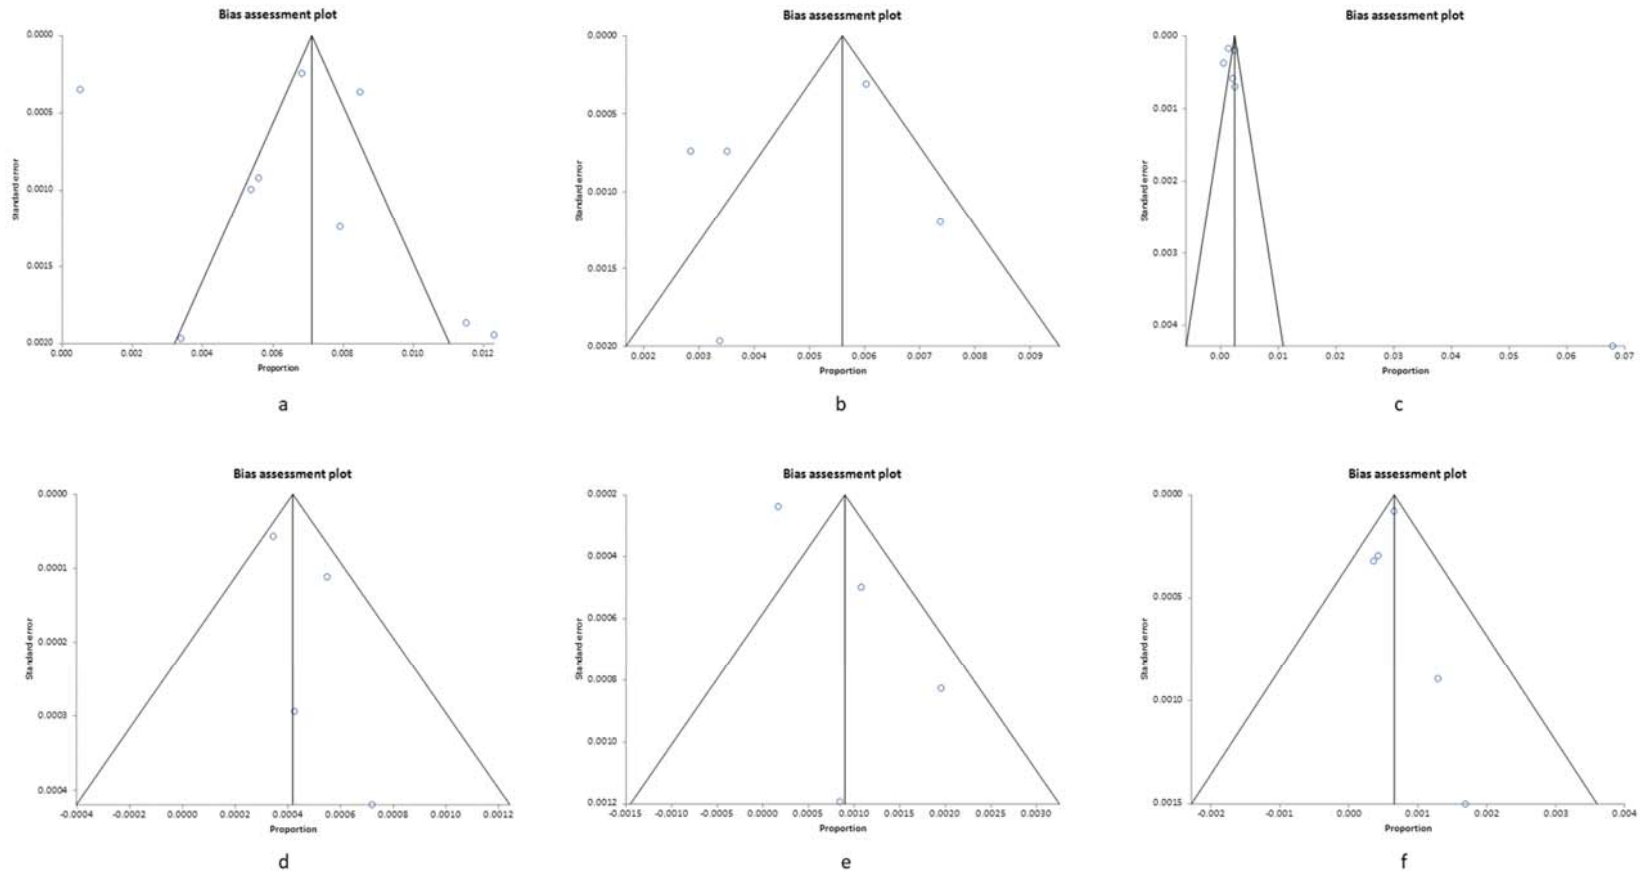

*eFigure 11: Funnel plots for incidence of (a) cancer overall – PsA, (b) cancer excluding keratinocyte cancer – PsA, (c) keratinocyte cancer – PsA, (d) melanoma – PsA, (e) breast cancer – PsA, (f) colorectal cancer – PsA. No funnel plots are shown for lymphoma overall or lung cancer due to lack of data. PsA = Psoriatic arthritis.*

**eFigure 12 – funnel plots for risk ratio of cancer and skin cancer**

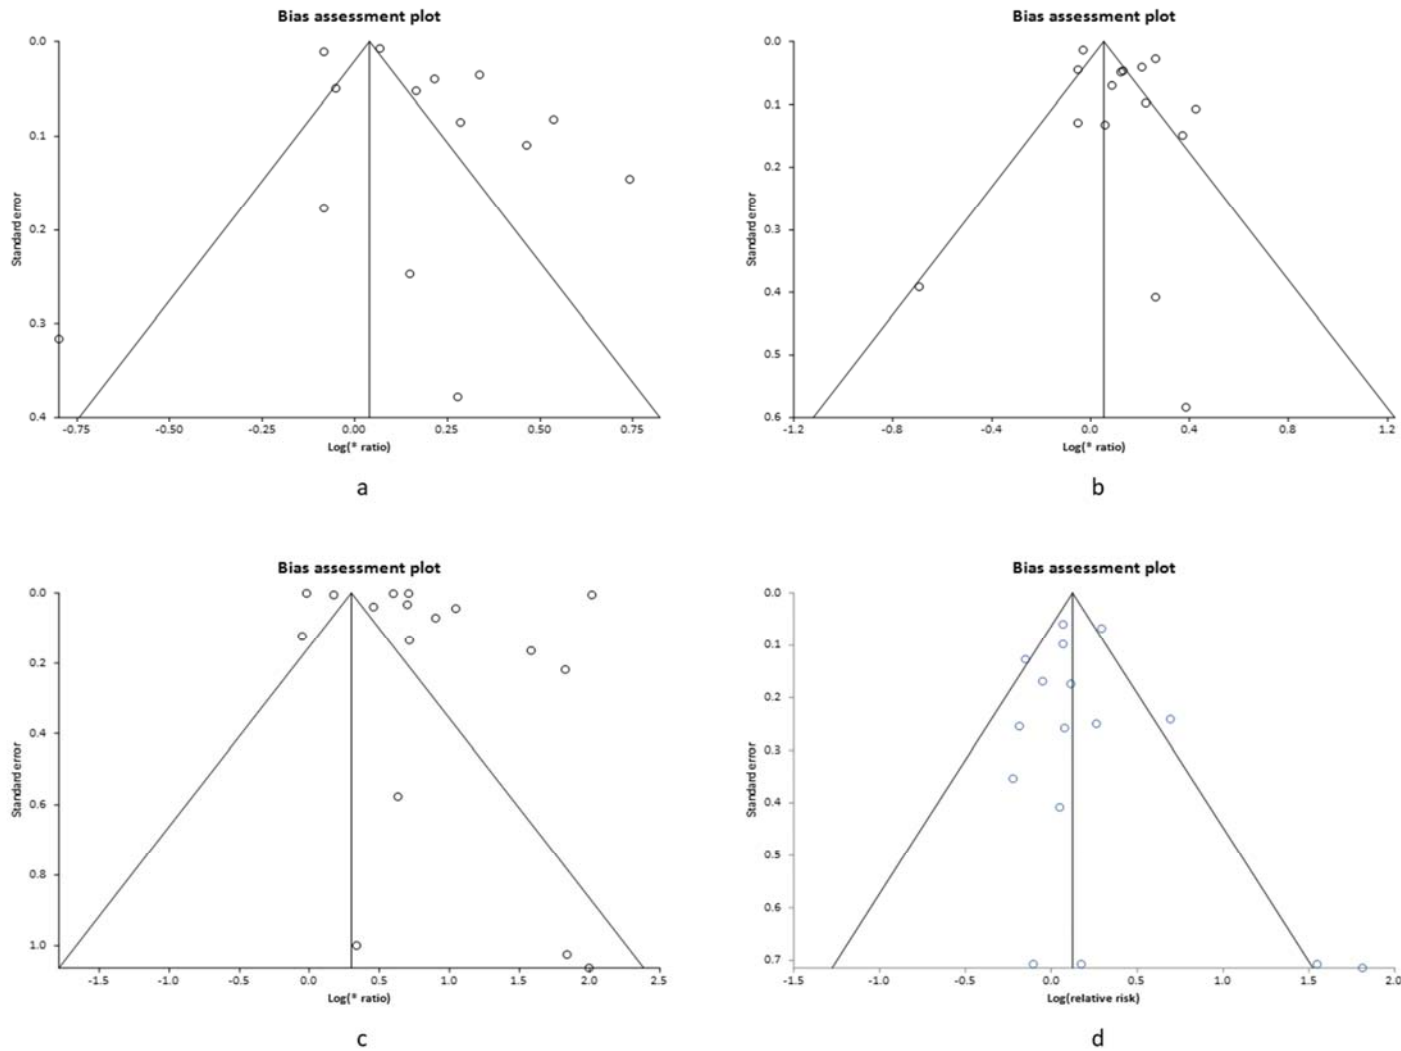

*eFigure 12: Funnel plots for risk ratio of (a) cancer overall, (b) cancer excluding keratinocyte cancer, (c) keratinocyte cancer, (d) melanoma.*

**eFigure 13 – funnel plots for risk ratio of lymphomas**

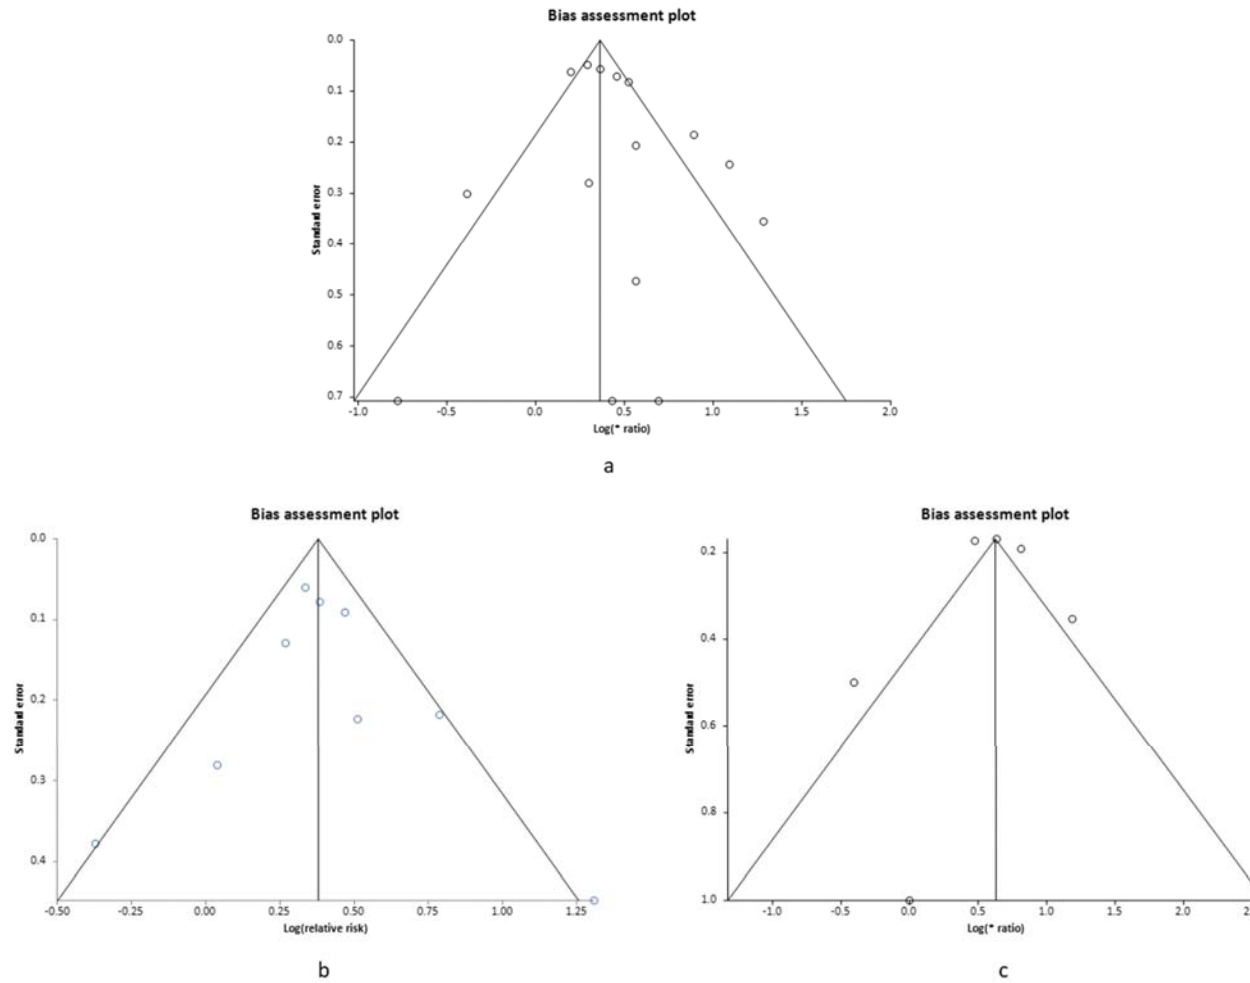

*eFigure 13: Funnel plots for risk ratio of (a) lymphoma overall, (b) non-Hodgkin's lymphoma, (c) Hodgkin's lymphoma.*

**eFigure 14 – funnel plots for risk ratio of solid cancers**

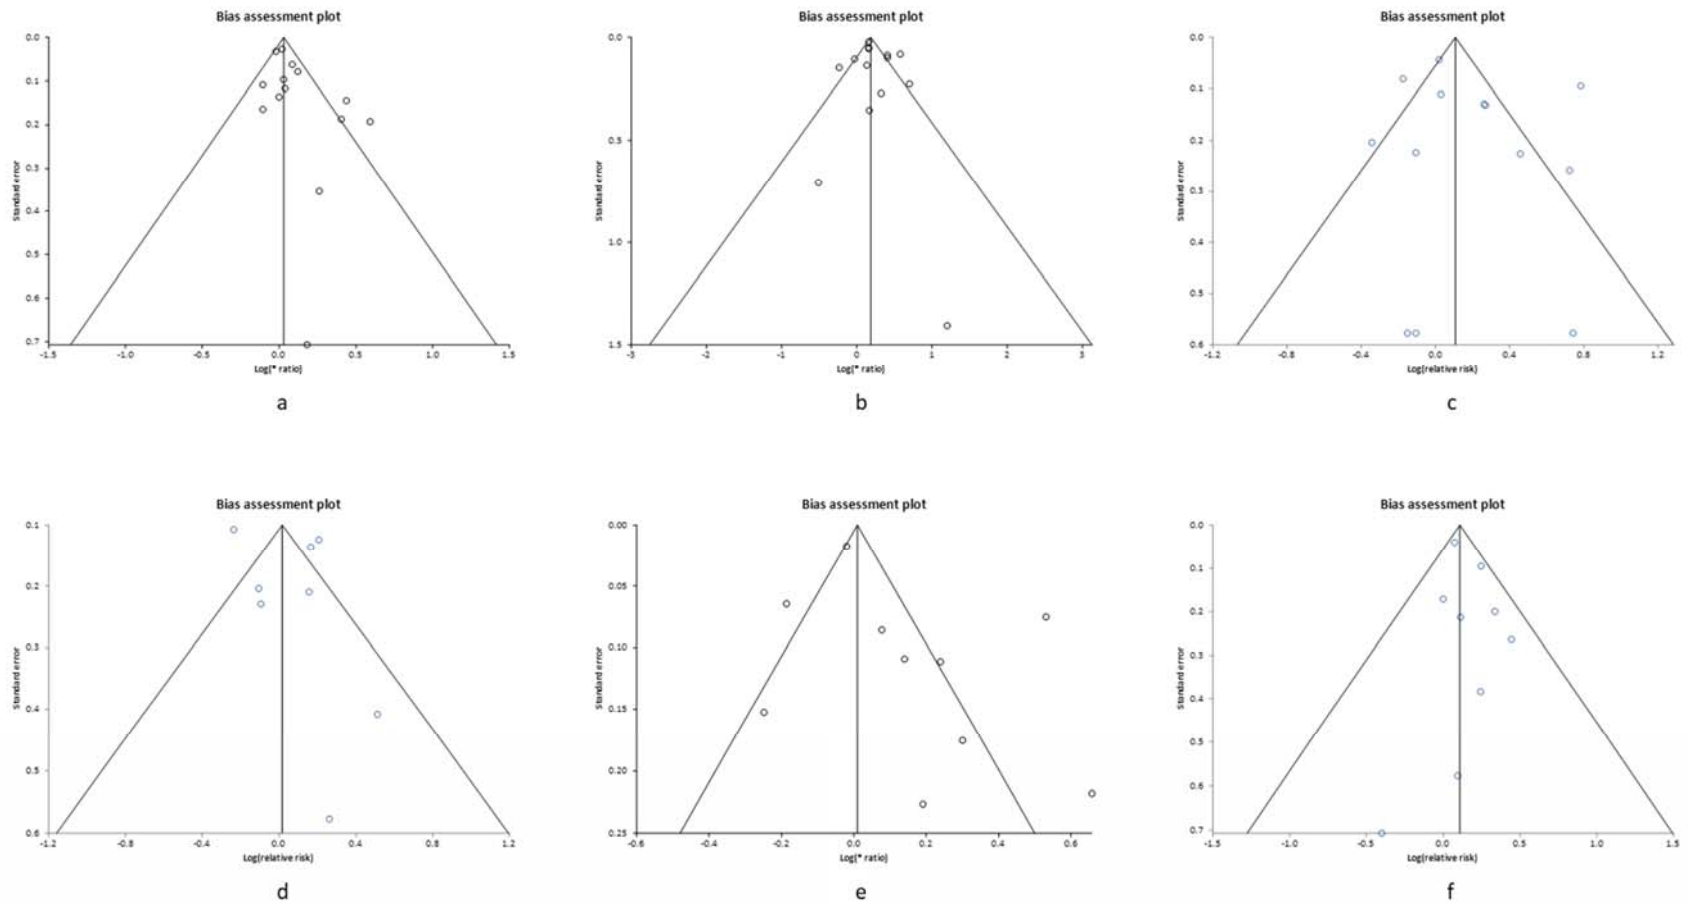

*eFigure 14: Funnel plots for risk ratio of (a) breast cancer, (b) lung cancer, (c) colon cancer, (d) rectal cancer, (e) colorectal cancer, (f) bladder cancer.*

**eFigure 15 – funnel plots for risk ratio of cancer in patients receiving biological treatment**

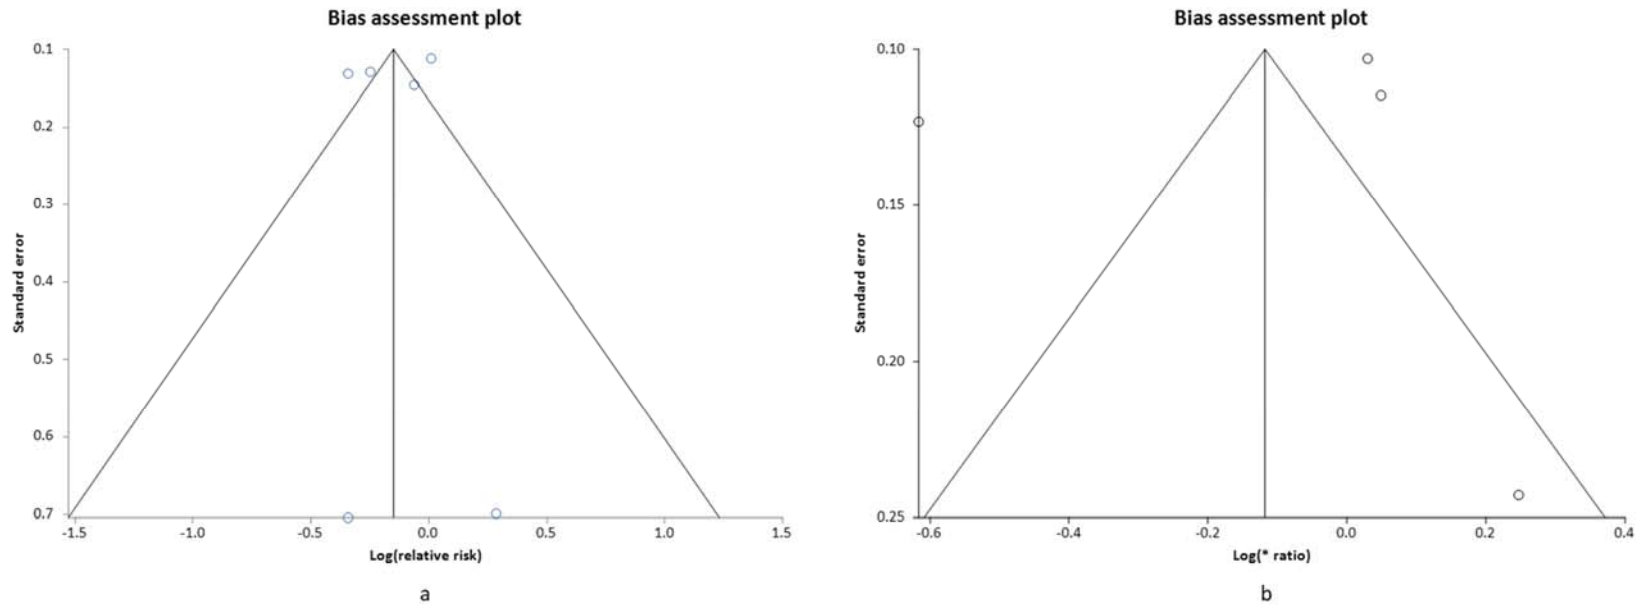

*eFigure 15: Funnel plots for risk ratio of (a) cancer excluding keratinocyte cancer – bio, (b) keratinocyte cancer – bio. No funnel plots are shown for cancer overall and lymphoma overall due to lack of data. Bio = Biological treatment.*



**eFigure 16 – funnel plots for risk ratio of cancer in patients with psoriatic arthritis**

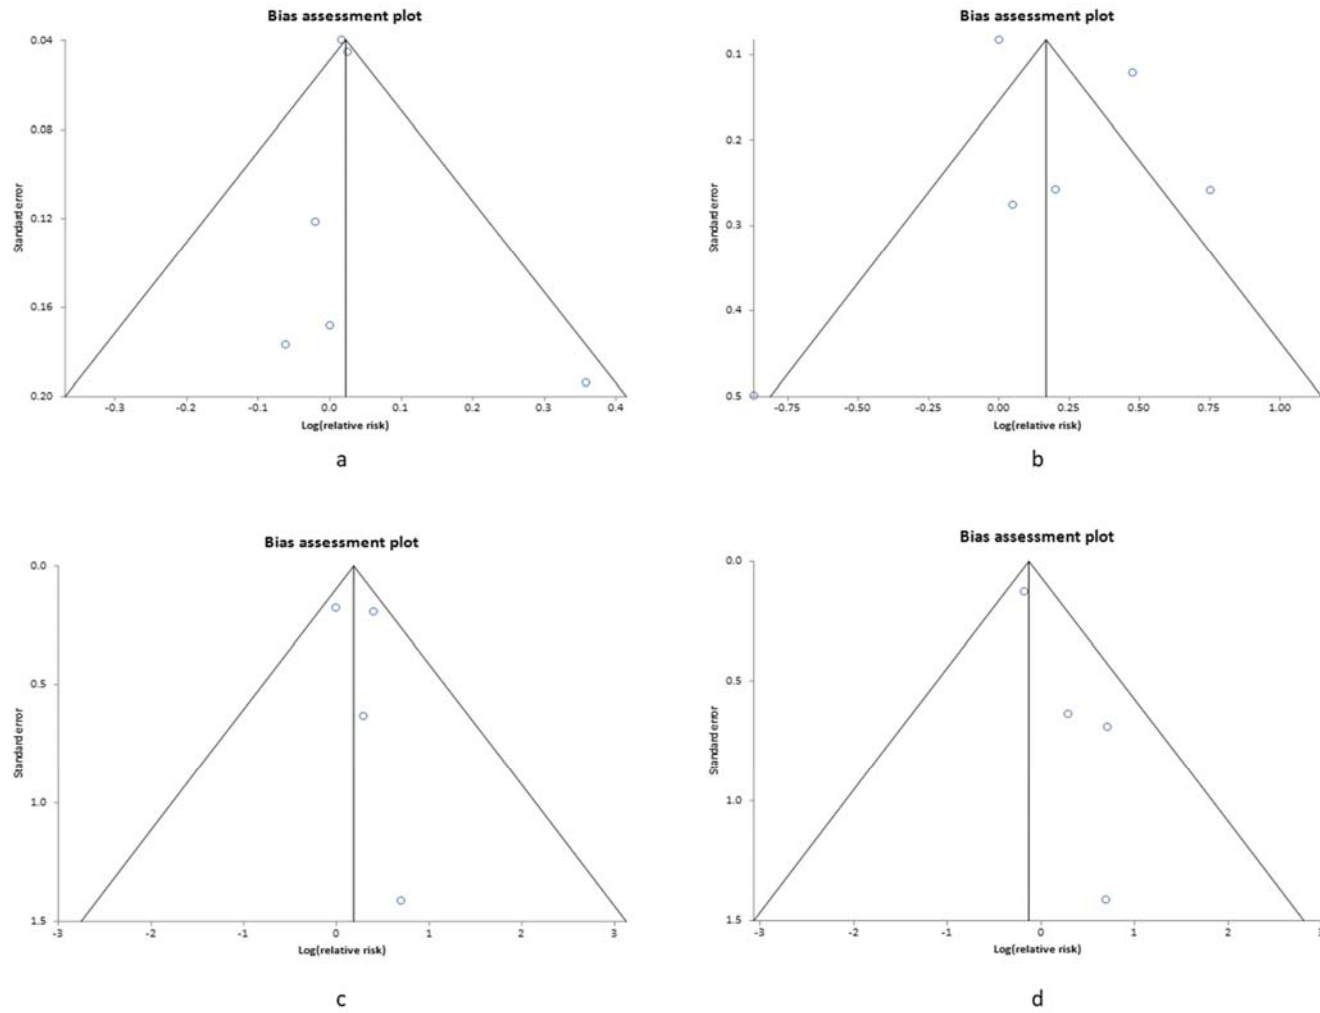

*eFigure 16: Funnel plots for risk ratio of (a) cancer overall – PsA, (b) keratinocyte cancer – PsA, (c) melanoma – PsA, (d) colorectal cancer – PsA. No funnel plots are show for cancer excluding keratinocyte cancer, lymphoma overall, breast cancer and lung cancer due to lack of data. PsA = Psoriatic arthritis.*

**eTable 1 – Overview of all included studies**

| table 1a. Details of studies included in analysis for cancer overall in patients with psoriasis |                                                                                           |                                                                |                                                                  |                                                           |                                                                      |                          |                           |                                               |
|-------------------------------------------------------------------------------------------------|-------------------------------------------------------------------------------------------|----------------------------------------------------------------|------------------------------------------------------------------|-----------------------------------------------------------|----------------------------------------------------------------------|--------------------------|---------------------------|-----------------------------------------------|
| Reference/<br>year of publication/<br>country                                                   | Psoriasis all/<br>psoriasis with<br>cancer/<br>reference all/<br>reference with<br>cancer | Age<br>Psoriasis/reference<br>Median (range) or<br>mean +/- SD | Sex<br>Psoriasis<br>females/males/<br>reference<br>females/males | Assessment of<br>psoriasis                                | Assessment of<br>cancer                                              | Results                  | Treatment<br>investigated | Characteristics<br>of reference<br>population |
| Bailin <sup>1</sup><br>1975<br>USA                                                              | 205/13                                                                                    | –                                                              | –                                                                | Hospital diagnosed<br>psoriasis                           | Not reported                                                         | –                        | Methotrexate              | –                                             |
| Pittelkow <sup>2</sup><br>1981<br>UK                                                            | 260/44                                                                                    | –                                                              | –                                                                | Records from<br>patients<br>hospitalized for<br>psoriasis | Skin cancer: biopsy<br>Other cancers: Self-<br>reported              | –                        | Coal tar                  | –                                             |
| Halprin <sup>3</sup><br>1982<br>USA                                                             | 150/29<br>150/25                                                                          | 62 (24–92)<br>62 (24–92)                                       | 3/147<br>3/147                                                   | Hospitalized for<br>psoriasis                             | Skin cancer: biopsy<br>verified<br>Internal cancers:<br>Not reported | –                        | –                         | DM–2–<br>patients                             |
| Alderson <sup>4</sup><br>1983<br>Scotland                                                       | 8,405/403                                                                                 | –                                                              | –                                                                | Discharge records<br>with a psoriasis<br>diagnosis        | ICD–O from the<br>Scottish National<br>cancer registry               | SIR/P–value<br>0.95/<0.5 | –                         | –                                             |
| Nyfors <sup>5</sup><br>1983<br>Denmark                                                          | 248/10                                                                                    | Mean 52                                                        | 128/120                                                          | Hospital diagnosed<br>psoriasis                           | personal follow–up<br>by one of the<br>authors                       | –                        | Methotrexate              | –                                             |
| Jones <sup>6</sup><br>1985<br>UK                                                                | 719/32                                                                                    | Not reported                                                   | 414/305                                                          | Not reported                                              | Data sources from<br>the West of<br>Scotland cancer<br>registry      | –                        | Tar                       | –                                             |
| Peng <sup>7</sup><br>1985<br>China                                                              | 213/7                                                                                     | –                                                              | 57/156                                                           | Diagnosed by<br>dermatologist                             | Not reported                                                         | –                        | –                         | –                                             |

|                                                           |                         |            |             |                                                                             |                                                                                                  |                                              |                             |                             |
|-----------------------------------------------------------|-------------------------|------------|-------------|-----------------------------------------------------------------------------|--------------------------------------------------------------------------------------------------|----------------------------------------------|-----------------------------|-----------------------------|
| Liu <sup>8</sup><br>1989<br>Shanghai                      | 344/3                   | 11–80      | 136/208     | Hospital diagnosed psoriasis                                                | Not reported                                                                                     | –                                            | –                           | –                           |
| Powles <sup>9</sup><br>1990<br>UK                         | 44/3                    | Mean 48    | 20/24       | Hospital diagnosed psoriasis                                                | Not reported                                                                                     | –                                            | Cyclosporin                 | –                           |
| Grossman <sup>10</sup><br>1996<br>Frankrig                | 122/7                   | –          | –           | Review of hospital records                                                  | Not reported                                                                                     | –                                            | Cyclosporin                 | –                           |
| Frentz <sup>11</sup> (BJD 141)<br>1999a<br>Denmark        | 6,905/795               | –          | 3,487/3,418 | ICD–8: 696 from the Danish National hospital discharge register             | ICD–O from The National Danish cancer registry                                                   | SIR <sub>adj</sub> (CI)<br>1.4 (1.21–1.51)   | –                           | –                           |
| Frentz <sup>12</sup> (BJD 140)<br>1999b<br>Denmark        | 1,738/83                | Mean 43    | 866/872     | Hospital diagnosed psoriasis                                                | ICD–O from The National Danish cancer registry                                                   | SIR <sub>adj</sub> (CI)<br>1.59 (1.3–2.0)    | Clime therapy               | –                           |
| Hannuksela–Svahn <sup>13</sup> (JAAD)<br>1999a<br>Finland | 158/7                   | 41 (12–82) | 73/85       | Hospital diagnosed psoriasis                                                | Patients were linked to the Finnish National cancer registry via personal identification numbers | –                                            | 8–methoxypsoralen bath PUVA | –                           |
| Hannuksela–Svahn <sup>14</sup><br>2000<br>Finland         | 5,687/631               | –          | 2,555/3,132 | The national discharge register linked with the Population Central register | Patients were linked to the Finnish National cancer registry via personal identification numbers | SIR <sub>adj</sub> (CI)<br>1.3 (1.2–1.4)*    | –                           | –                           |
| Haustein <sup>15</sup><br>2000<br>Germany                 | 157/6                   | Mean 48.3  | 48/109      | Hospital records of patients with psoriasis                                 | Not reported                                                                                     | –                                            | Methotrexate                | –                           |
| Margolis <sup>16</sup><br>2001<br>USA                     | 17,620/798<br>3,869/165 | –          | –           | ICD–9 codes and National drug codes consistent with                         | ICD–9 codes for cancer from a Medicaid database                                                  | RRR <sub>adj</sub> **<br>Severe/mild (95%CI) | –                           | Patients with severe eczema |

|                                                    |                            |                                |                              |                                          |                                                                            |                                          |                                              |                  |
|----------------------------------------------------|----------------------------|--------------------------------|------------------------------|------------------------------------------|----------------------------------------------------------------------------|------------------------------------------|----------------------------------------------|------------------|
|                                                    |                            |                                |                              | psoriasis from a Medicaid database       |                                                                            | 1.42(1.32–2.40)/0.93(0.86–1.10)          |                                              |                  |
| Paul <sup>17</sup><br>2003<br>International        | 1,252/47                   | 43.3 +/- 14                    | 32%/68%                      | Not reported                             | Malignancies were verified by the investigators                            | SIR <sub>adj</sub> (CI)<br>2.1 (1.6–2.9) | cyclosporine                                 | –                |
| Weischer <sup>18</sup><br>2004<br>Germany          | 195/1                      | Mean 45.5–47.1                 | 69/126                       | Hospital diagnosed psoriasis             | Review of cancer records from The Regional Interdisciplinary Cancer Centre | –                                        | Ultraviolet B therapy                        | –                |
| Smith <sup>19</sup><br>2006<br>UK                  | 22/2                       | 43.4 +/- 11.9                  | 5/18                         | Hospital diagnosed psoriasis             | Not reported                                                               | –                                        | Infliximab                                   | –                |
| Ahmad <sup>20</sup><br>2006<br>Ireland             | 49/2                       | Mean 51.6                      | 17/32                        | Treated for psoriasis by a dermatologist | Not reported                                                               | –                                        | Etanercept                                   | –                |
| Antoniou <sup>21</sup><br>2010<br>Greece           | 118/3                      | 49 (19–80)                     | 36/82                        | Hospital diagnosed psoriasis             | Not reported                                                               | –                                        | Etanercept                                   | –                |
| Brunasso <sup>22</sup><br>2011<br>Italy            | 103/6                      | –                              | –                            | Review of case files                     | Not reported                                                               | –                                        | Biologics                                    | –                |
| van Lümig <sup>23</sup><br>2011<br>The Netherlands | 173/9                      | 50.6 +/- 12.1                  | 64/109                       | Hospital diagnosed psoriasis             | Not reported                                                               | –                                        | Biologics                                    | –                |
| Garcia–Dova <sup>24</sup><br>2012<br>Spain         | 1,042/10                   | 45 +/- 14                      | 397/645                      | Hospital diagnosed psoriasis             | Not reported                                                               | –                                        | Biologic – and non–biologic systemic therapy | –                |
| Lan <sup>25</sup><br>2012                          | 8,180/369<br>163,600/6,273 | 47.5 +/- 17.3<br>47.4 +/- 17.3 | 3,738/4,442<br>74,760/88,840 | ICD–9 codes for psoriasis from The       | ICD–O codes for cancer from The                                            | HR <sub>adj</sub> (CI)                   | –                                            | Matched controls |

|                                                  |                        |                                  |                            |                                                                                                           |                                                                                                             |                        |                                               |                                                                              |
|--------------------------------------------------|------------------------|----------------------------------|----------------------------|-----------------------------------------------------------------------------------------------------------|-------------------------------------------------------------------------------------------------------------|------------------------|-----------------------------------------------|------------------------------------------------------------------------------|
| Taiwan                                           |                        |                                  |                            | National Health Insurance Program database                                                                | National Health Insurance Program database                                                                  | 1.27 (1.09–1.49)       |                                               |                                                                              |
| Puig <sup>26</sup><br>2012<br>Spain              | 444/6                  | 46.48 +/- 13.6                   | 45.5%/65.5%                | Hospital diagnosed psoriasis                                                                              | Physical examination and laboratory test every three months                                                 | –                      | Etanercept                                    | –                                                                            |
| Staumont–Salle <sup>27</sup><br>2012<br>Frankrig | 306/9                  | Mean 47                          | 104/202                    | Hospital diagnosed psoriasis                                                                              | Not reported                                                                                                | –                      | Biologic– and non–biologic systemic treatment | –                                                                            |
| Conti <sup>28</sup><br>2013<br>Italy             | 45/2                   | 58.29 +/- 13.12                  | 14/31                      | Hospital diagnosed psoriasis                                                                              | Not reported                                                                                                | –                      | Etanercept                                    | –                                                                            |
| Gulliver <sup>29</sup><br>2014<br>Canada         | 3,289/232              | Not reported                     | Not reported               | Diagnosed by dermatologist                                                                                | The Newfoundland and Labrador Medical Care Plan (MCP) was used to link patients to administrative databases | IR/PY<br>587.8/100,000 | –                                             | –                                                                            |
| Kimball <sup>30</sup><br>2014<br>USA             | 2,510/122              | 46.3 +/- 13.6                    | 1,194 /1,317               | Patients eligible for etanercept for their psoriasis                                                      | Not reported                                                                                                | –                      | Etanercept                                    | –                                                                            |
| Brănișteanu <sup>31</sup><br>2015<br>Romania     | 57/2                   | –                                | –                          | Diagnosed by dermatologist                                                                                | Not reported                                                                                                | –                      | TNF–alpha–inhibitors                          | –                                                                            |
| Feldman <sup>32</sup><br>2015<br>USA             | 5,492/379<br>5,492/221 | 47.62 +/- 1.65<br>47.62 +/- 1.65 | 2,444/3,048<br>2,444/3,048 | Two diagnoses of psoriasis (ICD–9–code 696.1) from the OptumHealth Reporting and Insights claims database | ICD–O codes for cancer from the OptumHealth Reporting and Insights claims database                          | –                      | –                                             | Matched controls from the OptumHealth Reporting and Insights claims database |

|                                                 |                                    |                                                                               |                                   |                                                                                                         |                                                                                 |                                            |                                               |                                                                |
|-------------------------------------------------|------------------------------------|-------------------------------------------------------------------------------|-----------------------------------|---------------------------------------------------------------------------------------------------------|---------------------------------------------------------------------------------|--------------------------------------------|-----------------------------------------------|----------------------------------------------------------------|
| Lijnen <sup>33</sup><br>2015<br>The Netherlands | 176/5                              | 47 +/- 14                                                                     | 74/102                            | Not reported                                                                                            | Not reported                                                                    | –                                          | dimethylfumarate                              | –                                                              |
| Spehr <sup>34</sup><br>2015<br>Germany          | 3,322/–                            | Mean 47                                                                       | 40.5% female                      | Eligible for inclusion in Psobest registry                                                              | Not reported                                                                    | IR/PY<br>0.93/100                          | Biologic– and non–biologic systemic treatment | –                                                              |
| Asgari <sup>35</sup><br>2016<br>USA             | 5,889/689                          | 51.00 +/- 15                                                                  | 2,914/2,975                       | ICD–9 code 696.1 and systemic psoriasis treatment in the Kaiser Permanente Northern California database | ICD–O codes for cancer from KPNC Cancer Registry                                | –                                          | Biologic– and non–biologic systemic treatment | –                                                              |
| Esposito <sup>36</sup><br>2016<br>Italy         | 350/4                              | 48.4 +/- 13.1                                                                 | 42%/68 %                          | Hospital diagnosed psoriasis                                                                            | Not reported                                                                    | –                                          | Biologics                                     | –                                                              |
| Fuxench <sup>37</sup><br>2016<br>UK             | 198,366/9,425<br>937,716/48,219    | 46.21 +/- 17.36 mild<br>49.20 +/- 15.03 moderate<br>49.73 +/- 17.53 reference | 102,541/95,825<br>524,672/413,044 | At least one diagnostic Read code for psoriasis used in The Health Improvement Network (THIN)           | a series of Read codes for cancer used in The Health Improvement Network (THIN) | –                                          | –                                             | Reference patients were from same General Practice as subjects |
| Vergou <sup>38</sup><br>2016<br>Greece          | 93/3                               | Mean 48.7                                                                     | 43/50                             | Hospital diagnosed psoriasis                                                                            | Not reported                                                                    | –                                          | Ustekisumab                                   | –                                                              |
| Menter <sup>39</sup><br>2017<br>International   | 6,051/247                          | 47.0 (18–94)                                                                  | 2,562/3,489                       | Dermatologist                                                                                           | Not reported                                                                    | –                                          | Adalimumab                                    | –                                                              |
| Kreimer <sup>40</sup><br>2018<br>Argentina      | 1,969/56                           | Not reported                                                                  | Not reported                      | Hospital diagnosed psoriasis                                                                            | Not reported                                                                    | –                                          | –                                             | –                                                              |
| Lee <sup>41</sup><br>2018<br>Korea              | 892,089/21,308<br>4,460,445/99,591 | 48.3 +/- 16.57<br>4.3 +/- 16.57                                               | 430,917/461,172                   | At least two hospital/clinic visits with an ICD–10                                                      | ICD–10 codes (C00–C96) for cancer in the National Health                        | HR <sub>adj</sub> (CI)<br>1.06 (1.05–1.08) | –                                             | Matched controls from National                                 |

|                                                                                                                         |            |   |               |                                                                                                                                          |                                                                                                              |   |   |                          |
|-------------------------------------------------------------------------------------------------------------------------|------------|---|---------------|------------------------------------------------------------------------------------------------------------------------------------------|--------------------------------------------------------------------------------------------------------------|---|---|--------------------------|
|                                                                                                                         |            |   |               | code for psoriasis from the National Health Insurance Service database                                                                   | Insurance Service database                                                                                   |   |   | Health Insurance Service |
| Wu <sup>42</sup><br>2018<br>USA                                                                                         | 42,794/959 | – | 22,154/20,640 | 2 ICD–codes for psoriasis, one by a dermatologist, from the Truven Health Analytics MarketScan Commercial Claims and Encounters Database | ICD–O codes for cancer from the Truven Health Analytics MarketScan Commercial Claims and Encounters Database | – | – | –                        |
| <p>*Excludes basal cell carcinoma</p> <p>**This result was based on a reference group of patients with hypertension</p> |            |   |               |                                                                                                                                          |                                                                                                              |   |   |                          |

| table 1b. Details of studies included in analysis for cancer excluding keratinocyte cancer in patients with psoriasis |                                                                                           |                            |                                                                  |                                                                     |                                                                      |                                                 |                           |                                               |
|-----------------------------------------------------------------------------------------------------------------------|-------------------------------------------------------------------------------------------|----------------------------|------------------------------------------------------------------|---------------------------------------------------------------------|----------------------------------------------------------------------|-------------------------------------------------|---------------------------|-----------------------------------------------|
| Reference/<br>year of publication/<br>country                                                                         | Psoriasis all/<br>psoriasis with<br>cancer/<br>reference all/<br>reference with<br>cancer | Age<br>Psoriasis/reference | Sex<br>Psoriasis<br>females/males/<br>reference<br>females/males | Assessment of<br>psoriasis                                          | Assessment of<br>cancer                                              | Results                                         | Treatment<br>investigated | Characteristics<br>of reference<br>population |
| Bailin <sup>1</sup><br>1975<br>USA                                                                                    | 205/8                                                                                     | –                          | –                                                                | Hospital diagnosed<br>psoriasis                                     | Not reported                                                         | –                                               | Methotrexate              | –                                             |
| Pittelkow <sup>2</sup><br>1981<br>UK                                                                                  | 260/25                                                                                    | –                          | –                                                                | Records from<br>patients<br>hospitalized for<br>psoriasis           | Skin cancer: biopsy<br>Other cancers: Self-<br>reported              | –                                               | Coal tar                  | –                                             |
| Halprin <sup>3</sup><br>1982<br>USA                                                                                   | 150/9<br>150/18                                                                           | 62 (24–92)<br>62 (24–92)   | 3/147<br>3/147                                                   | Hospitalized for<br>psoriasis                                       | Skin cancer: biopsy<br>verified<br>Internal cancers:<br>Not reported | –                                               | –                         | DM–2–<br>patients                             |
| Nyfors <sup>5</sup><br>1983<br>Denmark                                                                                | 248/9                                                                                     | Mean 52                    | 128/120                                                          | Hospital diagnosed<br>psoriasis                                     | personal follow–up<br>by one of the<br>authors                       | –                                               | Methotrexate              | –                                             |
| Jones <sup>6</sup><br>1985<br>UK                                                                                      | 719/29                                                                                    | –                          | 414/305                                                          | Not reported                                                        | Data sources from<br>the West of<br>Scotland cancer<br>registry      | –                                               | Tar                       | –                                             |
| Lindelof <sup>43</sup><br>1990<br>Sweden                                                                              | 20,328/494                                                                                | Mean 48                    | 11,292/9,036                                                     | The Swedish<br>psoriasis<br>association’s<br>membership<br>registry | The Swedish<br>National Cancer<br>Registry                           | SIR <sub>adj</sub> (CI)<br>0.96 (0.88–<br>1.05) | –                         | –                                             |
| Stern <sup>44</sup><br>1995<br>USA                                                                                    | 956/45                                                                                    | 50 (14)                    | 368/588                                                          | Hospital diagnosed<br>psoriasis                                     | Not reported                                                         | –                                               | Etretinate                | –                                             |
| Grossman <sup>10</sup><br>1996                                                                                        | 122/6                                                                                     | –                          | –                                                                | Review of hospital<br>records                                       | Not reported                                                         | –                                               | Cyclosporin               | –                                             |



|                                                                     |           |               |             |                                                                             |                                                                                                  |                                          |                             |   |
|---------------------------------------------------------------------|-----------|---------------|-------------|-----------------------------------------------------------------------------|--------------------------------------------------------------------------------------------------|------------------------------------------|-----------------------------|---|
| Frankrig                                                            |           |               |             |                                                                             |                                                                                                  |                                          |                             |   |
| Frentz <sup>11</sup> (BJD 141)<br>1999a<br>Denmark                  | 6,905/599 | –             | 3,487/3,418 | ICD–8: 696 from the Danish National hospital discharge register             | ICD–O from The National Danish cancer registry                                                   | –                                        | –                           | – |
| Frentz <sup>12</sup> (BJD 140)<br>1999b<br>Denmark                  | 1738/46   | Mean 43       | 866/872     | Hospital diagnosed psoriasis                                                | ICD–O from The National Danish cancer registry                                                   | –                                        | Climatotherapy              | – |
| Hannuksela–Svahn <sup>13</sup> (JAAD)<br>1999a<br>Finland           | 158/6     | 41 (12–82)    | 73/85       | Hospital diagnosed psoriasis                                                | Patients were linked to the Finnish National cancer registry via personal identification numbers | SIR <sub>adj</sub> (CI)<br>1.3 (0.5–2.8) | 8–methoxypsoralen bath PUVA | – |
| Hannuksela–Svahn <sup>45</sup> (BJD)<br>1999b<br>Sweden and Finland | 944/57    | Mean 43–44    | 363/581     | Hospital diagnosed psoriasis                                                | The National Swedish and Finnish Cancer Registries                                               | SIR (CI)<br>1.1 (0.8–1.4)*               | Trioxalen bath PUVA         | – |
| Lindelof <sup>46</sup><br>1999<br>Sweden                            | 4,799/459 | 45.3 (6–93)   | 2456/2343   | Dermatologist                                                               | The National Swedish Cancer Registry                                                             | –                                        | PUVA                        | – |
| Hannuksela–Svahn <sup>14</sup><br>2000<br>Finland                   | 5,687/493 | –             | 2,555/3,132 | The national discharge register linked with the Population Central register | Patients were linked to the Finnish National cancer registry via personal identification numbers | –                                        | –                           | – |
| Haustein <sup>15</sup><br>2000<br>Germany                           | 157/3     | Mean 48.3     | 48/109      | Hospital records of patients with psoriasis                                 | Not reported                                                                                     | –                                        | Methotrexate                | – |
| Paul <sup>17</sup><br>2003<br>International                         | 1,252/26  | 43.3 +/- 14   | 32%/68%     | Not reported                                                                | Malignancies were verified by the investigators                                                  | –                                        | Cyclosporine                | – |
| Smith <sup>19</sup><br>2006                                         | 23/1      | 43.4 +/- 11.9 | 5/18        | Hospital diagnosed psoriasis                                                | Not reported                                                                                     | –                                        | Infliximab                  | – |

|                                                    |                          |                            |                            |                                                                                            |                                                                                           |                                             |                                              |                                                                 |
|----------------------------------------------------|--------------------------|----------------------------|----------------------------|--------------------------------------------------------------------------------------------|-------------------------------------------------------------------------------------------|---------------------------------------------|----------------------------------------------|-----------------------------------------------------------------|
| UK                                                 |                          |                            |                            |                                                                                            |                                                                                           |                                             |                                              |                                                                 |
| Väkevä <sup>47</sup><br>2008<br>Finland            | 63/4                     | –                          | –                          | Dermatologist                                                                              | The Finnish Cancer Registry                                                               | –                                           | Cyclosporine                                 | –                                                               |
| Brauchli <sup>48</sup><br>2009<br>UK               | 33,760/927<br>34,001/776 |                            | 53.1%/46.9%<br>53.2%/46.8% | A diagnosis of psoriasis in the UK General Practice Research Database                      | A cancer diagnosis in the UK General Practice Research Database and appropriate treatment | IRR <sub>adj</sub> (CI)<br>1.13 (1.02–1.24) | –                                            | Matched controls from the UK General Practice Research Database |
| Ji <sup>49</sup><br>2009<br>Sweden                 | 15,858/1,317             | –                          | –                          | ICD–7, 8, 9 and 10 codes for psoriasis from the Swedish hospital discharge register        | ICD–7 codes for cancer from the Swedish Cancer Registry                                   | –                                           | –                                            | –                                                               |
| Antoniou <sup>21</sup><br>2010<br>Greece           | 118/3                    | 49 (19–80)                 | 36/82                      | Hospital diagnosed psoriasis                                                               | Not reported                                                                              | –                                           | Etanercept                                   | –                                                               |
| Brunasso <sup>22</sup><br>2011<br>Italy            | 103/5                    | –                          | –                          | Review of case files                                                                       | Not reported                                                                              | –                                           | Biologics                                    | –                                                               |
| van Lümig <sup>23</sup><br>2011<br>The Netherlands | 173/3                    | 50.6 +/- 12.1              | 64/109                     | Hospital diagnosed psoriasis                                                               | Not reported                                                                              | –                                           | Biologics                                    | –                                                               |
| Prizment <sup>50</sup><br>2011<br>USA              | 719/107<br>32,191/6,381  | 67.8 +/- 3<br>68.1 +/- 3,2 | 719<br>32,191              | (ICD–9) code 696.1 from Medicare claims of participants in the Iowa’s Women’s Health Study | ICD–O codes from the State Health Registry of Iowa                                        | HR <sub>adj</sub> (CI) 1.2<br>(1.0–1.4)     | –                                            | Participants in the Iowa’s Women’s Health Study                 |
| Garcia–Dova <sup>24</sup><br>2012<br>Spain         | 1,042/8                  | 45 +/- 14                  | 397/645                    | Hospital diagnosed psoriasis                                                               | Not reported                                                                              | –                                           | Biologic – and non–biologic systemic therapy | –                                                               |

|                                                 |                        |                                  |                            |                                                                                                                 |                                                                                    |                                             |                                               |                                                                              |
|-------------------------------------------------|------------------------|----------------------------------|----------------------------|-----------------------------------------------------------------------------------------------------------------|------------------------------------------------------------------------------------|---------------------------------------------|-----------------------------------------------|------------------------------------------------------------------------------|
| Puig <sup>26</sup><br>2012<br>Spain             | 444/4                  | 46.48 +/- 13.6                   | 45.5%/65.5%                | Hospital diagnosed psoriasis                                                                                    | Physical examination and laboratory test every three months                        | –                                           | Etanercept                                    | –                                                                            |
| Staumont–Salle <sup>27</sup><br>2012<br>France  | 306/8                  | Mean 47                          | 104/202                    | Hospital diagnosed psoriasis                                                                                    | Not reported                                                                       | –                                           | Biologic– and non–biologic systemic treatment | –                                                                            |
| Conti <sup>28</sup><br>2013<br>Italy            | 45/2                   | 58.29 +/- 13.12                  | 14/31                      | Hospital diagnosed psoriasis                                                                                    | Not reported                                                                       | –                                           | Etanercept                                    | –                                                                            |
| Kimball <sup>30</sup><br>2014<br>USA            | 2,510/60               | 46.3 +/- 13.6                    | 1,194 /1,317               | Patients eligible for etanercept for their psoriasis                                                            | Not reported                                                                       | SIR <sub>adj</sub> (CI)<br>0.95 (0.92–1.21) | Etanercept                                    | –                                                                            |
| Yun <sup>51</sup><br>2014<br>USA                | –/270                  | –                                | –                          | Enrolled in the Medicare program with a dermatologist visit plus a prescription of psoriasis–specific treatment | ICD9 140–208, except 173.x from the Medicare database                              | IR/PY<br>9.2/1000                           | –                                             | –                                                                            |
| Feldman <sup>32</sup><br>2015<br>USA            | 5,492/214<br>5,492/140 | 47.62 +/- 1.65<br>47.62 +/- 1.65 | 2,444/3,048<br>2,444/3,048 | Two diagnoses of psoriasis (ICD–9–code 696.1) from the OptumHealth Reporting and Insights claims database       | ICD–O codes for cancer from the OptumHealth Reporting and Insights claims database | –                                           | –                                             | Matched controls from the OptumHealth Reporting and Insights claims database |
| Lijnen <sup>33</sup><br>2015<br>The Netherlands | 176/4                  | 47 +/- 14                        | 74/102                     | Not reported                                                                                                    | Not reported                                                                       | –                                           | dimethylfumarate                              | –                                                                            |
| Menter <sup>52</sup><br>2015<br>International   | 6,059/166              | 47.0 (18–94)                     | 2,566/3,493                | Dermatologist                                                                                                   | Not reported                                                                       | –                                           | Adalimumab                                    | –                                                                            |

|                                                   |                                 |                                                                               |                                   |                                                                                                         |                                                                                   |                                            |                                               |                                                                |
|---------------------------------------------------|---------------------------------|-------------------------------------------------------------------------------|-----------------------------------|---------------------------------------------------------------------------------------------------------|-----------------------------------------------------------------------------------|--------------------------------------------|-----------------------------------------------|----------------------------------------------------------------|
| Asgari <sup>35</sup><br>2016<br>USA               | 5,889/329                       | 51.00 +/- 15                                                                  | 2,914/2,975                       | ICD-9 code 696.1 and systemic psoriasis treatment in the Kaiser Permanente Northern California database | ICD-O codes for cancer from Kaiser Permanente Northern California Cancer Registry | -                                          | Biologic- and non-biologic systemic treatment | -                                                              |
| Esposito <sup>36</sup><br>2016<br>Italy           | 350/3                           | 48.4 +/- 13.1                                                                 | 42%/68 %                          | Hospital diagnosed psoriasis                                                                            | Not reported                                                                      | -                                          | Biologics                                     | -                                                              |
| Fuxench <sup>37</sup><br>2016<br>UK               | 198,366/6,289<br>937,716/32,241 | 46.21 +/- 17.36 mild<br>49.20 +/- 15.03 moderate<br>49.73 +/- 17.53 reference | 102,541/95,825<br>524,672/413,044 | At least one diagnostic Read code for psoriasis used in The Health Improvement Network (THIN)           | a series of Read codes for cancer used in The Health Improvement Network (THIN)   | HR <sub>adj</sub> (CI)<br>1.06 (1.02-1.09) | -                                             | Reference patients were from same General Practice as subjects |
| Li <sup>53</sup><br>2016<br>USA                   | 1,120/209<br>63,770/8,139       | 61.0 +/- 6.8<br>60.8 +/- 6.8                                                  | 1,220<br>63,770                   | Self-reported psoriasis confirmed using the Psoriasis Screening Tool questionnaire                      | Not reported                                                                      | HR <sub>adj</sub> (CI)<br>1.06 (0.92-1.21) | -                                             | Participants in the Nurses' Health Study                       |
| Vergou <sup>38</sup><br>2016<br>Greece            | 93/1                            | Mean 48.7                                                                     | 43/50                             | Hospital diagnosed psoriasis                                                                            | Not reported                                                                      | -                                          | Ustekisumab                                   | -                                                              |
| Fiorentino <sup>54</sup><br>2017<br>International | 12,092/252                      | 48 +/- 13.91                                                                  | 5,456/6,636                       | Dermatologist                                                                                           | Cancers were reported by treating dermatologist                                   | -                                          | Systemic treatment                            | -                                                              |
| Magnano <sup>55</sup><br>2017<br>Italy            | 359/9                           | Mean 60                                                                       | -                                 | Review of clinical records                                                                              | Not reported                                                                      | -                                          | -                                             | -                                                              |
| Napolitano <sup>56</sup><br>2017<br>Italy         | 915/8                           | Mean 58.7                                                                     | 420/495                           | Dermatologist                                                                                           | Not reported                                                                      | -                                          | Systemic treatment                            | -                                                              |

|                                 |            |   |               |                                                                                                                                          |                                                                                                              |   |   |   |
|---------------------------------|------------|---|---------------|------------------------------------------------------------------------------------------------------------------------------------------|--------------------------------------------------------------------------------------------------------------|---|---|---|
| Wu <sup>42</sup><br>2018<br>USA | 42,794/444 | – | 22,154/20,640 | 2 ICD–codes for psoriasis, one by a dermatologist, from the Truven Health Analytics MarketScan Commercial Claims and Encounters Database | ICD–O codes for cancer from the Truven Health Analytics MarketScan Commercial Claims and Encounters Database | – | – | – |
| *Also excluding melanomas       |            |   |               |                                                                                                                                          |                                                                                                              |   |   |   |

| table 1c. Details of studies included in analysis for keratinocyte cancer in patients with psoriasis |                                                                                           |                            |                                                                  |                                                                   |                                                                      |         |                           |                                               |
|------------------------------------------------------------------------------------------------------|-------------------------------------------------------------------------------------------|----------------------------|------------------------------------------------------------------|-------------------------------------------------------------------|----------------------------------------------------------------------|---------|---------------------------|-----------------------------------------------|
| Reference/<br>year of publication/<br>country                                                        | Psoriasis all/<br>psoriasis with<br>cancer/<br>reference all/<br>reference with<br>cancer | Age<br>Psoriasis/reference | Sex<br>Psoriasis<br>females/males/<br>reference<br>females/males | Assessment of<br>psoriasis                                        | Assessment of<br>cancer                                              | Results | Treatment<br>investigated | Characteristics<br>of reference<br>population |
| Bailin <sup>1</sup><br>1975<br>USA                                                                   | 205/6                                                                                     | –                          | –                                                                | Hospital diagnosed<br>psoriasis                                   | Not reported                                                         | –       | Methotrexate              | –                                             |
| Pittelkow <sup>2</sup><br>1981<br>UK                                                                 | 260/19                                                                                    | –                          | –                                                                | Records from<br>patients<br>hospitalized for<br>psoriasis         | Skin cancer: biopsy<br>Other cancers: Self-<br>reported              | –       | Coal tar                  | –                                             |
| Halprin <sup>3</sup><br>1982<br>USA                                                                  | 150/20<br>150/7                                                                           | 62 (24–92)<br>62 (24–92)   | 3/147<br>3/147                                                   | Hospitalized for<br>psoriasis                                     | Skin cancer: biopsy<br>verified<br>Internal cancers:<br>Not reported | –       | –                         | DM–2–<br>patients                             |
| Menter <sup>57</sup><br>1983<br>USA                                                                  | 300/15                                                                                    | (3–82)                     | –                                                                | Dermatologist                                                     | Not reported                                                         | –       | Goeckerman<br>regimen     | –                                             |
| Nyfors <sup>5</sup><br>1983<br>Denmark                                                               | 248/1                                                                                     | Mean 52                    | 128/120                                                          | Treated for<br>psoriasis and<br>followed by one of<br>the authors | The National Cancer<br>Registry and<br>personal follow–up            | –       | Methotrexate              | –                                             |
| Reshad <sup>58</sup><br>1984<br>UK                                                                   | 216/8                                                                                     | Mean 49                    | 101/115                                                          | Hospital diagnosed<br>psoriasis                                   | Histopathological<br>verification                                    | –       | PUVA                      | –                                             |
| Jones <sup>6</sup><br>1985<br>UK                                                                     | 719/3                                                                                     | –                          | 414/305                                                          | Not reported                                                      | Data sources from<br>the West of<br>Scotland cancer<br>registry      | –       | Tar                       | –                                             |
| Leone <sup>59</sup><br>1985<br>USA                                                                   | 205/4                                                                                     | –                          | –                                                                | Dermatologist                                                     | Not reported                                                         | –       | PUVA                      | –                                             |

|                                                           |                |                          |                  |                                                                 |                                                                                                  |                                             |                                                |                                     |
|-----------------------------------------------------------|----------------|--------------------------|------------------|-----------------------------------------------------------------|--------------------------------------------------------------------------------------------------|---------------------------------------------|------------------------------------------------|-------------------------------------|
| Torinuki <sup>60</sup><br>1988<br>Japan                   | 151/1          | 45.5 (15–77)             | –                | Dermatologist                                                   | Dermatologist                                                                                    | –                                           | Methoxalen phototherapy and goeckermans regime | –                                   |
| Forman <sup>61</sup><br>1989<br>USA                       | 551/29         | Mean 49.2                | –                | Hospital diagnosed psoriasis                                    | Dermatologist and biopsy                                                                         | –                                           | PUVA                                           | –                                   |
| Takashima <sup>62</sup><br>1990<br>Japan                  | 214/1          | Mean 49.7                | 83/131           | Hospital diagnosed psoriasis                                    | Nor informed                                                                                     | –                                           | PUVA                                           | –                                   |
| Mali–Gerrits <sup>63</sup><br>1991<br>The Netherlands     | 227/15<br>95/1 | 49 +/- 0.2<br>46 +/- 1.2 | 100/127<br>60/35 | Dermatologist                                                   | Biopsy                                                                                           | –                                           | PUVA and methotrexate                          | Partners of patients with psoriasis |
| van Praag <sup>64</sup><br>1993<br>The Netherlands        | 260/11         | Mean 52.1                | 94/166           | Hospital diagnosed psoriasis                                    | Physical examination                                                                             | –                                           | PUVA                                           | –                                   |
| Grossman <sup>10</sup><br>1996<br>Frankrig                | 122/1          | –                        | –                | Review of hospital records                                      | Not reported                                                                                     | –                                           | Cyclosporin                                    | –                                   |
| Frentz <sup>11</sup> (BJD 141)<br>1999a<br>Denmark        | 6,905/196      | –                        | 3,487/3,418      | ICD–8: 696 from the Danish National hospital discharge register | ICD–O from The National Danish cancer registry                                                   | SIR <sub>adj</sub> (CI)<br>2.46 (2.13–2.83) | –                                              | –                                   |
| Frentz <sup>12</sup> (BJD 140)<br>1999b<br>Denmark        | 1738/37        | Mean 43                  | 866/872          | Hospital diagnosed psoriasis                                    | ICD–O from The National Danish cancer registry                                                   | –                                           | Climatotherapy                                 | –                                   |
| Hannuksela–Svahn <sup>13</sup> (JAAD)<br>1999a<br>Finland | 158/1          | 41 (12–82)               | 73/85            | Hospital diagnosed psoriasis                                    | Patients were linked to the Finnish National cancer registry via personal identification numbers | SIR <sub>adj</sub> (CI)<br>1.4 (0–7.6)      | 8–methoxypsoralen bath PUVA                    | –                                   |

|                                                   |                         |             |             |                                                                                        |                                                                                                  |                                                                                     |                                              |                             |
|---------------------------------------------------|-------------------------|-------------|-------------|----------------------------------------------------------------------------------------|--------------------------------------------------------------------------------------------------|-------------------------------------------------------------------------------------|----------------------------------------------|-----------------------------|
| Hannuksela-Svahn <sup>14</sup><br>2000<br>Finland | 5,687/138               | –           | 2,555/3,132 | The national discharge register linked with the Population Central register            | Patients were linked to the Finnish National cancer registry via personal identification numbers | SIR <sub>adj</sub> (CI)<br>3.2 (2.3–4.4)*                                           | –                                            | –                           |
| Haustein <sup>15</sup><br>2000<br>Germany         | 157/3                   | Mean 48.3   | 48/109      | Hospital records of patients with psoriasis                                            | Not reported                                                                                     | –                                                                                   | Methotrexate                                 | –                           |
| Margolis <sup>16</sup><br>2001<br>USA             | 17,620/798<br>3,869/165 | –           | –           | ICD–9 codes and National drug codes consistent with psoriasis from a Medicaid database | ICD–9 codes for cancer from a Medicaid database                                                  | RRR <sub>adj</sub> **<br>Severe/mild (95%CI)<br>1.42(1.32–2.40)/<br>0.93(0.86–1.10) | –                                            | Patients with severe eczema |
| Paul <sup>17</sup><br>2003<br>International       | 1,252/21                | 43.3 +/- 14 | 32%/68%     | Not reported                                                                           | Malignancies were verified by the investigators                                                  | SIR <sub>adj</sub> (CI)<br>6.2 (3.8–9.5)                                            | Cyclosporine                                 | –                           |
| Ahmad <sup>20</sup><br>2006<br>Ireland            | 49/2                    | Mean 51.6   | 17/32       | Dermatologist                                                                          | Not reported                                                                                     | –                                                                                   | Etanercept                                   | –                           |
| Warren <sup>65</sup><br>2008<br>UK                | 102/1                   | 45 +/- 19   | 59/43       | Hospital diagnosed psoriasis                                                           | Physical examination                                                                             | –                                                                                   | Biologics                                    | –                           |
| Brunasso <sup>22</sup><br>2011<br>Italy           | 103/1                   | –           | –           | Review of case files                                                                   | Not reported                                                                                     | –                                                                                   | Biologics                                    | –                           |
| Garcia–Dova <sup>24</sup><br>2012<br>Spain        | 1,042/2                 | 45 +/- 14   | 397/645     | Hospital diagnosed psoriasis                                                           | Not reported                                                                                     | –                                                                                   | Biologic – and non–biologic systemic therapy | –                           |
| Lee <sup>66</sup><br>2012<br>Taiwan               | 7,061/25                | Mean 42.5   | 3,207/3,854 | ICD–codes                                                                              | ICD–O and treatment                                                                              | IRR <sub>adj</sub> (CI)<br>7.5 (5.07–11.1)                                          | –                                            | –                           |



|                                                    |                       |                                  |                            |                                                                                                           |                                                                                    |                                                                                     |                                               |                                                                              |
|----------------------------------------------------|-----------------------|----------------------------------|----------------------------|-----------------------------------------------------------------------------------------------------------|------------------------------------------------------------------------------------|-------------------------------------------------------------------------------------|-----------------------------------------------|------------------------------------------------------------------------------|
|                                                    |                       |                                  |                            |                                                                                                           | consistent with a cancer diagnosis                                                 |                                                                                     |                                               |                                                                              |
| Puig <sup>26</sup><br>2012<br>Spain                | 444/2                 | 46.48 +/- 13.6                   | 45.5%/65.5%                | Hospital diagnosed psoriasis                                                                              | Physical examination and laboratory test every three months                        | –                                                                                   | Etanercept                                    | –                                                                            |
| Staumont–Salle <sup>27</sup><br>2012<br>Frankrig   | 306/1                 | Mean 47                          | 104/202                    | Hospital diagnosed psoriasis                                                                              | Not reported                                                                       | –                                                                                   | Biologic– and non–biologic systemic treatment | –                                                                            |
| Stern <sup>67</sup><br>2012<br>USA                 | 1,380/482             | 44 +/- 16                        | 487/893 male               | Hospital diagnosed psoriasis                                                                              | Pathology reports                                                                  | IRR <sub>adj</sub> tumor (CI)<br>32.0 (30.8–33.19) for SCC<br>4.7 (4.5–4.9) for BCC | PUVA                                          | –                                                                            |
| Kimball <sup>30</sup><br>2014<br>USA               | 2,510/66              | 46.3 +/- 13.6                    | 1,194 /1,317               | Patients eligible for etanercept for their psoriasis                                                      | Not reported                                                                       | SIR (CI)<br>0.95 (0.73–1.20)                                                        | Etanercept                                    | –                                                                            |
| Feldman <sup>32</sup><br>2015<br>USA               | 5,492/165<br>5,492/81 | 47.62 +/- 1.65<br>47.62 +/- 1.65 | 2,444/3,048<br>2,444/3,048 | Two diagnoses of psoriasis (ICD–9–code 696.1) from the OptumHealth Reporting and Insights claims database | ICD–O codes for cancer from the OptumHealth Reporting and Insights claims database | OR <sub>adj</sub><br>2.1                                                            | –                                             | Matched controls from the OptumHealth Reporting and Insights claims database |
| Lijnen <sup>33</sup><br>2015<br>The Netherlands    | 176/1                 | 47 +/- 14                        | 74/102                     | Not reported                                                                                              | Not reported                                                                       | –                                                                                   | dimethylfumarate                              | –                                                                            |
| van Lümig <sup>68</sup><br>2015<br>The Netherlands | 280/11<br>448/12      | 46.8 +/- 11.9<br>56.3 +/- 12.9   | 99/181<br>304/144          | Dermatologist                                                                                             | Cytopathology                                                                      | HR <sub>adj</sub> (CI)<br>6.0 (1.6–22.4)                                            | TNF–alpha inhibitors                          | Patients with rheumatoid arthritis, diagnosed by                             |

|                                               |                                 |                                                                               |                                      |                                                                                                              |                                                                                       |                                                                                |                                               |                                                                                |
|-----------------------------------------------|---------------------------------|-------------------------------------------------------------------------------|--------------------------------------|--------------------------------------------------------------------------------------------------------------|---------------------------------------------------------------------------------------|--------------------------------------------------------------------------------|-----------------------------------------------|--------------------------------------------------------------------------------|
|                                               |                                 |                                                                               |                                      |                                                                                                              |                                                                                       |                                                                                |                                               | rheumatologist                                                                 |
| Menter <sup>52</sup><br>2015<br>International | 6,059/112                       | 47.0 +/- 18–94                                                                | 2,566/3,493                          | Dermatologist                                                                                                | Not reported                                                                          | –                                                                              | Adalimumab                                    | –                                                                              |
| Asgari <sup>35</sup><br>2016<br>USA           | 5,889/689                       | 51.00 +/- 15                                                                  | 2,914/2,975                          | ICD–9 code 696.1 and systemic psoriasis treatment in the Kaiser Permanente Northern California database      | ICD–O codes for cancer from Kaiser Permanente Northern California Cancer Registry     | –                                                                              | Biologic– and non–biologic systemic treatment | –                                                                              |
| Dai <sup>69</sup><br>2016<br>USA              | 2,645/287<br>155,289/17,513     | 62.1 +/- 6.5<br>–36.7 +/- 4.7<br>62.6 +/- 6.8<br>–36.1 +/- 4.7                | 2,645                                | Self–reported psoriasis, confirmed using the Psoriasis Screening Tool and validated by mailed questionnaires | SCC: Pathology report, BCC: self–reported                                             | RR <sub>adj</sub> (CI)<br>1.51 (1.11–2.05) for SCC<br>0.95 (0.75–1.18) for BCC | –                                             | Participants in the Nurses Health Studies I and II, who did not have psoriasis |
| Egeberg <sup>70</sup><br>2016<br>Denmark      | 67,257/761<br>5,484,010/57,222  | 44.1 +/- 16.7 mild<br>44.0 +/- 15.7 severe<br>40.3 +/- 19.7 control           | 34,424/32,833<br>2,774,726/2,709,284 | All Danish patients with psoriasis or psoriatic arthritis from the Danish National Patient Register          | (ICD–8 code 173 or ICD–10 code C44) recorded in the Danish National Patient Register. | IRR <sub>adj</sub> (CI)<br>1.98 (1.84–2.15) mild<br>2.30 (1.91–2.78) severe    | –                                             | General population                                                             |
| Esposito <sup>36</sup><br>2016<br>Italy       | 350/1                           | 48.4 +/- 13.1                                                                 | 42%/68 %                             | Hospital diagnosed psoriasis                                                                                 | Not reported                                                                          | –                                                                              | Biologics                                     | –                                                                              |
| Fuxench <sup>37</sup><br>2016<br>UK           | 198,366/3,136<br>937,716/15,978 | 46.21 +/- 17.36 mild<br>49.20 +/- 15.03 moderate<br>49.73 +/- 17.53 reference | 102,541/95,825<br>524,672/413,044    | At least one diagnostic Read code for psoriasis used in The Health Improvement Network (THIN)                | a series of Read codes for cancer used in The Health Improvement Network (THIN)       | HR <sub>adj</sub> (CI)<br>1.12 (1.07–1.16)                                     | –                                             | Reference patients were from same General Practice as subjects                 |
| Maiorino <sup>71</sup><br>2016                | 92/5                            | 53.5 (20–83)                                                                  | 60/32                                | Hospital diagnosed psoriasis                                                                                 | Physical examination                                                                  | –                                                                              | NB–UVB or PUVA                                | –                                                                              |

|                                               |                          |                        |                                |                                                                                                                                                         |                                                                                                                                                                      |                                             |              |                                                         |
|-----------------------------------------------|--------------------------|------------------------|--------------------------------|---------------------------------------------------------------------------------------------------------------------------------------------------------|----------------------------------------------------------------------------------------------------------------------------------------------------------------------|---------------------------------------------|--------------|---------------------------------------------------------|
| Italy                                         |                          |                        |                                |                                                                                                                                                         |                                                                                                                                                                      |                                             |              |                                                         |
| Vergou <sup>38</sup><br>2016<br>Greece        | 93/2                     | Mean 48.7              | 43/50                          | Hospital diagnosed psoriasis                                                                                                                            | Not reported                                                                                                                                                         | –                                           | Ustekisumab  | –                                                       |
| Paradisi <sup>72</sup><br>2017<br>Italy       | 72,739/699<br>25,956/509 | –                      | 37,073/35,666<br>15,801/10,155 | ICD–9–CM codes for psoriasis (i.e. 696.1 and 696.0) from a single Centre database                                                                       | ICD–9–CM codes for keratinocyte cancer (i.e. 173.*) from a single Centre database                                                                                    | OR <sub>adj</sub> (CI)<br>0.84 (0.75–0.95)  | Phototherapy | Vascular surgery patients                               |
| Serrano <sup>73</sup><br>2017<br>USA          | 14,704/768               | (28–89)                | –                              | ICD–9 and –10 codes for psoriasis                                                                                                                       | ICD–9 and –10 codes for cancer                                                                                                                                       | –                                           | –            | –                                                       |
| Avina–Zubieta <sup>74</sup><br>2018<br>Canada | 81,568/401<br>81,568/217 | Mean 48.5<br>Mean 48.5 | 51.5%/49.5%                    | Diagnostic codes for psoriasis (1 by dermatologist, 2 by non–dermatologist or hospitalized with diagnostic code) from an administrative health database | Cancer–registry, British Columbia, Canada                                                                                                                            | IRR <sub>adj</sub> (CI)<br>1.82 (1.54–2.14) | –            | Matched controls from an administrative health database |
| Lin <sup>75</sup><br>2018<br>Taiwan           | 16,531/13                | Mean 44.88             | 5,213/11,318                   | ICD–codes for psoriasis in the Taiwan National Health Insurance Research Database (NHIRD)                                                               | Diagnosed by dermatologist or plastic surgeon via skin biopsy or surgical intervention or included in the Registry for Catastrophic Illness Patient Database (RCIPD) | –                                           | NB–UVB       | –                                                       |

|                                                                                                                         |          |   |   |                                                                                    |                                   |   |                                       |   |
|-------------------------------------------------------------------------------------------------------------------------|----------|---|---|------------------------------------------------------------------------------------|-----------------------------------|---|---------------------------------------|---|
| Mason <sup>76</sup><br>2018<br>UK                                                                                       | 8,860/96 | – | – | Included in BADBIR,<br>a<br>pharmacovigilance<br>register of psoriasis<br>patients | Not reported                      | – | Systemic and<br>biologic<br>therapies | – |
| Raone <sup>77</sup><br>2018<br>Italy                                                                                    | 158/7    | – | – | Review of clinical<br>records                                                      | Histopathological<br>verification | – | NB–UVB                                | – |
| <p>*Excludes basal cell carcinoma</p> <p>**This result was based on a reference group of patients with hypertension</p> |          |   |   |                                                                                    |                                   |   |                                       |   |

**table 1d.** Details of studies included in analysis for melanoma in patients with psoriasis

| Reference/<br>year of publication/<br>country                           | Psoriasis all/<br>psoriasis with<br>cancer/<br>reference all/<br>reference with<br>cancer | Age<br>Psoriasis/reference | Sex<br>Psoriasis<br>females/males/<br>reference<br>females/males | Assessment of<br>psoriasis                                               | Assessment of<br>cancer                                   | Results                                                        | Treatment<br>investigated | Characteristics<br>of reference<br>population |
|-------------------------------------------------------------------------|-------------------------------------------------------------------------------------------|----------------------------|------------------------------------------------------------------|--------------------------------------------------------------------------|-----------------------------------------------------------|----------------------------------------------------------------|---------------------------|-----------------------------------------------|
| Pittelkow <sup>2</sup><br>1981<br>UK                                    | 260/1                                                                                     | –                          | –                                                                | Records from<br>patients<br>hospitalized for<br>psoriasis                | Skin cancer: biopsy<br>Other cancers: Self-<br>reported   | –                                                              | Coal tar                  | –                                             |
| Lindelof <sup>43</sup><br>1990<br>Sweden                                | 20,328/33                                                                                 | Mean 48                    | 11,292/9,036                                                     | The Swedish<br>psoriasis<br>association’s<br>membership<br>registry      | The Swedish<br>National Cancer<br>Registry                | Sir <sub>adj</sub> (CI)<br>1.1 (0.8–1.6)                       | –                         | –                                             |
| Frentz <sup>11</sup> (BJD 141)<br>1999a<br>Denmark                      | 6,905/16                                                                                  | –                          | 3,487/3,418                                                      | ICD–8: 696 from the<br>Danish National<br>hospital discharge<br>register | ICD–O from The<br>National Danish<br>cancer registry      | SIR <sub>adj</sub> (CI)<br>1.3 (0.8–2.1)                       | –                         | –                                             |
| Frentz <sup>12</sup> (BJD 140)<br>1999b<br>Denmark                      | 1,738/2                                                                                   | Mean 43                    | 866/872                                                          | Hospital diagnosed<br>psoriasis                                          | ICD–O from The<br>National Danish<br>cancer registry      | Sir <sub>adj</sub> (CI)<br>1.19 (0.1–<br>6.3)                  | Climatotherap<br>y        | –                                             |
| Hannuksela–<br>Svahn <sup>45</sup> (BJD)<br>1999b<br>Sweden and Finland | 944/2                                                                                     | Mean 43–44                 | 363/581                                                          | Hospital diagnosed<br>psoriasis                                          | The National<br>Swedish and Finnish<br>Cancer Registries  | SIR (CI)<br>0.9 (0.1–3.2)                                      | Trioxalen bath<br>PUVA    | –                                             |
| Lindelof <sup>46</sup><br>1999<br>Sweden                                | 4,799/15                                                                                  | 45,3 (6–93)                | 2456/2343                                                        | Dermatologist                                                            | The National<br>Swedish Cancer<br>Registry                | SIR (CI)<br>Female: 1.1<br>(0.4–2.3)<br>Male: 1.1<br>(0.5–2.2) | PUVA                      | –                                             |
| Hannuksela–<br>Svahn <sup>14</sup><br>2000                              | 5,687/8                                                                                   | –                          | 2,555/3,132                                                      | The national<br>discharge register<br>linked with the                    | Patients were<br>linked to the Finnish<br>National cancer | SIR <sub>adj</sub> (CI)<br>0.8 (0.3–1.6)                       | –                         | –                                             |

| Finland                                     |                        |                                         |                            | Population Central register                                                         | registry via personal identification numbers                                              |                                                |                       |                                                                 |
|---------------------------------------------|------------------------|-----------------------------------------|----------------------------|-------------------------------------------------------------------------------------|-------------------------------------------------------------------------------------------|------------------------------------------------|-----------------------|-----------------------------------------------------------------|
| Stern <sup>78</sup><br>2001<br>USA          | 1,380/23               | 50 +/- 12<br>For those who had melanoma | 849/531                    | Hospital diagnosed psoriasis                                                        | Not reported                                                                              | –                                              | PUVA                  | –                                                               |
| Paul <sup>17</sup><br>2003<br>International | 1,252/2                | 43.3 +/- 14                             | 32%/68%                    | Not reported                                                                        | Malignancies were verified by the investigators                                           | SIR <sub>adj</sub> (CI)<br>2.1 (1.6–2.9)       | Cyclosporine          | –                                                               |
| Weischer <sup>18</sup><br>2004<br>Germany   | 195/1                  | Mean 45.5–47.1                          | 69/126                     | Hospital diagnosed psoriasis                                                        | Review of cancer records from The Regional Interdisciplinary Cancer Centre                | –                                              | Ultraviolet B therapy | –                                                               |
| Hearn <sup>79</sup><br>2008<br>UK           | 2,130/6                | –                                       | –                          | Review of clinical records                                                          | the Scottish Cancer Registry via ICD–O                                                    | SIR <sub>adj</sub> (95–CI)<br>1.05 (0.03–5.86) | NB–UVB                | –                                                               |
| Warren <sup>65</sup><br>2008<br>UK          | 102/2                  | 45 +/- 19                               | 59/43                      | Hospital diagnosed psoriasis                                                        | Physical examination                                                                      |                                                | Biologics             | –                                                               |
| Brauchli <sup>48</sup><br>2009<br>UK        | 33,760/29<br>34,001/33 | –                                       | 53.1%/46.9%<br>53.2%/46.8% | A diagnosis of psoriasis in the UK General Practice Research Database               | A cancer diagnosis in the UK General Practice Research Database and appropriate treatment | IRR <sub>adj</sub> (CI)<br>0.83 (0.50–1.36)    | –                     | Matched controls from the UK General Practice Research Database |
| Ji <sup>49</sup><br>2009<br>Sweden          | 15,858/35              | –                                       | –                          | ICD–7, 8, 9 and 10 codes for psoriasis from the Swedish hospital discharge register | ICD–7 codes for cancer from the Swedish Cancer Registry                                   | Sir <sub>adj</sub> (CI)<br>0.95 (0.66–1.32)    | –                     | –                                                               |
| Brunasso <sup>22</sup><br>2011<br>Italy     | 103/1                  | –                                       | –                          | Review of case files                                                                | Not reported                                                                              | –                                              | Biologics             | –                                                               |

|                                                    |                |                               |                   |                                                                                            |                                                                                                                                                  |                                                  |                                                        |                                                                                 |
|----------------------------------------------------|----------------|-------------------------------|-------------------|--------------------------------------------------------------------------------------------|--------------------------------------------------------------------------------------------------------------------------------------------------|--------------------------------------------------|--------------------------------------------------------|---------------------------------------------------------------------------------|
| García-Dova <sup>24</sup><br>2012<br>Spain         | 1,042/1        | 45 +/- 14                     | 397/645           | Hospital diagnosed<br>psoriasis                                                            | Not reported                                                                                                                                     | –                                                | Biologic – and<br>non-biologic<br>systemic<br>therapy  | –                                                                               |
| Lee <sup>66</sup><br>2012<br>Taiwan                | 7,061/2        | Mean 42.5                     | 3,207/3,854       | ICD-codes in the<br>National Health<br>Insurance Research<br>Database (NHIRD)<br>of Taiwan | ICD-O in the<br>National Health<br>Insurance Research<br>Database (NHIRD)<br>of Taiwan<br>and treatment<br>consistent with a<br>cancer diagnosis | IRR <sub>adj</sub> (CI)<br>6.12 (1.53–<br>24.47) | –                                                      | –                                                                               |
| Puig <sup>26</sup><br>2012<br>Spain                | 444/1          | 46.48 +/- 13.6                | 45.5%/65.5%       | Hospital diagnosed<br>psoriasis                                                            | Physical<br>examination and<br>laboratory test<br>every three months                                                                             | –                                                | Etanercept                                             | –                                                                               |
| Staumont-Salle <sup>27</sup><br>2012<br>Frankrig   | 306/1          | Mean 47                       | 104/202           | Hospital diagnosed<br>psoriasis                                                            | Not reported                                                                                                                                     | –                                                | Biologic– and<br>non-biologic<br>systemic<br>treatment | –                                                                               |
| Le <sup>80</sup><br>2013<br>USA                    | 17,568/158     | Median 55                     | –                 | ICD-codes in the<br>Humedica database                                                      | ICD-O in the<br>Humedica database                                                                                                                | –                                                | systemic<br>treatment                                  | –                                                                               |
| van Lümig <sup>68</sup><br>2015<br>The Netherlands | 280/1<br>448/– | 46.8 +/- 11.9<br>56.3 +/-12.9 | 99/181<br>304/144 | Dermatologist                                                                              | Cytopathology                                                                                                                                    | –                                                | TNF-alpha<br>inhibitors                                | Patients with<br>rheumatoid<br>arthritis,<br>diagnosed by<br>rheumatologis<br>t |
| Menter <sup>52</sup><br>2015<br>International      | 6,059/10       | 47.0 (18–94)                  | 2,566/3,493       | Dermatologist                                                                              | Not reported                                                                                                                                     | –                                                | Adalimumab                                             | –                                                                               |
| Asgari <sup>35</sup><br>2016<br>USA                | 5,889/21       | 51.00 +/- 15                  | 2,914/2,975       | ICD-9 code 696.1<br>and systemic<br>psoriasis treatment                                    | ICD-O codes for<br>cancer from Kaiser                                                                                                            | –                                                | Biologic– and<br>non-biologic                          | –                                                                               |

|                                                   |                                |                                                                               |                                      |                                                                                                           |                                                                                       |                                                                                 |                    |                                                                 |
|---------------------------------------------------|--------------------------------|-------------------------------------------------------------------------------|--------------------------------------|-----------------------------------------------------------------------------------------------------------|---------------------------------------------------------------------------------------|---------------------------------------------------------------------------------|--------------------|-----------------------------------------------------------------|
|                                                   |                                |                                                                               |                                      | in the Kaiser Permanente Northern California database                                                     | Permanente Northern California Cancer Registry                                        |                                                                                 | systemic treatment |                                                                 |
| Egeberg <sup>70</sup><br>2016<br>Denmark          | 67,257/219<br>5,484,010/28,841 | 44.1 +/- 16.7 mild<br>44.0 +/- 15.7 severe<br>40.3 +/- 19.7 control           | 34,424/32,833<br>2,774,726/2,709,284 | All Danish patients with psoriasis or psoriatic arthritis from the Danish National Patient Register       | (ICD-8 code 172 or ICD-10 code C43) recorded in the Danish National Patient Register. | IRR <sub>adj</sub> (CI)<br>1.19 (1.03–1.37) (mild)<br>1.09 (0.75–1.58) (severe) | –                  | General population                                              |
| Fuxench <sup>37</sup><br>2016<br>UK               | 198,366/340<br>937,716/1,587   | 46.21 +/- 17.36 mild<br>49.20 +/- 15.03 moderate<br>49.73 +/- 17.53 reference | 102,541/95,825<br>524,672/413,044    | At least one diagnostic Read code for psoriasis used in The Health Improvement Network (THIN)             | a series of Read codes for cancer used in The Health Improvement Network (THIN)       | HR <sub>adj</sub> (CI)<br>1.15 (1.02–1.30)                                      | –                  | Reference patients were from same General Practice as subjects  |
| LI <sup>53</sup><br>2016<br>USA                   | 1,120/18<br>63,770/380         | 61.0 +/- 6.8<br>60.8 +/- 6.8                                                  | 1,220<br>63,770                      | Self-reported psoriasis, confirmed using the Psoriasis Screening Tool questionnaire                       | Not reported                                                                          | HR <sub>adj</sub> (CI)<br>1.95 (1.21–3.13)                                      | –                  | Participants in the Nurses' Health Study                        |
| Maiorino <sup>71</sup><br>2016<br>Italy           | 92/3                           | 53.5 (20–83)                                                                  | 60/32                                | Hospital diagnosed psoriasis                                                                              | Physical examination                                                                  | –                                                                               | NB-UVB or PUVA     | –                                                               |
| Reddy <sup>81</sup><br>2016<br>USA                | 8,161/62<br>807,604/7,105      | –                                                                             | 4,271/3,890<br>496,730/310,874       | 3 visits with primary diagnosis registered as "psoriasis" in Kaiser Permanente Southern California (KPSC) | ICD-codes for cancer in Kaiser Permanente Southern California (KPSC)                  | –                                                                               | –                  | Matched controls from the Kaiser Permanente Southern California |
| Fiorentino <sup>54</sup><br>2017<br>International | 12,092/28                      | 48 +/- 13.91                                                                  | 5,456/6,636                          | Dermatologist                                                                                             | Cancers were reported by treating dermatologist                                       | –                                                                               | Systemic treatment | –                                                               |



|                                               |                          |                        |              |                                                                                                                                                         |                                                                                                                                                                      |                                                |        |                                                         |
|-----------------------------------------------|--------------------------|------------------------|--------------|---------------------------------------------------------------------------------------------------------------------------------------------------------|----------------------------------------------------------------------------------------------------------------------------------------------------------------------|------------------------------------------------|--------|---------------------------------------------------------|
|                                               |                          |                        |              |                                                                                                                                                         |                                                                                                                                                                      |                                                |        |                                                         |
| Avina-Zubieta <sup>74</sup><br>2018<br>Canada | 81,568/218<br>81,568/200 | Mean 48.5<br>Mean 48.5 | 51.5%/49.5%  | Diagnostic codes for psoriasis (1 by dermatologist, 2 by non-dermatologist or hospitalized with diagnostic code) from an administrative health database | Cancer-registry, British Columbia, Canada                                                                                                                            | IRR <sub>adj</sub> (CI)<br>1.07<br>(0.88–1.29) | –      | Matched controls from an administrative health database |
| Lin <sup>75</sup><br>2018<br>Taiwan           | 16,531/1                 | Mean 44.88             | 5,213/11,318 | ICD-codes for psoriasis in the Taiwan National Health Insurance Research Database (NHIRD)                                                               | Diagnosed by dermatologist or plastic surgeon via skin biopsy or surgical intervention or included in the Registry for Catastrophic Illness Patient Database (RCIPD) | –                                              | NB-UVB | –                                                       |

**table 1e.** Details of studies included in analysis for lymphoma overall in patients with psoriasis

| Reference/<br>year of publication/<br>country         | Psoriasis all/<br>psoriasis with<br>cancer/<br>reference all/<br>reference with<br>cancer | Age<br>Psoriasis/reference | Sex<br>Psoriasis<br>females/males/<br>reference<br>females/males | Assessment of<br>psoriasis                                          | Assessment of<br>cancer                                                            | Results | Treatment<br>investigated | Characteristics<br>of reference<br>population |
|-------------------------------------------------------|-------------------------------------------------------------------------------------------|----------------------------|------------------------------------------------------------------|---------------------------------------------------------------------|------------------------------------------------------------------------------------|---------|---------------------------|-----------------------------------------------|
| Bailin <sup>1</sup><br>1975<br>USA                    | 205/1                                                                                     | –                          | –                                                                | Hospital diagnosed<br>psoriasis                                     | Not reported                                                                       | –       | Methotrexate              | –                                             |
| Pittelkow <sup>2</sup><br>1981<br>UK                  | 260/2                                                                                     | –                          | –                                                                | Records from<br>patients<br>hospitalized for<br>psoriasis           | Skin cancer: biopsy<br>Other cancers: Self-<br>reported                            | –       | Coal tar                  | –                                             |
| Halprin <sup>3</sup><br>1982<br>USA                   | 150/0<br>150/1                                                                            | 62 (24–92)<br>62 (24–92)   | 3/147<br>3/147                                                   | Hospitalized for<br>psoriasis                                       | Skin cancer: biopsy<br>verified<br>Internal cancers:<br>Not reported               | –       | –                         | DM–2–<br>patients                             |
| Nyfors <sup>5</sup><br>1983<br>Denmark                | 248/2                                                                                     | Mean 52                    | 128/120                                                          | Treated for<br>psoriasis and<br>followed by one of<br>the authors   | The National Cancer<br>Registry and<br>personal follow–up                          | –       | Methotrexate              | –                                             |
| Jones <sup>6</sup><br>1985<br>UK                      | 719/2                                                                                     | –                          | 414/305                                                          | Not reported                                                        | Data sources from<br>the West of<br>Scotland cancer<br>registry                    | –       | Tar                       | –                                             |
| Lindelof <sup>43</sup><br>1990<br>Sweden              | 20,328/11                                                                                 | Mean 48                    | 11,292/9,036<br>female                                           | The Swedish<br>psoriasis<br>association’s<br>membership<br>registry | The Swedish<br>National Cancer<br>Registry                                         | –       | –                         | –                                             |
| Hannuksela–<br>Svahn <sup>14</sup><br>2000<br>Finland | 5,687/29                                                                                  | –                          | 2,555/3,132                                                      | The national<br>discharge register<br>linked with the               | Patients were<br>linked to the Finnish<br>National cancer<br>registry via personal | –       | –                         | –                                             |

|                                                                                             |                            |                                                             |                                  |                                                                       |                                                                                                 |                                             |              |                                                                 |
|---------------------------------------------------------------------------------------------|----------------------------|-------------------------------------------------------------|----------------------------------|-----------------------------------------------------------------------|-------------------------------------------------------------------------------------------------|---------------------------------------------|--------------|-----------------------------------------------------------------|
|                                                                                             |                            |                                                             |                                  | Population Central register                                           | identification numbers                                                                          |                                             |              |                                                                 |
| Gelfand <sup>82</sup><br>2003<br>UK                                                         | 2,718/18<br>105,203/258    | Mean 70.63<br>Mean 71.08                                    | 1540/1,178<br>61,412/43,791      | OXMIS–code for psoriasis in the General Practice research database    | OXMIS code for lymphoma the General Practice research database                                  | RR <sub>adj</sub> (CI)<br>2.94 (1.82–4.74)  | –            | Patients in the GPRD who did not have psoriasis                 |
| Paul <sup>17</sup><br>2003<br>International                                                 | 1,252/2                    | 43.3 +/- 14                                                 | 32%/68%                          | Not reported                                                          | Malignancies were verified by the investigators                                                 | SIR <sub>adj</sub> (CI)<br>2.1 (1.6–2.9)    | Cyclosporine | –                                                               |
| Gelfand <sup>83</sup><br>2006<br>UK                                                         | 153,197/248<br>765,950/970 | Mean<br>41.51 (mild)<br>48.51 (severe)<br>35.76 (reference) | 80,518/72,679<br>399,712/366,238 | OXMIS–code for psoriasis in the General Practice research database    | OXMIS code for lymphoma the General Practice research database                                  | HR <sub>adj</sub> (CI)<br>1.35 (1.17–1.55)  | –            | Non–matched controls                                            |
| Stern <sup>84</sup><br>2006<br>USA<br>Supplemented by<br>Stern <sup>85</sup><br>1997<br>USA | 1380/16                    | 59 +/- 13                                                   | 849/531                          | Hospital diagnosed psoriasis                                          | Not reported                                                                                    | –                                           | PUVA         | –                                                               |
| Brauchli <sup>48</sup><br>2009<br>UK                                                        | 33,760/67<br>34,001/36     |                                                             | 53.1%/46.9%<br>53.2%/46.8%       | A diagnosis of psoriasis in the UK General Practice Research Database | A cancer diagnosis in the UK General Practice Research Database and appropriate treatment       | IRR <sub>adj</sub> (CI)<br>1.76 (1.19–2.58) | –            | Matched controls from the UK General Practice Research Database |
| Roelofzen <sup>86</sup><br>2009<br>The Netherlands                                          | 4,315/21                   | Mean 31,1                                                   | 48%/52%                          | Hospital diagnosed psoriasis                                          | Medical files and questionnaires supplemented by record linkage to the National Cancer Registry | –                                           | Coal tar     | –                                                               |

|                                                              |             |                 |              |                                                                                |                                                                                                                             |                                             |                                               |   |
|--------------------------------------------------------------|-------------|-----------------|--------------|--------------------------------------------------------------------------------|-----------------------------------------------------------------------------------------------------------------------------|---------------------------------------------|-----------------------------------------------|---|
| Lee <sup>66</sup><br>2012<br>Taiwan                          | 7,061/8     | Mean 42.5       | 3,207/3,854  | ICD–codes in the National Health Insurance Research Database (NHIRD) of Taiwan | ICD–O in the National Health Insurance Research Database (NHIRD) of Taiwan and treatment consistent with a cancer diagnosis | IRR <sub>adj</sub> (CI)<br>3.61 (1.81–7.22) | –                                             | – |
| Puig <sup>26</sup><br>2012<br>Spain                          | 444/1       | 46.48 +/- 13.6  | 45.5%/65.5%  | Hospital diagnosed psoriasis                                                   | Physical examination and laboratory test every three months                                                                 | –                                           | Etanercept                                    | – |
| Staumont–Salle <sup>27</sup><br>2012<br>Frankrig             | 306/1       | Mean 47         | 104/202      | Hospital diagnosed psoriasis                                                   | Not reported                                                                                                                | –                                           | Biologic– and non–biologic systemic treatment | – |
| Conti <sup>28</sup><br>2013<br>Italy                         | 45/1        | 58.29 +/- 13.12 | 14/31        | Hospital diagnosed psoriasis                                                   | Not reported                                                                                                                | –                                           | Etanercept                                    | – |
| Le <sup>80</sup><br>2013<br>USA                              | 17,568/88   | Median 55       | Not reported | ICD–codes in the Humedica database                                             | ICD–O in the Humedica database                                                                                              | –                                           | systemic treatment                            | – |
| Fallah <sup>87,88</sup><br>Ann Oncol 25<br>2014a,b<br>Sweden | 131,215/310 | –               | 52.8%/47.2   | The Swedish Hospital Discharge Register                                        | The Swedish Cancer Registry                                                                                                 | –                                           | –                                             | – |
| Kimball <sup>30</sup><br>2014<br>USA                         | 2,510/2     | 46.3 +/- 13.6   | 1,194 /1,317 | Patients eligible for etanercept for their psoriasis                           | Not reported                                                                                                                | SIR <sub>adj</sub> (CI)<br>0.46 (0.06–1.67) | Etanercept                                    | – |
| Menter <sup>52</sup><br>2015<br>International                | 6,059/2     | 47.0 (18–94)    | 2,566/3,493  | Dermatologist                                                                  | Not reported                                                                                                                | –                                           | Adalimumab                                    | – |
| Asgari <sup>35</sup><br>2016<br>USA                          | 5,889/21    | 51.00 +/- 15    | 2,914/2,975  | ICD–9 code 696.1 and systemic psoriasis treatment                              | ICD–O codes for cancer from Kaiser                                                                                          | –                                           | Biologic– and non–biologic                    | – |

|                                           |                               |                                                                               |                                   | in the Kaiser Permanente Northern California database                                                                     | Permanente Northern California Cancer Registry                                       |                                            | systemic treatment |                                                                |
|-------------------------------------------|-------------------------------|-------------------------------------------------------------------------------|-----------------------------------|---------------------------------------------------------------------------------------------------------------------------|--------------------------------------------------------------------------------------|--------------------------------------------|--------------------|----------------------------------------------------------------|
| Fuxench <sup>37</sup><br>2016<br>UK       | 198,366/320<br>937,716/1305   | 46.21 +/- 17.36 mild<br>49.20 +/- 15.03 moderate<br>49.73 +/- 17.53 reference | 102,541/95,825<br>524,672/413,044 | At least one diagnostic Read code for psoriasis used in The Health Improvement Network (THIN)                             | a series of Read codes for cancer used in The Health Improvement Network (THIN)      | HR <sub>adj</sub> (CI)<br>1.34 (1.18–1.51) | –                  | Reference patients were from same General Practice as subjects |
| Magnano <sup>55</sup><br>2017<br>Italy    | 359/1                         | Mean 60                                                                       |                                   | Review of clinical records                                                                                                | Not reported                                                                         | –                                          | –                  | –                                                              |
| Kamstrup <sup>89</sup><br>2018<br>Denmark | 58,096/151<br>4,303,731/6,696 | 54.8 +/- 16.1<br>48.6 +/- 18.0                                                | 51.2%/48.8%<br>50.8%/49.2%        | diagnostic code or receipt of at least two prescriptions of topical vitamin D derivatives from administrative registries. | ICD–10 codes for lymphomas                                                           | –                                          | –                  | General population                                             |
| Lee <sup>41</sup><br>2018<br>Korea        | 892,089/539<br>4,460,445/2018 | 48.3 +/- 16.57<br>4.3 +/- 16.57                                               | 430,917/461,172                   | At least two hospital/clinic visits with an ICD–10 code for psoriasis from the National Health Insurance Service database | ICD–10 codes (C00–C96) for cancer in the National Health Insurance Service database  | HR <sub>adj</sub> (CI)<br>1.33 (1.21–1.46) | –                  | Matched controls from National Health Insurance Service        |
| Wu <sup>42</sup><br>2018<br>USA           | 42,794/80                     | –                                                                             | 22,154/20,640                     | 2 ICD–codes for psoriasis, one by a dermatologist, from the Truven Health Analytics                                       | ICD–O codes for cancer from the Truven Health Analytics MarketScan Commercial Claims | –                                          | –                  | –                                                              |

|  |  |  |  |                                                               |                            |  |  |  |
|--|--|--|--|---------------------------------------------------------------|----------------------------|--|--|--|
|  |  |  |  | MarketScan<br>Commercial Claims<br>and Encounters<br>Database | and Encounters<br>Database |  |  |  |
|--|--|--|--|---------------------------------------------------------------|----------------------------|--|--|--|

| table 1f. Details of studies included in analysis for non-Hodgkin's lymphoma in patients with psoriasis |                                                                                           |                                                           |                                                                  |                                                                                         |                                                                                                                 |                                                |                           |                                               |
|---------------------------------------------------------------------------------------------------------|-------------------------------------------------------------------------------------------|-----------------------------------------------------------|------------------------------------------------------------------|-----------------------------------------------------------------------------------------|-----------------------------------------------------------------------------------------------------------------|------------------------------------------------|---------------------------|-----------------------------------------------|
| Reference/<br>year of publication/<br>country                                                           | Psoriasis all/<br>psoriasis with<br>cancer/<br>reference all/<br>reference with<br>cancer | Age<br>Psoriasis/reference                                | Sex<br>Psoriasis<br>females/males/<br>reference<br>females/males | Assessment of<br>psoriasis                                                              | Assessment of<br>cancer                                                                                         | Results                                        | Treatment<br>investigated | Characteristics<br>of reference<br>population |
| Lindelof <sup>43</sup><br>1990<br>Sweden                                                                | 20,328/7                                                                                  | Mean 48                                                   | 11,292/9,036                                                     | The Swedish<br>psoriasis<br>association's<br>membership<br>registry                     | The Swedish<br>National Cancer<br>Registry                                                                      | –                                              | –                         | –                                             |
| Frentz <sup>11</sup> (BJD 141)<br>1999a<br>Denmark                                                      | 6,905/20                                                                                  | –                                                         | 3,487/3,418                                                      | ICD–8: 696 from the<br>Danish National<br>hospital discharge<br>register                | ICD–O from The<br>National Danish<br>cancer registry                                                            | SIR <sub>adj</sub> (CI)<br>1.4 (0.8–2.2)       | –                         | –                                             |
| Hannuksela–<br>Svahn <sup>45</sup> (BJD)<br>1999b<br>Sweden and Finland                                 | 944/5                                                                                     | Mean 43–44                                                | 363/581                                                          | Hospital diagnosed<br>psoriasis                                                         | The National<br>Swedish and Finnish<br>Cancer Registries                                                        | SIR (CI)<br>3.7 (1.2–8.6)                      | Trioxalen bath<br>PUVA    | –                                             |
| Hannuksela–<br>Svahn <sup>14</sup><br>2000<br>Finland                                                   | 5,687/21                                                                                  | –                                                         | 2,555/3,132                                                      | The national<br>discharge register<br>linked with the<br>Population Central<br>register | Patients were<br>linked to the Finnish<br>National cancer<br>registry via personal<br>identification<br>numbers | SIR <sub>adj</sub> (CI)<br>2.2 (1.4–3.4)       | –                         | –                                             |
| Gelfand <sup>83</sup><br>2006<br>UK                                                                     | 153,197/206<br>765,950/810                                                                | Mean<br>41.51 (mild)<br>48.51 (severe)<br>35.76 (Control) | 80,518/72,679<br>399,712/366,238                                 | OXMIS–code for<br>psoriasis in the<br>General Practice<br>research database             | OXMIS code for<br>lymphoma the<br>General Practice<br>research database                                         | HR <sub>adj</sub> (CI)<br>1.14 (0.96–<br>1.35) | –                         | Non–matched<br>controls                       |
| Smith <sup>19</sup><br>2006<br>UK                                                                       | 22/1                                                                                      | 43.4 +/- 11.9                                             | 5/18                                                             | Hospital diagnosed<br>psoriasis                                                         | Not reported                                                                                                    | –                                              | Infliximab                | –                                             |

|                                                                                             |                               |                                |                            |                                                                                                             |                                                                  |                                                 |            |                                                |
|---------------------------------------------------------------------------------------------|-------------------------------|--------------------------------|----------------------------|-------------------------------------------------------------------------------------------------------------|------------------------------------------------------------------|-------------------------------------------------|------------|------------------------------------------------|
| Stern <sup>84</sup><br>2006<br>USA<br>Supplemented by<br>Stern <sup>85</sup><br>1997<br>USA | 1380/14                       | 59 +/- 13                      | 849/531                    | Hospital diagnosed<br>psoriasis                                                                             | Normal follow-up<br>and National death<br>index database         | –                                               | PUVA       | –                                              |
| Ji <sup>49</sup><br>2009<br>Sweden                                                          | 15,858/60                     | –                              | –                          | ICD–7, 8, 9 and 10<br>codes for psoriasis<br>from the Swedish<br>hospital discharge<br>register             | ICD–7 codes for<br>cancer from the<br>Swedish Cancer<br>Registry | SIR <sub>adj</sub> (CI)<br>1.31 (1.00–<br>1.69) | –          | –                                              |
| Conti <sup>28</sup><br>2013<br>Italy                                                        | 45/1                          | 58.29 +/- 13.12                | 14/31                      | Hospital diagnosed<br>psoriasis                                                                             | Not reported                                                     | –                                               | Etanercept | –                                              |
| Fallah <sup>87</sup><br>Ann Oncol 25<br>(2025–2030)<br>2014a<br>Sweden                      | 131,215/275                   | –                              | 52.8%/47.2                 | The Swedish<br>Hospital Discharge<br>Register                                                               | The nationwide<br>Swedish Cancer<br>Registry                     | SIR <sub>adj</sub> (CI)<br>1.4 (1.2–1.6)        | –          | –                                              |
| Li <sup>53</sup><br>2016<br>USA                                                             | 1,120/13<br>63,770/527        | 61.0 +/- 6.8<br>60.8 +/- 6.8   | 1,220<br>63,770            | Self-reported<br>psoriasis, confirmed<br>using the Psoriasis<br>Screening Tool<br>questionnaire             | Not reported                                                     | HR <sub>adj</sub> (CI)<br>1.03 (0.59–<br>1.78)  | –          | Participants in<br>the Nurses'<br>Health Study |
| Magnano <sup>55</sup><br>2017<br>Italy                                                      | 359/1                         | Mean 60                        |                            | Review of clinical<br>records                                                                               | Not reported                                                     | –                                               | –          | –                                              |
| Kamstrup <sup>89</sup><br>2018<br>Denmark                                                   | 58,053/123<br>4,303,731/5,772 | 54.8 +/- 16.1<br>48.6 +/- 18.0 | 51.2%/48.8%<br>50.8%/49.2% | diagnostic code or<br>receipt of at<br>least two<br>prescriptions of<br>topical vitamin D<br>derivates from | ICD–10 codes for<br>lymphomas                                    | HR <sub>adj</sub> (CI)<br>1.02 (0.84–<br>1.24)* | –          | General<br>population                          |



|                                      |  |  |  |                            |  |  |  |  |
|--------------------------------------|--|--|--|----------------------------|--|--|--|--|
|                                      |  |  |  | administrative registries. |  |  |  |  |
| *Excluding cutaneous T-cell lymphoma |  |  |  |                            |  |  |  |  |

**table 1g.** Details of studies included in analysis for Hodgkin’s lymphoma in patients with psoriasis

| Reference/<br>year of publication/<br>country                                               | Psoriasis all/<br>psoriasis with<br>cancer/<br>reference all/<br>reference with<br>cancer | Age<br>Psoriasis/reference                                  | Sex<br>Psoriasis<br>females/males/<br>reference<br>females/males | Assessment of<br>psoriasis                                                              | Assessment of<br>cancer                                                                                         | Results                                        | Treatment<br>investigated | Characteristics<br>of reference<br>population |
|---------------------------------------------------------------------------------------------|-------------------------------------------------------------------------------------------|-------------------------------------------------------------|------------------------------------------------------------------|-----------------------------------------------------------------------------------------|-----------------------------------------------------------------------------------------------------------------|------------------------------------------------|---------------------------|-----------------------------------------------|
| Lindelof <sup>43</sup><br>1990<br>Sweden                                                    | 20,328/4                                                                                  | Mean 48                                                     | 11,292/9,036<br>female                                           | The Swedish<br>psoriasis<br>association’s<br>membership<br>registry                     | The Swedish<br>National Cancer<br>Registry                                                                      | –                                              | –                         | –                                             |
| Olsen <sup>90</sup><br>1992<br>Denmark                                                      | 6910/1                                                                                    | Mean 50                                                     | 3582/3328                                                        | National hospital<br>discharge register                                                 | National cancer<br>registry                                                                                     | SIR <sub>adj</sub> (CI)<br>1.0 (0.1–4.9)       | –                         | –                                             |
| Hannuksela–<br>Svahn <sup>14</sup><br>2000<br>Finland                                       | 5,687/8                                                                                   | –                                                           | 2,555/3,132                                                      | The national<br>discharge register<br>linked with the<br>Population Central<br>register | Patients were<br>linked to the Finnish<br>National cancer<br>registry via personal<br>identification<br>numbers | SIR <sub>adj</sub> (CI)<br>3.3 (1.4–6.4)       | –                         | –                                             |
| Gelfand <sup>83</sup><br>2006<br>UK                                                         | 153,197/42<br>765,950/160                                                                 | Mean<br>41.51 (mild)<br>48.51 (severe)<br>35.76 (Reference) | 80,518/72,679<br>399,712/366,238                                 | OXMIS–code for<br>psoriasis in the<br>General Practice<br>research database             | OXMIS code for<br>lymphoma the<br>General Practice<br>research database                                         | HR <sub>adj</sub> (CI)<br>1.48 (1.05–<br>2.08) | –                         | Non–matched<br>controls                       |
| Stern <sup>84</sup><br>2006<br>USA<br>Supplemented by<br>Stern <sup>85</sup><br>1997<br>USA | 1380/2                                                                                    | 59 +/- 13                                                   | 849/531                                                          | Hospital diagnosed<br>psoriasis                                                         | Normal follow–up<br>and National death<br>index database                                                        | –                                              | PUVA                      | –                                             |
| Laws <sup>91</sup><br>2011<br>UK/Ireland                                                    | 129/1                                                                                     | 46.0 +/- 11.4                                               | 60/69                                                            | Diagnosed at<br>clinical center                                                         | Not reported                                                                                                    | –                                              | Ustekinumab               | –                                             |

|                                                                        |                            |                                |                            |                                                                                                                                              |                                |                                                |   |                       |
|------------------------------------------------------------------------|----------------------------|--------------------------------|----------------------------|----------------------------------------------------------------------------------------------------------------------------------------------|--------------------------------|------------------------------------------------|---|-----------------------|
| Fallah <sup>88</sup><br>Ann Oncol 25<br>(1397–1404)<br>2014b<br>Sweden | 131,215/35                 | –                              | 52.8%/47.2%                | The Swedish<br>Hospital Discharge<br>Register                                                                                                | The Swedish Cancer<br>Registry | SIR <sub>adj</sub> (CI)<br>1.9 (1.3–2.6)       | – | –                     |
| Kamstrup <sup>89</sup><br>2018<br>Denmark                              | 58,096/28<br>4,303,731/924 | 54.8 +/- 16.1<br>48.6 +/- 18.0 | 51.2%/48.8%<br>50.8%/49.2% | diagnostic code or<br>receipt of at<br>least two<br>prescriptions of<br>topical vitamin D<br>derivates from<br>administrative<br>registries. | ICD–10 codes for<br>lymphomas  | HR <sub>adj</sub> (CI)<br>1.50 (1.01–<br>2.23) | – | General<br>population |

**table 1h.** Details of studies included in analysis for breast cancer in patients with psoriasis

| Reference/<br>year of publication/<br>country                           | Psoriasis all/<br>psoriasis with<br>cancer/<br>reference all/<br>reference with<br>cancer | Age<br>Psoriasis/reference | Sex<br>Psoriasis<br>females/males/<br>reference<br>females/males | Assessment of<br>psoriasis                                               | Assessment of<br>cancer                                        | Results                                         | Treatment<br>investigated | Characteristics<br>of reference<br>population |
|-------------------------------------------------------------------------|-------------------------------------------------------------------------------------------|----------------------------|------------------------------------------------------------------|--------------------------------------------------------------------------|----------------------------------------------------------------|-------------------------------------------------|---------------------------|-----------------------------------------------|
| Nyfors <sup>5</sup><br>1983<br>Denmark                                  | 248/2                                                                                     | Mean 52                    | 128/120                                                          | Treated for<br>psoriasis and<br>followed by one of<br>the authors        | The National Cancer<br>Registry and<br>personal follow-up      | –                                               | Methotrexate              | –                                             |
| Lindelof <sup>43</sup><br>1990<br>Sweden                                | 20,328/107                                                                                | Mean 48                    | 11,292/9,036                                                     | The Swedish<br>psoriasis<br>association's<br>membership<br>registry      | The Swedish<br>National Cancer<br>Registry                     | SIR <sub>adj</sub> (CI)<br>1.03 (0.85–<br>1.25) | –                         | –                                             |
| Stern <sup>44</sup><br>1995<br>USA                                      | 956/11                                                                                    | 50 +/- 14                  | 368/588                                                          | Hospital diagnosed<br>psoriasis                                          | Not reported                                                   | –                                               | Etretinate                | –                                             |
| Stern <sup>92</sup><br>1997<br>USA                                      | 1380/27                                                                                   | 44 +/- 16                  | 487/893                                                          | Hospital diagnosed<br>psoriasis                                          | Pathology report,<br>discharge summary<br>or death certificate | RR <sub>adj</sub> (CI)<br>1.81 (1.19–<br>2.64)  | PUVA                      | –                                             |
| Frentz <sup>11</sup> (BJD 141)<br>1999a<br>Denmark                      | 6,905/54                                                                                  | –                          | 3,487/3,418                                                      | ICD–8: 696 from the<br>Danish National<br>hospital discharge<br>register | ICD–O from The<br>National Danish<br>cancer registry           | SIR 0.9                                         | –                         | –                                             |
| Frentz <sup>12</sup> (BJD 140)<br>1999b<br>Denmark                      | 1,738/8                                                                                   | Mean 43                    | 866/872                                                          | Hospital diagnosed<br>psoriasis                                          | ICD–O from The<br>National Danish<br>cancer registry           | SIR <sub>adj</sub> (CI)<br>1.31 (0.6–<br>2.6)   | Climatotherapy            | –                                             |
| Hannuksela–<br>Svahn <sup>45</sup> (BJD)<br>1999b<br>Sweden and Finland | 944/3                                                                                     | Mean 43–44                 | 363/581                                                          | Hospital diagnosed<br>psoriasis                                          | The National<br>Swedish and Finnish<br>Cancer Registries       | SIR (CI)<br>0.7 (0.1–1.9)                       | Trioxalen bath<br>PUVA    | –                                             |
| Hannuksela–<br>Svahn <sup>14</sup>                                      | 5,687/37                                                                                  | –                          | 2,555/3,132                                                      | The national<br>discharge register                                       | Patients were<br>linked to the Finnish                         | SIR <sub>adj</sub> (CI)<br>0.9 (0.6–1.2)        | –                         | –                                             |

|                                                    |                          |                 |                            |                                                                                |                                                                                                                                     |                                                 |              |                                                                                |
|----------------------------------------------------|--------------------------|-----------------|----------------------------|--------------------------------------------------------------------------------|-------------------------------------------------------------------------------------------------------------------------------------|-------------------------------------------------|--------------|--------------------------------------------------------------------------------|
| 2000<br>Finland                                    |                          |                 |                            | linked with the<br>Population Central<br>register                              | National cancer<br>registry via personal<br>identification<br>numbers                                                               |                                                 |              |                                                                                |
| Haustein <sup>15</sup><br>2000<br>Germany          | 157/1                    | Mean 48.3       | 48/109                     | Hospital records of<br>patients with<br>psoriasis                              | Not reported                                                                                                                        | –                                               | Methotrexate | –                                                                              |
| Paul <sup>17</sup><br>2003<br>International        | 1,252/2                  | 43.3 +/- 14     | 32%/68%                    | Not reported                                                                   | Malignancies were<br>verified by the<br>investigators                                                                               | SIR <sub>adj</sub> (CI)<br>2.1 (1.6–2.9)        | Cyclosporine | –                                                                              |
| Brauchli <sup>48</sup><br>2009<br>UK               | 33,760/153<br>34,001/139 |                 | 53.1%/46.9%<br>53.2%/46.8% | A diagnosis of<br>psoriasis in the UK<br>General Practice<br>Research Database | A cancer diagnosis<br>in the UK General<br>Practice Research<br>Database and<br>appropriate<br>treatment                            | IRR <sub>adj</sub> (CI)<br>1.04 (0.83–<br>1.31) | –            | Matched<br>controls from<br>the UK General<br>Practice<br>Research<br>Database |
| Roelofzen <sup>86</sup><br>2009<br>The Netherlands | 4,315/83                 | Mean 31.1       | 48%/52%                    | Diagnosed with<br>psoriasis at a<br>hospital                                   | Assessed through<br>medical files and<br>questionnaires,<br>supplemented by<br>record linkage to<br>the National Cancer<br>Registry | HR <sub>adj</sub> (CI)<br>03 (0.43–<br>2.50)    | Coal tar     | –                                                                              |
| Antoniou <sup>21</sup><br>2010<br>Greece           | 118/1                    | 49 (19–80)      | 36/82                      | Hospital diagnosed<br>psoriasis                                                | Not reported                                                                                                                        | –                                               | Etanercept   | –                                                                              |
| Chen <sup>93</sup><br>2011<br>Taiwan               | 3,686/3                  | 44.00 +/- 19.62 | 1,445/2,241                | ICD–codes from the<br>Longitudinal Health<br>Insurance Database                | “Cancer<br>catastrophic illness<br>certificate”, which<br>requires cytological<br>or pathological<br>evidence                       | –                                               | –            | –                                                                              |
| van Lümig <sup>23</sup><br>2011<br>The Netherlands | 173/1                    | 50.6 +/- 12.1   | 64/109                     | Hospital diagnosed<br>psoriasis                                                | Not reported                                                                                                                        | SIR <sub>adj</sub> (CI)<br>2.7 (0.1–<br>15.1)   | Biologics    | –                                                                              |

|                                                               |                               |                                                                                        |                                   |                                                                                                              |                                                                                             |                                                 |                                                        |                                                                               |
|---------------------------------------------------------------|-------------------------------|----------------------------------------------------------------------------------------|-----------------------------------|--------------------------------------------------------------------------------------------------------------|---------------------------------------------------------------------------------------------|-------------------------------------------------|--------------------------------------------------------|-------------------------------------------------------------------------------|
|                                                               |                               |                                                                                        |                                   |                                                                                                              |                                                                                             |                                                 |                                                        |                                                                               |
| Prizment <sup>50</sup><br>2011<br>USA                         | 719/29<br>32,191/2,037        | 67.8 +/- 3<br>68.1 +/- 3.2                                                             | 719<br>32,191                     | (ICD-9) code 696.1<br>from Medicare<br>claims of<br>participants in the<br>Iowa's Women's<br>Health Study    | ICD-O codes from<br>the State Health<br>Registry of Iowa                                    | HR <sub>adj</sub> (CI)<br>1.0 (0.7-1.5)         | -                                                      | Participants in<br>the Iowa's<br>Women's<br>Health Study                      |
| Garcia-Dova <sup>24</sup><br>2012<br>Spain                    | 1,042/2                       | 45 +/- 14                                                                              | 397/645                           | Hospital diagnosed<br>psoriasis                                                                              | Not reported                                                                                | -                                               | Biologic - and<br>non-biologic<br>systemic<br>therapy  | -                                                                             |
| Hemminki <sup>94</sup><br>(Gynecol Oncol.)<br>2012a<br>Sweden | 8,162/258                     | -                                                                                      | 8,162                             | The Swedish<br>Hospital Discharge<br>Register                                                                | The Swedish Cancer<br>Registry                                                              | SIR <sub>adj</sub> (CI)<br>1.09 (0.96-<br>1.23) | -                                                      | -                                                                             |
| Staumont-Salle <sup>27</sup><br>2012<br>Frankrig              | 306/2                         | Mean 47                                                                                | 104/202                           | Hospital diagnosed<br>psoriasis                                                                              | Not reported                                                                                | -                                               | Biologic- and<br>non-biologic<br>systemic<br>treatment | -                                                                             |
| Lijnen <sup>33</sup><br>2015<br>The Netherlands               | 176/2                         | 47 +/- 14                                                                              | 74/102                            | Not reported                                                                                                 | Not reported                                                                                | -                                               | dimethylfumar<br>ate                                   | -                                                                             |
| Esposito <sup>36</sup><br>2016<br>Italy                       | 350/1                         | 48.4 +/- 13.1                                                                          | 42%/68 %                          | Hospital diagnosed<br>psoriasis                                                                              | Not reported                                                                                | -                                               | dimethylfumar<br>ate                                   | -                                                                             |
| Fuxench <sup>37</sup><br>2016<br>UK                           | 198,366/1,118<br>937,716/6281 | 46.21 +/- 17.36<br>mild<br>49.20 +/- 15.03<br>moderate<br>49.73 +/- 17.53<br>reference | 102,541/95,825<br>524,672/413,044 | At least one<br>diagnostic Read<br>code for psoriasis<br>used in The Health<br>Improvement<br>Network (THIN) | a series of Read<br>codes for cancer<br>used in The Health<br>Improvement<br>Network (THIN) | -                                               | Biologics                                              | Reference<br>patients were<br>from same<br>General<br>Practice as<br>subjects |
| LI <sup>53</sup><br>2016<br>USA                               | 1,120/86<br>63,770/4,034      | 61.0 +/- 6.8<br>60.8 +/- 6.8                                                           | 1,220<br>63,770                   | Self-reported<br>psoriasis, confirmed                                                                        | Not reported                                                                                | HR <sub>adj</sub> (CI)<br>1.04 (0.97-<br>1.12)  | -                                                      | Participants in<br>the Nurses'<br>Health Study                                |

|                                                   |                                  |                                 |                 |                                                                                                                                          |                                                                                                              |                                            |                    |                                                         |
|---------------------------------------------------|----------------------------------|---------------------------------|-----------------|------------------------------------------------------------------------------------------------------------------------------------------|--------------------------------------------------------------------------------------------------------------|--------------------------------------------|--------------------|---------------------------------------------------------|
|                                                   |                                  |                                 |                 | using the Psoriasis Screening Tool questionnaire                                                                                         |                                                                                                              |                                            |                    |                                                         |
| Fiorentino <sup>54</sup><br>2017<br>International | 12,092/40                        | 48 +/- 13.91                    | 5,456/6,636     | Dermatologist                                                                                                                            | Cancers were reported by treating dermatologist                                                              | -                                          | Systemic treatment | -                                                       |
| Lee <sup>41</sup><br>2018<br>Korea                | 892,089/1,643<br>4,460,445/8,069 | 48.3 +/- 16.57<br>4.3 +/- 16.57 | 430,917/461,172 | At least two hospital/clinic visits with an ICD-10 code for psoriasis from the National Health Insurance Service database                | ICD-10 codes (C00-C96) for cancer in the National Health Insurance Service database                          | HR <sub>adj</sub> (CI)<br>1.02 (0.97-1.08) | -                  | Matched controls from National Health Insurance Service |
| Wu <sup>42</sup><br>2018<br>USA                   | 42,794/59                        | -                               | 22,154/20,640   | 2 ICD-codes for psoriasis, one by a dermatologist, from the Truven Health Analytics MarketScan Commercial Claims and Encounters Database | ICD-O codes for cancer from the Truven Health Analytics MarketScan Commercial Claims and Encounters Database | -                                          | -                  | -                                                       |

**table 1i.** Details of studies included in analysis for lung cancer in patients with psoriasis

| Reference/<br>year of publication/<br>country | Psoriasis all/<br>psoriasis with<br>cancer/<br>reference all/<br>reference with<br>cancer | Age<br>Psoriasis/reference | Sex<br>Psoriasis<br>females/males/<br>reference<br>females/males | Assessment of<br>psoriasis                                | Assessment of<br>cancer                                              | Results                       | Treatment<br>investigated | Characteristics<br>of reference<br>population |
|-----------------------------------------------|-------------------------------------------------------------------------------------------|----------------------------|------------------------------------------------------------------|-----------------------------------------------------------|----------------------------------------------------------------------|-------------------------------|---------------------------|-----------------------------------------------|
| Bailin <sup>1</sup><br>1975<br>USA            | 205/1                                                                                     | –                          | –                                                                | Hospital diagnosed<br>psoriasis                           | Not reported                                                         | –                             | Methotrexate              | –                                             |
| Pittelkow <sup>2</sup><br>1981<br>UK          | 260/6                                                                                     | –                          | –                                                                | Records from<br>patients<br>hospitalized for<br>psoriasis | Skin cancer: biopsy<br>Other cancers: Self-<br>reported              | –                             | Coal tar                  | –                                             |
| Halprin <sup>3</sup><br>1982<br>USA           | 150/0<br>150/4                                                                            | 62 (24–92)<br>62 (24–92)   | 3/147<br>3/147                                                   | Hospitalized for<br>psoriasis                             | Skin cancer: biopsy<br>verified<br>Internal cancers:<br>Not reported | –                             | –                         | DM–2–<br>patients                             |
| Alderson <sup>4</sup><br>1983<br>Scotland     | 8405/83                                                                                   | –                          | –                                                                | Discharge records<br>with a psoriasis<br>diagnosis        | ICD–O from the<br>Scottish National<br>cancer registry               | SIR (P–value)<br>0.97 (<0.09) | –                         | –                                             |
| Jones <sup>6</sup><br>1985<br>UK              | 719/5                                                                                     | –                          | 414/305                                                          | Not reported                                              | Data sources from<br>the West of<br>Scotland cancer<br>registry      | –                             | Tar                       | –                                             |
| Liu <sup>8</sup><br>1989<br>Shanghai          | 344/1                                                                                     | 11–80                      | 136/208                                                          | Hospital diagnosed<br>psoriasis                           | Not reported                                                         | –                             | –                         | –                                             |
| Stern <sup>44</sup><br>1995<br>USA            | 956/8                                                                                     | 50 +/- 14                  | 368/588                                                          | Hospital diagnosed<br>psoriasis                           | Not reported                                                         | –                             | Etretinate                | –                                             |
| Grossman <sup>10</sup><br>1996<br>Frankrig    | 122/2                                                                                     | –                          | –                                                                | Review of hospital<br>records                             | Not reported                                                         | –                             | Cyclosporin               | –                                             |



|                                                                     |                         |             |                            |                                                                             |                                                                                                  |                                             |                        |                                                                 |
|---------------------------------------------------------------------|-------------------------|-------------|----------------------------|-----------------------------------------------------------------------------|--------------------------------------------------------------------------------------------------|---------------------------------------------|------------------------|-----------------------------------------------------------------|
| Frentz <sup>11</sup> (BJD 141)<br>1999a<br>Denmark                  | 6,905/133               | –           | 3,487/3,418                | ICD–8: 696 from the Danish National hospital discharge register             | ICD–O from The National Danish cancer registry                                                   | SIR <sub>adj</sub> (CI)<br>1.5 (1.3–1.9)    | –                      | –                                                               |
| Frentz <sup>12</sup> (BJD 140)<br>1999b<br>Denmark                  | 1738/8                  | Mean 43     | 866/872                    | Hospital diagnosed psoriasis                                                | ICD–O from The National Danish cancer registry                                                   | SIR <sub>adj</sub> (CI)<br>1.18 (0.5–2.3)   | Climatotherapy         | –                                                               |
| Hannuksela–Svahn <sup>45</sup> (BJD)<br>1999b<br>Sweden and Finland | 944/8                   | Mean 43–44  | 363/581                    | Hospital diagnosed psoriasis                                                | The National Swedish and Finnish Cancer Registries                                               | SIR (CI)<br>1.0 (0.4–2.0)                   | Trioxalen bath<br>PUVA | –                                                               |
| Hannuksela–Svahn <sup>14</sup><br>2000<br>Finland                   | 5,687/101               | –           | 2,555/3,132                | The national discharge register linked with the Population Central register | Patients were linked to the Finnish National cancer registry via personal identification numbers | SIR <sub>adj</sub> (CI)<br>1.5 (1.2–1.8)    | –                      | –                                                               |
| Haustein <sup>15</sup><br>2000<br>Germany                           | 157/1                   | Mean 48.3   | 48/109                     | Hospital records of patients with psoriasis                                 | Not reported                                                                                     | –                                           | Methotrexate           | –                                                               |
| Paul <sup>17</sup><br>2003<br>International                         | 1,252/2                 | 43.3 +/- 14 | 32%/68%                    | Not reported                                                                | Malignancies were verified by the investigators                                                  | SIR <sub>adj</sub> (CI)<br>2.1 (1.6–2.9)    | Cyclosporine           | –                                                               |
| Väkevä <sup>47</sup><br>2008<br>Finland                             | 63/1                    | –           | –                          | Dermatologist                                                               | The Finnish Cancer Registry                                                                      | –                                           | Cyclosporine           | –                                                               |
| Brauchli <sup>48</sup><br>2009<br>UK                                | 33,760/85<br>34,001/101 | –           | 53.1%/46.9%<br>53.2%/46.8% | A diagnosis of psoriasis in the UK General Practice Research Database       | A cancer diagnosis in the UK General Practice Research Database and appropriate treatment        | IRR <sub>adj</sub> (CI)<br>0.79 (0.60–1.06) | –                      | Matched controls from the UK General Practice Research Database |
| Ji <sup>49</sup><br>2009<br>Sweden                                  | 15,858/150              | –           | –                          | ICD–7, 8, 9 and 10 codes for psoriasis from the Swedish                     | ICD–7 codes for cancer from the                                                                  | SIR <sub>adj</sub> (CI)<br>1.78 (1.51–2.09) | –                      | –                                                               |

|                                                    |                              |                            |                                   |                                                                                            |                                                                                                                   |                                              |                                               |                                                 |
|----------------------------------------------------|------------------------------|----------------------------|-----------------------------------|--------------------------------------------------------------------------------------------|-------------------------------------------------------------------------------------------------------------------|----------------------------------------------|-----------------------------------------------|-------------------------------------------------|
|                                                    |                              |                            |                                   | hospital discharge register                                                                | Swedish Cancer Registry                                                                                           |                                              |                                               |                                                 |
| Roelofzen <sup>86</sup><br>2009<br>The Netherlands | 4,315/83                     | Mean 31.1                  | 48%/52%                           | Diagnosed with psoriasis at a hospital                                                     | Assessed through medical files and questionnaires, supplemented by record linkage to the National Cancer Registry | HR <sub>adj</sub> (CI)<br>0.97 (0.38–2.46)   | Coal tar                                      | –                                               |
| Antoniou <sup>21</sup><br>2010<br>Greece           | 118/1                        | 49 (19–80)                 | 36/82                             | Hospital diagnosed psoriasis                                                               | Not reported                                                                                                      | –                                            | Etanercept                                    | –                                               |
| Brunasso <sup>22</sup><br>2011<br>Italy            | 103/2                        | –                          | –                                 | Review of case files                                                                       | Not reported                                                                                                      | SIR <sub>adj</sub> (CI)<br>5.92 (0.72–21.37) | Biologics                                     | –                                               |
| Prizment <sup>50</sup><br>2011<br>USA              | 719/20<br>32,191/722         | 67.8 +/- 3<br>68.1 +/- 3.2 | 719<br>32,191                     | (ICD–9) code 696.1 from Medicare claims of participants in the Iowa’s Women’s Health Study | ICD–O codes from the State Health Registry of Iowa                                                                | HR <sub>adj</sub> 1.3<br>(0.8–2.0)           | –                                             | Participants in the Iowa’s Women’s Health Study |
| Garcia–Dova <sup>24</sup><br>2012<br>Spain         | 1,042/3                      | 45 +/- 14                  | 397/645                           | Hospital diagnosed psoriasis                                                               | Not reported                                                                                                      | –                                            | Biologic – and non–biologic systemic therapy  | –                                               |
| Staumont–Salle <sup>27</sup><br>2012<br>France     | 306/8                        | Mean 47                    | 104/202                           | Hospital diagnosed psoriasis                                                               | Not reported                                                                                                      | –                                            | Biologic– and non–biologic systemic treatment | –                                               |
| Le <sup>80</sup><br>2013<br>USA                    | 17,568/211                   | Median 55                  | Not reported                      | ICD–codes in the Humedica database                                                         | ICD–O in the Humedica database                                                                                    | –                                            | systemic treatment                            | –                                               |
| Fuxench <sup>37</sup><br>2016                      | 198,366/497<br>937,716/2,128 | 46.21 +/- 17.36<br>mild    | 102,541/95,825<br>524,672/413,044 | At least one diagnostic Read                                                               | a series of Read codes for cancer                                                                                 | HR <sub>adj</sub> (CI)                       | –                                             | Reference patients were                         |

|                                                   |                                   |                                                             |                 |                                                                                                                                                                                 |                                                                                                  |                                                    |                       |                                                                        |
|---------------------------------------------------|-----------------------------------|-------------------------------------------------------------|-----------------|---------------------------------------------------------------------------------------------------------------------------------------------------------------------------------|--------------------------------------------------------------------------------------------------|----------------------------------------------------|-----------------------|------------------------------------------------------------------------|
| UK                                                |                                   | 49.20 +/- 15.03<br>moderate<br>49.73 +/- 17.53<br>reference |                 | code for psoriasis<br>used in The Health<br>Improvement<br>Network (THIN)                                                                                                       | used in The Health<br>Improvement<br>Network (THIN)                                              | 1.15 (1.03–<br>1.27)                               |                       | from same<br>General<br>Practice as<br>subjects                        |
| LI <sup>53</sup><br>2016<br>USA                   | 1,120/14<br>63,770/429            | 61.0 +/- 6.8<br>60.8 +/- 6.8                                | 1,220<br>63,770 | Self-reported<br>psoriasis, confirmed<br>using the Psoriasis<br>Screening Tool<br>questionnaire                                                                                 | Not reported                                                                                     | HR <sub>adj</sub> (CI)<br>1.05 (0.61–<br>1.79)     | –                     | Participants in<br>the Nurses’<br>Health Study                         |
| Fiorentino <sup>54</sup><br>2017<br>International | 12,092/29                         | 48 +/- 13.91                                                | 5,456/6,636     | Dermatologist                                                                                                                                                                   | Cancers were<br>reported by treating<br>dermatologist                                            | –                                                  | Systemic<br>treatment | –                                                                      |
| Avina–Zubieta <sup>74</sup><br>2018<br>Canada     | 81,568/705<br>81,568/589          | Mean 48.5<br>Mean 48.5                                      | 51.5%/49.5%     | Diagnostic codes for<br>psoriasis (1 by<br>dermatologist, 2 by<br>non–dermatologist<br>or hospitalized with<br>diagnostic code)<br>from an<br>administrative<br>health database | Cancer–registry,<br>British Columbia,<br>Canada                                                  | IRR <sub>adj</sub> (CI)<br>1.17<br>(1.05–<br>1.31) | –                     | Matched<br>controls from<br>an<br>administrative<br>health<br>database |
| Lee <sup>41</sup><br>2018<br>Korea                | 892,089/2,596<br>4,460,445/11,096 | 48.3 +/- 16.57<br>4.3 +/- 16.57                             | 430,917/461,172 | At least two<br>hospital/clinic visits<br>with an ICD–10<br>code for psoriasis<br>from the National<br>Health Insurance<br>Service database                                     | ICD–10 codes (C00–<br>C96) for cancer in<br>the National Health<br>Insurance Service<br>database | HR <sub>adj</sub> (CI)<br>1.16 (1.11–<br>1.21)     | –                     | Matched<br>controls from<br>National<br>Health<br>Insurance<br>Service |

| table 1j. Details of studies included in analysis for colon cancer in patients with psoriasis |                                                                                           |                            |                                                                  |                                                                          |                                                                            |                                               |                           |                                               |
|-----------------------------------------------------------------------------------------------|-------------------------------------------------------------------------------------------|----------------------------|------------------------------------------------------------------|--------------------------------------------------------------------------|----------------------------------------------------------------------------|-----------------------------------------------|---------------------------|-----------------------------------------------|
| Reference/<br>year of publication/<br>country                                                 | Psoriasis all/<br>psoriasis with<br>cancer/<br>reference all/<br>reference with<br>cancer | Age<br>Psoriasis/reference | Sex<br>Psoriasis<br>females/males/<br>reference<br>females/males | Assessment of<br>psoriasis                                               | Assessment of<br>cancer                                                    | Results                                       | Treatment<br>investigated | Characteristics<br>of reference<br>population |
| Pittelkow <sup>2</sup><br>1981<br>UK                                                          | 260/2                                                                                     | –                          | –                                                                | Records from<br>patients<br>hospitalized for<br>psoriasis                | Skin cancer: biopsy<br>Other cancers: Self-<br>reported                    | –                                             | Coal tar                  | –                                             |
| Jones <sup>6</sup><br>1985<br>UK                                                              | 719/6                                                                                     | –                          | 414/305                                                          | Not reported                                                             | Data sources from<br>the West of<br>Scotland cancer<br>registry            | –                                             | Tar                       | –                                             |
| Stern <sup>95</sup><br>1988<br>USA                                                            | 1,380/15                                                                                  | 50 +/- 14                  | 368/588                                                          | Hospital diagnosed<br>psoriasis                                          | Patient interviews,<br>medical records and<br>interviews of next<br>of kin | SIR <sub>adj</sub> (CI)<br>2.06 (1.3–<br>3.2) | PUVA                      | –                                             |
| Lindelof <sup>43</sup><br>1990<br>Sweden                                                      | 20,328/24                                                                                 | Mean 48                    | 11,292/9,036<br>female                                           | The Swedish<br>psoriasis<br>association's<br>membership<br>registry      | The Swedish<br>National Cancer<br>Registry                                 | –                                             | –                         | –                                             |
| Grossman <sup>10</sup><br>1996<br>Frankrig                                                    | 122/1                                                                                     | –                          | –                                                                | Review of hospital<br>records                                            | Not reported                                                               | –                                             | Cyclosporin               | –                                             |
| Frentz <sup>11</sup> (BJD 141)<br>1999a<br>Denmark                                            | 6,905/60                                                                                  | –                          | 3,487/3,418                                                      | ICD–8: 696 from the<br>Danish National<br>hospital discharge<br>register | ICD–O from The<br>National Danish<br>cancer registry                       | SIR <sub>adj</sub> (CI)<br>1.3 (1.0–1.6)      | –                         | –                                             |
| Frentz <sup>12</sup> (BJD 140)<br>1999b<br>Denmark                                            | 1738/3                                                                                    | Mean 43                    | 866/872                                                          | Hospital diagnosed<br>psoriasis                                          | ICD–O from The<br>National Danish<br>cancer registry                       | SIR <sub>adj</sub> (CI)<br>0.86 (0.2–<br>2.5) | Climatotherap<br>y        | –                                             |

|                                                                  |                          |                            |               |                                                                                            |                                                                                                  |                                                 |                        |                                                 |
|------------------------------------------------------------------|--------------------------|----------------------------|---------------|--------------------------------------------------------------------------------------------|--------------------------------------------------------------------------------------------------|-------------------------------------------------|------------------------|-------------------------------------------------|
| Hannuksela-Svahn <sup>45</sup> (BJD) 1999b<br>Sweden and Finland | 944/3                    | Mean 43–44                 | 363/581       | Hospital diagnosed psoriasis                                                               | The National Swedish and Finnish Cancer Registries                                               | SIR (CI)<br>0.9 (0.2–2.7)                       | Trioxalen bath<br>PUVA | –                                               |
| Hannuksela-Svahn <sup>14</sup> 2000<br>Finland                   | 5,687/20                 | –                          | 2,555/3,132   | The national discharge register linked with the Population Central register                | Patients were linked to the Finnish National cancer registry via personal identification numbers | SIR <sub>adj</sub> (CI)<br>0.9 (0.5–1.3)        | –                      | –                                               |
| Paul <sup>17</sup> 2003<br>International                         | 1,252/3                  | 43.3 +/- 14                | 32%/68%       | Not reported                                                                               | Malignancies were verified by the investigators                                                  | SIR <sub>adj</sub> (CI)<br>2.1 (1.6–2.9)        | Cyclosporine           | –                                               |
| Ji <sup>49</sup> 2009<br>Sweden                                  | 15,858/82                | –                          | –             | ICD–7, 8, 9 and 10 codes for psoriasis from the Swedish hospital discharge register        | ICD–7 codes for cancer from the Swedish Cancer Registry                                          | SIR <sub>adj</sub> (CI)<br>1.03 (0.82–1.27)     | –                      | –                                               |
| Brunasso <sup>22</sup> 2011<br>Italy                             | 103/1                    | –                          | –             | Review of case files                                                                       | Not reported                                                                                     | SIR <sub>adj</sub> (CI)<br>7.13<br>(0.18–39.73) | Biologics              | –                                               |
| Hemminki <sup>96</sup> (Ann Oncol.) 2012b<br>Sweden              | 222,027 person-years/112 | –                          | –             | The Swedish Hospital Discharge Register                                                    | The Swedish Cancer Registry                                                                      | SIR <sub>adj</sub> (CI)<br>2.19 (0.98–1.44)     | –                      | –                                               |
| van Lümig <sup>23</sup> 2011<br>The Netherlands                  | 173/1                    | 50.6 +/- 12.1              | 64/109        | Hospital diagnosed psoriasis                                                               | Not reported                                                                                     | –                                               | Biologics              | –                                               |
| Prizment <sup>50</sup> 2011<br>USA                               | 719/22<br>32,191/925     | 67.8 +/- 3<br>68.1 +/- 3.2 | 719<br>32,191 | (ICD–9) code 696.1 from Medicare claims of participants in the Iowa’s Women’s Health Study | ICD–O codes from the State Health Registry of Iowa                                               | HR <sub>adj</sub> 1.6<br>(1.0–2.4)              | –                      | Participants in the Iowa’s Women’s Health Study |

|                                               |                              |                                                                               |                                   |                                                                                                                                                         |                                                                                 |                                             |                    |                                                                |
|-----------------------------------------------|------------------------------|-------------------------------------------------------------------------------|-----------------------------------|---------------------------------------------------------------------------------------------------------------------------------------------------------|---------------------------------------------------------------------------------|---------------------------------------------|--------------------|----------------------------------------------------------------|
| Lan <sup>25</sup><br>2012<br>Taiwan           | 8,180/61<br>163,600/930      | 47.5 +/- 17.3<br>47.4 +/- 17.3                                                | 3,738/4,442<br>74,760/88,840      | ICD-9 codes for psoriasis from The National Health Insurance Program database                                                                           | ICD-O codes for cancer from The National Health Insurance Program database      | -                                           | -                  | Matched controls                                               |
| Puig <sup>26</sup><br>2012<br>Spain           | 444/2                        | 46.48 +/- 13.6                                                                | 45.5%/65.5%                       | Hospital diagnosed psoriasis                                                                                                                            | Physical examination and laboratory test every three months                     | -                                           | Etanercept         | -                                                              |
| Le <sup>80</sup><br>2013<br>USA               | 17,568/193                   | Median 55                                                                     | Not reported                      | ICD-codes for psoriasis in the Humedica database                                                                                                        | ICD-O for cancer in the Humedica database                                       | -                                           | systemic treatment | -                                                              |
| Fuxench <sup>37</sup><br>2016<br>UK           | 198,366/629<br>937,716/3,080 | 46.21 +/- 17.36 mild<br>49.20 +/- 15.03 moderate<br>49.73 +/- 17.53 reference | 102,541/95,825<br>524,672/413,044 | At least one diagnostic Read code for psoriasis used in The Health Improvement Network (THIN)                                                           | a series of Read codes for cancer used in The Health Improvement Network (THIN) | HR <sub>adj</sub> (CI)<br>1.08 (0.98-1.20)  | -                  | Reference patients were from same General Practice as subjects |
| Avina-Zubieta <sup>74</sup><br>2018<br>Canada | 81,568/286<br>81,568/332     | Mean 48.5<br>Mean 48.5                                                        | 51.5%/49.5%                       | Diagnostic codes for psoriasis (1 by dermatologist, 2 by non-dermatologist or hospitalized with diagnostic code) from an administrative health database | Cancer-registry, British Columbia, Canada                                       | IRR <sub>adj</sub> (CI)<br>0.84 (0.72-0.99) | -                  | Matched controls from an administrative health database        |

| table 1k. Details of studies included in analysis for rectal cancer in patients with psoriasis |                                                                                           |                                |                                                                  |                                                                                                 |                                                                            |                                                 |                           |                                               |
|------------------------------------------------------------------------------------------------|-------------------------------------------------------------------------------------------|--------------------------------|------------------------------------------------------------------|-------------------------------------------------------------------------------------------------|----------------------------------------------------------------------------|-------------------------------------------------|---------------------------|-----------------------------------------------|
| Reference/<br>year of publication/<br>country                                                  | Psoriasis all/<br>psoriasis with<br>cancer/<br>reference all/<br>reference with<br>cancer | Age<br>Psoriasis/reference     | Sex<br>Psoriasis<br>females/males/<br>reference<br>females/males | Assessment of<br>psoriasis                                                                      | Assessment of<br>cancer                                                    | Results                                         | Treatment<br>investigated | Characteristics<br>of reference<br>population |
| Stern <sup>95</sup><br>1988<br>USA                                                             | 1,380/6                                                                                   | 50 +/- 14                      | 368/588                                                          | Hospital diagnosed<br>psoriasis                                                                 | Patient interviews,<br>medical records and<br>interviews of next<br>of kin | SIR <sub>adj</sub> (CI)<br>1.67 (0.8–<br>3.1)   | PUVA                      | –                                             |
| Lindelof <sup>43</sup><br>1990<br>Sweden                                                       | 20,328/19                                                                                 | Mean 48                        | 11,292/9,036                                                     | The Swedish<br>psoriasis<br>association's<br>membership<br>registry                             | The Swedish<br>National Cancer<br>Registry                                 | –                                               | –                         | –                                             |
| Frentz <sup>11</sup> (BJD 141)<br>1999a<br>Denmark                                             | 6,905/24                                                                                  | –                              | 3,487/3,418                                                      | ICD–8: 696 from the<br>Danish National<br>hospital discharge<br>register                        | ICD–O from The<br>National Danish<br>cancer registry                       | SIR <sub>adj</sub> (CI)<br>0.9 (0.6–1.4)        | –                         | –                                             |
| Hannuksela–<br>Svahn <sup>45</sup> (BJD)<br>1999b<br>Sweden and Finland                        | 944/3                                                                                     | Mean 43–44                     | 363/581                                                          | Hospital diagnosed<br>psoriasis                                                                 | The National<br>Swedish and Finnish<br>Cancer Registries                   | SIR (CI)<br>1.3 (0.3–3.8)                       | Trioxalen bath<br>PUVA    | –                                             |
| Ji <sup>49</sup><br>2009<br>Sweden                                                             | 15,858/54                                                                                 | –                              | –                                                                | ICD–7, 8, 9 and 10<br>codes for psoriasis<br>from the Swedish<br>hospital discharge<br>register | ICD–7 codes for<br>cancer from the<br>Swedish Cancer<br>Registry           | SIR <sub>adj</sub> (CI)<br>1.18 (0.89–<br>1.27) | –                         | –                                             |
| Hemminki <sup>96</sup><br>(Ann Oncol.)<br>2012b<br>Sweden                                      | 222,027 person–<br>years/65                                                               | –                              | –                                                                | The Swedish<br>Hospital Discharge<br>Register                                                   | The Swedish Cancer<br>Registry                                             | SIR <sub>adj</sub> (CI)<br>1.23 (0.95–<br>1.56) | –                         | –                                             |
| Lan <sup>25</sup><br>2012                                                                      | 8,180/24<br>163,600/409                                                                   | 47.5 +/- 17.3<br>47.4 +/- 17.3 | 3,738/4,442<br>74,760/88,840                                     | ICD–9 codes for<br>psoriasis from The                                                           | ICD–O codes for<br>cancer from The                                         | –                                               | –                         | Matched<br>controls                           |

|                                               |                          |                        |             |                                                                                                                                                         |                                            |                                                |                      |                                                         |
|-----------------------------------------------|--------------------------|------------------------|-------------|---------------------------------------------------------------------------------------------------------------------------------------------------------|--------------------------------------------|------------------------------------------------|----------------------|---------------------------------------------------------|
| Taiwan                                        |                          |                        |             | National Health Insurance Program database                                                                                                              | National Health Insurance Program database |                                                |                      |                                                         |
| Brănișteanu <sup>31</sup><br>2015<br>Romania  | 57/1                     | –                      | –           | Diagnosed by dermatologist                                                                                                                              | Not reported                               | –                                              | TNF–alpha–inhibitors | –                                                       |
| Avina–Zubieta <sup>74</sup><br>2018<br>Canada | 81,568/157<br>81,568/194 | Mean 48.5<br>Mean 48.5 | 51.5%/49.5% | Diagnostic codes for psoriasis (1 by dermatologist, 2 by non–dermatologist or hospitalized with diagnostic code) from an administrative health database | Cancer–registry, British Columbia, Canada  | IRR <sub>adj</sub> (CI)<br>0.79<br>(0.64–0.98) | –                    | Matched controls from an administrative health database |



| table 11. Details of studies included in analysis for colorectal cancer in patients with psoriasis |                                                                                           |                            |                                                                  |                                                                                                 |                                                                                                          |                                                 |                           |                                                                                |
|----------------------------------------------------------------------------------------------------|-------------------------------------------------------------------------------------------|----------------------------|------------------------------------------------------------------|-------------------------------------------------------------------------------------------------|----------------------------------------------------------------------------------------------------------|-------------------------------------------------|---------------------------|--------------------------------------------------------------------------------|
| Reference/<br>year of publication/<br>country                                                      | Psoriasis all/<br>psoriasis with<br>cancer/<br>reference all/<br>reference with<br>cancer | Age<br>Psoriasis/reference | Sex<br>Psoriasis<br>females/males/<br>reference<br>females/males | Assessment of<br>psoriasis                                                                      | Assessment of<br>cancer                                                                                  | Results                                         | Treatment<br>investigated | Characteristics<br>of reference<br>population                                  |
| Stern <sup>95</sup><br>1988<br>USA                                                                 | 1,380/21                                                                                  | 50 +/- 14                  | 368/588                                                          | Hospital diagnosed<br>psoriasis                                                                 | Patient interviews,<br>medical records and<br>interviews of next<br>of kin                               | –                                               | PUVA                      | –                                                                              |
| Lindelof <sup>43</sup><br>1990<br>Sweden                                                           | 20,328/43                                                                                 | Mean 48                    | 11,292/9,036<br>female                                           | The Swedish<br>psoriasis<br>association's<br>membership<br>registry                             | The Swedish<br>National Cancer<br>Registry                                                               | SIR <sub>adj</sub> (CI)<br>0.76 (0.6–<br>1.1)   | –                         | –                                                                              |
| Frentz <sup>11</sup> (BJD 141)<br>1999a<br>Denmark                                                 | 6,905/84                                                                                  | –                          | 3,487/3,418                                                      | ICD–8: 696 from the<br>Danish National<br>hospital discharge<br>register                        | ICD–O from The<br>National Danish<br>cancer registry                                                     | –                                               | –                         | –                                                                              |
| Hannuksela–<br>Svahn <sup>45</sup> (BJD)<br>1999b<br>Sweden and Finland                            | 944/6                                                                                     | Mean 43–44                 | 363/581                                                          | Hospital diagnosed<br>psoriasis                                                                 | The National<br>Swedish and Finnish<br>Cancer Registries                                                 | –                                               | Trioxalen bath<br>PUVA    | –                                                                              |
| Brauchli <sup>48</sup><br>2009<br>UK                                                               | 33,760/79<br>34,001/55                                                                    |                            | 53.1%/46.9%<br>53.2%/46.8%                                       | A diagnosis of<br>psoriasis in the UK<br>General Practice<br>Research Database                  | A cancer diagnosis<br>in the UK General<br>Practice Research<br>Database and<br>appropriate<br>treatment | IRR <sub>adj</sub> (CI)<br>1.35 (0.97–<br>1.90) | –                         | Matched<br>controls from<br>the UK General<br>Practice<br>Research<br>Database |
| Ji <sup>49</sup><br>2009<br>Sweden                                                                 | 15,858/136                                                                                | –                          | –                                                                | ICD–7, 8, 9 and 10<br>codes for psoriasis<br>from the Swedish<br>hospital discharge<br>register | ICD–7 codes for<br>cancer from the<br>Swedish Cancer<br>Registry                                         | –                                               | –                         | –                                                                              |

|                                                           |                          |                                |                              |                                                                                                                  |                                                                                                |                                            |                    |                                                         |
|-----------------------------------------------------------|--------------------------|--------------------------------|------------------------------|------------------------------------------------------------------------------------------------------------------|------------------------------------------------------------------------------------------------|--------------------------------------------|--------------------|---------------------------------------------------------|
| Chen <sup>93</sup><br>2011<br>Taiwan                      | 3,686/15                 | 44.00 +/- 19.62                | 1,445/2,241                  | ICD–codes from the Longitudinal Health Insurance Database                                                        | “Cancer catastrophic illness certificate”, which requires cytological or pathological evidence | HR <sub>adj</sub> (CI)<br>1.70 (1.01–2.86) | –                  | –                                                       |
| Hemminki <sup>96</sup><br>(Ann Oncol.)<br>2012b<br>Sweden | 222,027 person–years/172 | –                              | –                            | The Swedish Hospital Discharge Register                                                                          | The Swedish Cancer Registry                                                                    | –                                          | –                  | –                                                       |
| Lan <sup>25</sup><br>2012<br>Taiwan                       | 8,180/85<br>163,600/930  | 47.5 +/- 17.3<br>47.4 +/- 17.3 | 3,738/4,442<br>74,760/88,840 | ICD–9 codes for psoriasis from The National Health Insurance Program database                                    | ICD–O codes for cancer from The National Health Insurance Program database                     | –                                          | –                  | Matched controls                                        |
| Li <sup>53</sup><br>2016<br>USA                           | 1,120/20<br>63,770/697   | 61.0 +/- 6.8<br>60.8 +/- 6.8   | 1,220<br>63,770              | Self–reported psoriasis, confirmed using the Psoriasis Screening Tool questionnaire                              | Not reported                                                                                   | HR <sub>adj</sub> (CI)<br>1.11 (0.71–1.73) | –                  | Participants in the Nurses’ Health Study                |
| Fiorentino <sup>54</sup><br>2017<br>International         | 12,092/14                | 48 +/- 13.91                   | 5,456/6,636                  | Dermatologist                                                                                                    | Cancers were reported by treating dermatologist                                                | –                                          | Systemic treatment | –                                                       |
| Magnano <sup>55</sup><br>2017<br>Italy                    | 359/2                    | Mean 60                        |                              | Review of clinical records                                                                                       | Not reported                                                                                   | –                                          | –                  | –                                                       |
| Avina–Zubieta <sup>74</sup><br>2018<br>Canada             | 81,568/443<br>81,568/526 | Mean 48.5<br>Mean 48.5         | 51.5%/49.5%<br>51.5%/49.5%   | Diagnostic codes for psoriasis (1 by dermatologist, 2 by non–dermatologist or hospitalized with diagnostic code) | Cancer–registry, British Columbia, Canada                                                      | –                                          | –                  | Matched controls from an administrative health database |

|                                    |                                   |                                 |                 |                                                                                                                           |                                                                                     |                                            |   |                                                         |
|------------------------------------|-----------------------------------|---------------------------------|-----------------|---------------------------------------------------------------------------------------------------------------------------|-------------------------------------------------------------------------------------|--------------------------------------------|---|---------------------------------------------------------|
|                                    |                                   |                                 |                 | from an administrative health database                                                                                    |                                                                                     |                                            |   |                                                         |
| Lee <sup>41</sup><br>2018<br>Korea | 892,089/3,987<br>4,460,445/20,437 | 48.3 +/- 16.57<br>4.3 +/- 16.57 | 430,917/461,172 | At least two hospital/clinic visits with an ICD-10 code for psoriasis from the National Health Insurance Service database | ICD-10 codes (C00-C96) for cancer in the National Health Insurance Service database | HR <sub>adj</sub> (CI)<br>0.96 (0.93-0.99) | - | Matched controls from National Health Insurance Service |

| table 1m. Details of studies included in analysis for bladder cancer in patients with psoriasis |                                                                                           |                            |                                                                  |                                                                          |                                                                 |                                               |                           |                                               |
|-------------------------------------------------------------------------------------------------|-------------------------------------------------------------------------------------------|----------------------------|------------------------------------------------------------------|--------------------------------------------------------------------------|-----------------------------------------------------------------|-----------------------------------------------|---------------------------|-----------------------------------------------|
| Reference/<br>year of publication/<br>country                                                   | Psoriasis all/<br>psoriasis with<br>cancer/<br>reference all/<br>reference with<br>cancer | Age<br>Psoriasis/reference | Sex<br>Psoriasis<br>females/males/<br>reference<br>females/males | Assessment of<br>psoriasis                                               | Assessment of<br>cancer                                         | Results                                       | Treatment<br>investigated | Characteristics<br>of reference<br>population |
| Bailin <sup>1</sup><br>1975<br>USA                                                              | 205/1                                                                                     | –                          | –                                                                | Hospital diagnosed<br>psoriasis                                          | Not reported                                                    | –                                             | Methotrexate              | –                                             |
| Pittelkow <sup>2</sup><br>1981<br>UK                                                            | 260/1                                                                                     | –                          | –                                                                | Records from<br>patients<br>hospitalized for<br>psoriasis                | Skin cancer: biopsy<br>Other cancers: Self-<br>reported         | –                                             | Coal tar                  | –                                             |
| Alderson <sup>4</sup><br>1983<br>Scotland                                                       | 8,405/22                                                                                  | –                          | –                                                                | Discharge records<br>with a psoriasis<br>diagnosis                       | ICD–O from the<br>Scottish National<br>cancer registry          | SIR (p–value)<br>1.12 (<0.75)                 | –                         | –                                             |
| Jones <sup>6</sup><br>1985<br>UK                                                                | 719/2                                                                                     | Not reported               | 414/305                                                          | Not reported                                                             | Data sources from<br>the West of<br>Scotland cancer<br>registry | –                                             | Tar                       | –                                             |
| Frentz <sup>11</sup> (BJD 141)<br>1999a<br>Denmark                                              | 6,905/34                                                                                  | –                          | 3,487/3,418                                                      | ICD–8: 696 from the<br>Danish National<br>hospital discharge<br>register | ICD–O from The<br>National Danish<br>cancer registry            | SIR <sub>adj</sub> (CI)<br>1.0 (0.7–1.4)      | –                         | –                                             |
| Frentz <sup>12</sup> (BJD 140)<br>1999b<br>Denmark                                              | 1,738/2                                                                                   | Mean 43                    | 866/872                                                          | Hospital diagnosed<br>psoriasis                                          | ICD–O from The<br>National Danish<br>cancer registry            | SIR <sub>adj</sub> (CI)<br>0.67 (0.1–<br>2.3) | Climatotherapy            | –                                             |
| Hannuksela–<br>Svahn <sup>45</sup> (BJD)<br>1999b<br>Sweden and Finland                         | 944/3                                                                                     | Mean 43–44                 | 363/581                                                          | Hospital diagnosed<br>psoriasis                                          | The National<br>Swedish and Finnish<br>Cancer Registries        | SIR (CI)<br>1.1 (0.2–3.2)                     | Trioxalen bath<br>PUVA    | –                                             |
| Hannuksela–<br>Svahn <sup>14</sup><br>2000                                                      | 5,687/25                                                                                  | –                          | 2,555/3,132                                                      | The national<br>discharge register<br>linked with the                    | Patients were<br>linked to the Finnish<br>National cancer       | Sir <sub>adj</sub> (CI)<br>1.4 (0.9–2.1)      | –                         | –                                             |

|                                                    |                       |                              |                 |                                                                                    |                                                                                                 |                                             |                                               |                                          |
|----------------------------------------------------|-----------------------|------------------------------|-----------------|------------------------------------------------------------------------------------|-------------------------------------------------------------------------------------------------|---------------------------------------------|-----------------------------------------------|------------------------------------------|
| Finland                                            |                       |                              |                 | Population Central register                                                        | registry via personal identification numbers                                                    |                                             |                                               |                                          |
| Roelofzen <sup>86</sup><br>2009<br>The Netherlands | 4,315/25<br>8,885/33  | Mean 31,1                    | 48%/52%         | Hospital diagnosed psoriasis                                                       | Medical files and questionnaires supplemented by record linkage to the National Cancer Registry | HR <sub>adj</sub> (CI)<br>0.51 (0.14–1.92)  | Coal tar                                      | Patients with hospital diagnosed eczema  |
| Chen <sup>93</sup><br>2011<br>Taiwan               | 3,686/8               | 44.00 +/- 19.62              | 1,445/2,241     | ICD–codes from the Longitudinal Health Insurance Database                          | “Cancer catastrophic illness certificate”, which requires cytological or pathological evidence  | HR <sub>adj</sub> (CI)<br>3.18 (1.54–6.57)  | –                                             | –                                        |
| Laws <sup>91</sup><br>2011<br>UK/Ireland           | 129/1                 | 46.0 +/- 11.4                | 60/69           | Diagnosed at a clinical center                                                     | Not reported                                                                                    | –                                           | Ustekinumab                                   | –                                        |
| Liu <sup>97</sup><br>Sweden<br>2012                | 19,777/110            | –                            | –               | ICD–codes for psoriasis from the Swedish hospital discharge register               | ICD–O codes for cancer from the Swedish Cancer Registry                                         | SIR <sub>adj</sub> (CI)<br>1.28 (1.06–1.55) | –                                             | –                                        |
| Staumont–Salle <sup>27</sup><br>2012<br>France     | 306/1                 | Mean 47                      | 104/202         | Hospital diagnosed psoriasis                                                       | Not reported                                                                                    | –                                           | Biologic– and non–biologic systemic treatment | –                                        |
| Esposito <sup>36</sup><br>2016<br>Italy            | 350/1                 | 48.4 +/- 13.1                | 42%/68 %        | Hospital diagnosed psoriasis                                                       | Not reported                                                                                    | –                                           | Biologics                                     | –                                        |
| LI <sup>53</sup><br>2016<br>USA                    | 1,120/7<br>63,770/232 | 61.0 +/- 6.8<br>60.8 +/- 6.8 | 1,220<br>63,770 | Self–reported psoriasis confirmed using the Psoriasis Screening Tool questionnaire | Not reported                                                                                    | HR <sub>adj</sub> (CI)<br>1.10 (0.52–2.35)  | –                                             | Participants in the Nurses’ Health Study |

|                                                   |                                |                                 |                 |                                                                                                                           |                                                                                     |                                            |                    |                                                         |
|---------------------------------------------------|--------------------------------|---------------------------------|-----------------|---------------------------------------------------------------------------------------------------------------------------|-------------------------------------------------------------------------------------|--------------------------------------------|--------------------|---------------------------------------------------------|
| Fiorentino <sup>54</sup><br>2017<br>International | 12,092/8                       | 48 +/- 13.91                    | 5,456/6,636     | Dermatologist                                                                                                             | Cancers were reported by treating dermatologist                                     | –                                          | Systemic treatment | –                                                       |
| Napolitano <sup>56</sup><br>2017<br>Italy         | 915/1                          | Mean 58.7                       | 420/495         | Dermatologist                                                                                                             | Not reported                                                                        | –                                          | Systemic treatment | –                                                       |
| Lee <sup>41</sup><br>2018<br>Korea                | 892,089/762<br>4,460,445/3,538 | 48.3 +/- 16.57<br>4.3 +/- 16.57 | 430,917/461,172 | At least two hospital/clinic visits with an ICD–10 code for psoriasis from the National Health Insurance Service database | ICD–10 codes (C00–C96) for cancer in the National Health Insurance Service database | HR <sub>adj</sub> (CI)<br>1.05 (0.97–1.13) | –                  | Matched controls from National Health Insurance Service |

| <b>table 1n.</b> Details of studies included in analysis for cancer overall for patients with psoriasis treated with biologics |                                                                                           |                            |                                                                  |                                                |                                                                      |         |                           |                                                                    |
|--------------------------------------------------------------------------------------------------------------------------------|-------------------------------------------------------------------------------------------|----------------------------|------------------------------------------------------------------|------------------------------------------------|----------------------------------------------------------------------|---------|---------------------------|--------------------------------------------------------------------|
| Reference/<br>year of publication/<br>country                                                                                  | Psoriasis all/<br>psoriasis with<br>cancer/<br>reference all/<br>reference with<br>cancer | Age<br>Psoriasis/reference | Sex<br>Psoriasis<br>females/males/<br>reference<br>females/males | Assessment of<br>psoriasis                     | Assessment of<br>cancer                                              | Results | Treatment<br>investigated | Characteristics<br>of reference<br>population                      |
| Ahmad <sup>20</sup><br>2006<br>Ireland                                                                                         | 49/2                                                                                      | Mean 51.6                  | 17/32                                                            | Treated for<br>psoriasis by a<br>dermatologist | Not reported                                                         | –       | Etanercept                | Patients with<br>psoriasis<br>receiving<br>conventional<br>therapy |
| Antoniou <sup>21</sup><br>2010<br>Greece                                                                                       | 118/3                                                                                     | 49 (19–80)                 | 36/82                                                            | Hospital diagnosed<br>psoriasis                | Not reported                                                         | –       | Etanercept                | Patients with<br>psoriasis<br>receiving<br>conventional<br>therapy |
| Brunasso <sup>22</sup><br>2011<br>Italy                                                                                        | 103/6                                                                                     | –                          | –                                                                | Review of case files                           | Not reported                                                         | –       | Biologics                 | Patients with<br>psoriasis<br>receiving<br>conventional<br>therapy |
| van Lümig <sup>23</sup><br>2011<br>The Netherlands                                                                             | 173/9                                                                                     | 50.6 +/- 12.1              | 64/109                                                           | Hospital diagnosed<br>psoriasis                | Not reported                                                         | –       | Biologics                 | Patients with<br>psoriasis<br>receiving<br>conventional<br>therapy |
| Puig <sup>26</sup><br>2012<br>Spain                                                                                            | 444/6                                                                                     | 46.48 +/- 13.6             | 45.5%/65.5%                                                      | Hospital diagnosed<br>psoriasis                | Physical<br>examination and<br>laboratory test<br>every three months | –       | Etanercept                | Patients with<br>psoriasis<br>receiving<br>conventional<br>therapy |
| Staumont–Salle <sup>27</sup><br>2012<br>Frankrig                                                                               | 266/9                                                                                     | Mean 47                    | 104/202                                                          | Hospital diagnosed<br>psoriasis                | Not reported                                                         | –       | Biologics                 | Patients with<br>psoriasis<br>receiving                            |

|                                              |                        |                 |              |                                                                                                         |                                                                                   |                              |                      |                                                        |
|----------------------------------------------|------------------------|-----------------|--------------|---------------------------------------------------------------------------------------------------------|-----------------------------------------------------------------------------------|------------------------------|----------------------|--------------------------------------------------------|
|                                              |                        |                 |              |                                                                                                         |                                                                                   |                              |                      | conventional therapy                                   |
| Conti <sup>28</sup><br>2013<br>Italy         | 45/2                   | 58.29 +/- 13.12 | 14/31        | Hospital diagnosed psoriasis                                                                            | Not reported                                                                      | –                            | Etanercept           | Patients with psoriasis receiving conventional therapy |
| Kimball <sup>30</sup><br>2014<br>USA         | 2,510/122              | 46.3 +/- 13.6   | 1,194 /1,317 | Patients eligible for etanercept for their psoriasis                                                    | Not reported                                                                      | –                            | Etanercept           | Patients with psoriasis receiving conventional therapy |
| Brănișteanu <sup>31</sup><br>2015<br>Romania | 57/2                   | –               | –            | Diagnosed by dermatologist                                                                              | Not reported                                                                      | –                            | TNF–alpha–inhibitors | Patients with psoriasis receiving conventional therapy |
| Spehr <sup>34</sup><br>2015<br>Germany       | –                      | Mean 47         | 40.5% female | Eligible for inclusion in Psobest registry                                                              | Not reported                                                                      | IR/PY<br>0.86/100<br>0.7/100 | Biologics            | Patients with psoriasis receiving conventional therapy |
| Asgari <sup>35</sup><br>2016<br>USA          | 2,285/184<br>3,604/505 | 51.00 +/- 15    | 2,914/2,975  | ICD–9 code 696.1 and systemic psoriasis treatment in the Kaiser Permanente Northern California database | ICD–O codes for cancer from Kaiser Permanente Northern California Cancer Registry | –                            | Biologics            | Patients with psoriasis receiving conventional therapy |
| Esposito <sup>36</sup><br>2016<br>Italy      | 350/4                  | 48.4 +/- 13.1   | 42%/68 %     | Hospital diagnosed psoriasis                                                                            | Not reported                                                                      | –                            | Biologics            | Patients with psoriasis receiving conventional therapy |



|                                               |                         |                |               |                                                                                                                                                                     |                                                                                                                                   |   |             |                                                                    |
|-----------------------------------------------|-------------------------|----------------|---------------|---------------------------------------------------------------------------------------------------------------------------------------------------------------------|-----------------------------------------------------------------------------------------------------------------------------------|---|-------------|--------------------------------------------------------------------|
| Vergou <sup>38</sup><br>2016<br>Greece        | 93/3                    | Mean 48.7      | 43/50         | Hospital diagnosed<br>psoriasis                                                                                                                                     | Not reported                                                                                                                      | – | Ustekisumab | Patients with<br>psoriasis<br>receiving<br>conventional<br>therapy |
| Menter <sup>39</sup><br>2017<br>International | 6,051/247               | 47.0 +/- 18–94 | 2,566/3,493   | Dermatologist                                                                                                                                                       | Not reported                                                                                                                      | – | Adalimumab  | Patients with<br>psoriasis<br>receiving<br>conventional<br>therapy |
| Wu <sup>42</sup><br>2018<br>USA               | 9,878/225<br>32,794/734 | –              | 22,154/20,640 | 2 ICD–codes for<br>psoriasis, one by a<br>dermatologist, from<br>the<br>Truven Health<br>Analytics<br>MarketScan<br>Commercial Claims<br>and Encounters<br>Database | ICD–O codes for<br>cancer from the<br>Truven Health<br>Analytics<br>MarketScan<br>Commercial Claims<br>and Encounters<br>Database | – | Biologics   | Patients with<br>psoriasis<br>receiving<br>conventional<br>therapy |

| table 1o. Details of studies included in analysis for cancer excluding keratinocyte cancer for patients with psoriasis treated with biologics |                                                                                           |                            |                                                                  |                                                                                |                                                                      |                                                 |                           |                                                                    |
|-----------------------------------------------------------------------------------------------------------------------------------------------|-------------------------------------------------------------------------------------------|----------------------------|------------------------------------------------------------------|--------------------------------------------------------------------------------|----------------------------------------------------------------------|-------------------------------------------------|---------------------------|--------------------------------------------------------------------|
| Reference/<br>year of publication/<br>country                                                                                                 | Psoriasis all/<br>psoriasis with<br>cancer/<br>reference all/<br>reference with<br>cancer | Age<br>Psoriasis/reference | Sex<br>Psoriasis<br>females/males/<br>reference<br>females/males | Assessment of<br>psoriasis                                                     | Assessment of<br>cancer                                              | Results                                         | Treatment<br>investigated | Characteristics<br>of reference<br>population                      |
| Antoniou <sup>21</sup><br>2010<br>Greece                                                                                                      | 118/3                                                                                     | 49 (19–80)                 | 36/82                                                            | Hospital diagnosed<br>psoriasis                                                | Not reported                                                         | –                                               | Etanercept                | Patients with<br>psoriasis<br>receiving<br>conventional<br>therapy |
| Brunasso <sup>22</sup><br>2011<br>Italy                                                                                                       | 103/5                                                                                     | –                          | –                                                                | Review of case files                                                           | Not reported                                                         | –                                               | Biologics                 | Patients with<br>psoriasis<br>receiving<br>conventional<br>therapy |
| Puig <sup>26</sup><br>2012<br>Spain                                                                                                           | 444/4                                                                                     | 46.48 +/- 13.6             | 45.5%/65.5%                                                      | Patients treated for<br>psoriasis in on of 59<br>dermatology units<br>in Spain | Physical<br>examination and<br>laboratory test<br>every three months | –                                               | Etanercept                | Patients with<br>psoriasis<br>receiving<br>conventional<br>therapy |
| Staumont–Salle <sup>27</sup><br>2012<br>France                                                                                                | 266/8                                                                                     | Mean 47                    | 104/202                                                          | Hospital diagnosed<br>psoriasis                                                | Not reported                                                         | –                                               | Biologics                 | Patients with<br>psoriasis<br>receiving<br>conventional<br>therapy |
| Conti <sup>28</sup><br>2013<br>Italy                                                                                                          | 45/2                                                                                      | 58.29 +/- 13.12            | 14/31                                                            | Hospital diagnosed<br>psoriasis                                                | Not reported                                                         | –                                               | Etanercept                | Patients with<br>psoriasis<br>receiving<br>conventional<br>therapy |
| Kimball <sup>30</sup><br>2014<br>USA                                                                                                          | 2,510/60                                                                                  | 46.3 +/- 13.6              | 1,194 /1,317                                                     | Patients eligible for<br>etanercept for their<br>psoriasis                     | Not reported                                                         | SIR <sub>adj</sub> (CI)<br>0.78 (0.59–<br>1.00) | Etanercept                | Patients<br>receiving<br>nonbiologic                               |

|                                               |                        |              |             |                                                                                                         |                                                                                                            |                                            |             |                                                                                          |
|-----------------------------------------------|------------------------|--------------|-------------|---------------------------------------------------------------------------------------------------------|------------------------------------------------------------------------------------------------------------|--------------------------------------------|-------------|------------------------------------------------------------------------------------------|
|                                               |                        |              |             |                                                                                                         |                                                                                                            |                                            |             | systemic therapies from the MarketScan database                                          |
| Menter <sup>52</sup><br>2015<br>International | 6,059/166              | 47.0 (18–94) | 2,566/3,493 | Dermatologist                                                                                           | Not reported                                                                                               | –                                          | Adalimumab  | Patients with psoriasis receiving conventional therapy                                   |
| Papp <sup>98</sup><br>2015<br>International   | 10,009/267<br>2,084/57 | –            | 4391/5618   | Dermatologist                                                                                           | Assessed by the study physician following review of patient data (including histopathology when available) | –                                          | Biologics   | Patients with psoriasis receiving non-biologic systemic treatment in the PSOLAR registry |
| Asgari <sup>35</sup><br>2016<br>USA           | 2,285/75<br>3,604/254  | 51.00 +/- 15 | 2,914/2,975 | ICD–9 code 696.1 and systemic psoriasis treatment in the Kaiser Permanente Northern California database | ICD–O codes for cancer from Kaiser Permanente Northern California Cancer Registry                          | HR <sub>adj</sub> (CI)<br>0.86 (0.66–1.13) | Biologics   | Patients with psoriasis receiving conventional therapy                                   |
| Vergou <sup>38</sup><br>2016<br>Greece        | 93/1                   | Mean 48.7    | 43/50       | Hospital diagnosed psoriasis                                                                            | Not reported                                                                                               | –                                          | Ustekisumab | Patients with psoriasis receiving conventional therapy                                   |
| Magnano <sup>55</sup><br>2017<br>Italy        | 214/6<br>145/3         | Mean 60      |             | Review of clinical records                                                                              | Not reported                                                                                               | –                                          | Biologics   | Patients with psoriasis receiving conventional therapy                                   |

|                                           |                         |           |               |                                                                                                                                          |                                                                                                              |   |           |                                                        |
|-------------------------------------------|-------------------------|-----------|---------------|------------------------------------------------------------------------------------------------------------------------------------------|--------------------------------------------------------------------------------------------------------------|---|-----------|--------------------------------------------------------|
| Napolitano <sup>56</sup><br>2017<br>Italy | 534/4<br>381/4          | Mean 58.7 | 420/495       | Dermatologist                                                                                                                            | Not reported                                                                                                 | – | Biologics | Patients with psoriasis receiving conventional therapy |
| Wu <sup>42</sup><br>2018<br>USA           | 9,878/103<br>32,916/341 | –         | 22,154/20,640 | 2 ICD–codes for psoriasis, one by a dermatologist, from the Truven Health Analytics MarketScan Commercial Claims and Encounters Database | ICD–O codes for cancer from the Truven Health Analytics MarketScan Commercial Claims and Encounters Database | – | Biologics | Patients with psoriasis receiving conventional therapy |

| table 1p. Details of studies included in analysis for keratinocyte cancer for patients with psoriasis treated with biologics |                                                                                           |                            |                                                                  |                                                            |                                                                      |                                                 |                                            |                                                                    |
|------------------------------------------------------------------------------------------------------------------------------|-------------------------------------------------------------------------------------------|----------------------------|------------------------------------------------------------------|------------------------------------------------------------|----------------------------------------------------------------------|-------------------------------------------------|--------------------------------------------|--------------------------------------------------------------------|
| Reference/<br>year of publication/<br>country                                                                                | Psoriasis all/<br>psoriasis with<br>cancer/<br>reference all/<br>reference with<br>cancer | Age<br>Psoriasis/reference | Sex<br>Psoriasis<br>females/males/<br>reference<br>females/males | Assessment of<br>psoriasis                                 | Assessment of<br>cancer                                              | Results                                         | Treatment<br>investigated                  | Characteristics<br>of reference<br>population                      |
| Ahmad <sup>20</sup><br>2006<br>Ireland                                                                                       | 49/2                                                                                      | Mean 51.6                  | 17/32                                                            | Treated for<br>psoriasis by a<br>dermatologist             | Not reported                                                         | –                                               | Etanercept                                 | Patients with<br>psoriasis<br>receiving<br>conventional<br>therapy |
| Warren <sup>65</sup><br>2008<br>UK                                                                                           | 102/1                                                                                     | 45 +/- 19                  | 59/43                                                            | Hospital diagnosed<br>psoriasis                            | Physical<br>examination                                              |                                                 | Biologics                                  | Patients with<br>psoriasis<br>receiving<br>conventional<br>therapy |
| Brunasso <sup>22</sup><br>2011<br>Italy                                                                                      | 103/1                                                                                     | –                          | –                                                                | Review of case files                                       | Not reported                                                         | –                                               | Biologics                                  | Patients with<br>psoriasis<br>receiving<br>conventional<br>therapy |
| Puig <sup>26</sup><br>2012<br>Spain                                                                                          | 444/2                                                                                     | 46.48 +/- 13.6             | 45.5%/65.5%                                                      | Hospital diagnosed<br>psoriasis                            | Physical<br>examination and<br>laboratory test<br>every three months | –                                               | Etanercept                                 | Patients with<br>psoriasis<br>receiving<br>conventional<br>therapy |
| Staumont–Salle <sup>27</sup><br>2012<br>Frankrig                                                                             | 266/1                                                                                     | Mean 47                    | 104/202                                                          | Hospital diagnosed<br>psoriasis                            | Not reported                                                         | –                                               | Biologic– and<br>non–biologic<br>Biologics | Patients with<br>psoriasis<br>receiving<br>conventional<br>therapy |
| Kimball <sup>30</sup><br>2014<br>USA                                                                                         | 2,510/66                                                                                  | 46.3 +/- 13.6              | 1,194 /1,317                                                     | Patients eligible for<br>etanercept for their<br>psoriasis | Not reported                                                         | SIR <sub>adj</sub> (CI)<br>0.54 (0.42–<br>0.69) | Etanercept                                 | Patients<br>receiving<br>nonbiologic                               |

|                                                    |                        |               |             |                                                                                                                           |                                                                                   |                                            |                      |                                                        |
|----------------------------------------------------|------------------------|---------------|-------------|---------------------------------------------------------------------------------------------------------------------------|-----------------------------------------------------------------------------------|--------------------------------------------|----------------------|--------------------------------------------------------|
|                                                    |                        |               |             |                                                                                                                           |                                                                                   |                                            |                      | systemic therapies from the MarketScan database        |
| Egeberg <sup>99</sup><br>2015<br>Denmark           | 3,225/37               | 46.5 +/- 15.5 | 1,217/2,008 | The DERMBIO registry contains data on all Danish patients with moderate-to-severe plaque psoriasis treated with biologics | Not reported                                                                      |                                            | Biologics            | Patients with psoriasis receiving conventional therapy |
| van Lümig <sup>68</sup><br>2015<br>The Netherlands | 280/11                 | 46.8 +/- 11.9 | 99/181      | Dermatologist                                                                                                             | Cytopathology                                                                     | –                                          | TNF-alpha inhibitors | Patients with psoriasis receiving conventional therapy |
| Menter <sup>52</sup><br>2015<br>International      | 6,059/112              | 47.0 (18–94)  | 2,566/3,493 | Dermatologist                                                                                                             | Not reported                                                                      | –                                          | Adalimumab           | Patients with psoriasis receiving conventional therapy |
| Asgari <sup>35</sup><br>2016<br>USA                | 2,285/109<br>3,604/280 | 51.00 +/- 15  | 2,914/2,975 | ICD–9 code 696.1 and systemic psoriasis treatment in the Kaiser Permanente Northern California database                   | ICD–O codes for cancer from Kaiser Permanente Northern California Cancer Registry | HR <sub>adj</sub> (CI)<br>1.42 (1.12–1.80) | Biologics            | Patients with psoriasis receiving conventional therapy |
| Vergou <sup>38</sup><br>2016<br>Greece             | 93/2                   | Mean 48.7     | 43/50       | Hospital diagnosed psoriasis                                                                                              | Not reported                                                                      | –                                          | Ustekisumab          | Patients with psoriasis receiving conventional therapy |

|                                   |                      |   |               |                                                                                                                                          |                                                                                                              |   |           |                                                        |
|-----------------------------------|----------------------|---|---------------|------------------------------------------------------------------------------------------------------------------------------------------|--------------------------------------------------------------------------------------------------------------|---|-----------|--------------------------------------------------------|
| Mason <sup>76</sup><br>2018<br>UK | 5,672/74<br>3,188/22 | – | –             | Included in BADBIR                                                                                                                       | Not reported                                                                                                 | – | Biologics | Patients with psoriasis receiving conventional therapy |
| Wu <sup>42</sup><br>2018<br>USA   | 9,878/122            | – | 22,154/20,640 | 2 ICD–codes for psoriasis, one by a dermatologist, from the Truven Health Analytics MarketScan Commercial Claims and Encounters Database | ICD–O codes for cancer from the Truven Health Analytics MarketScan Commercial Claims and Encounters Database | – | Biologics | Patients with psoriasis receiving conventional therapy |

| <b>table 1q.</b> Details of studies included in analysis for lymphoma overall for patients with psoriasis treated with biologics |                                                                                           |                            |                                                                  |                                                            |                                                                      |                                                 |                           |                                                                                                     |
|----------------------------------------------------------------------------------------------------------------------------------|-------------------------------------------------------------------------------------------|----------------------------|------------------------------------------------------------------|------------------------------------------------------------|----------------------------------------------------------------------|-------------------------------------------------|---------------------------|-----------------------------------------------------------------------------------------------------|
| Reference/<br>year of publication/<br>country                                                                                    | Psoriasis all/<br>psoriasis with<br>cancer/<br>reference all/<br>reference with<br>cancer | Age<br>Psoriasis/reference | Sex<br>Psoriasis<br>females/males/<br>reference<br>females/males | Assessment of<br>psoriasis                                 | Assessment of<br>cancer                                              | Results                                         | Treatment<br>investigated | Characteristics<br>of reference<br>population                                                       |
| Puig <sup>26</sup><br>2012<br>Spain                                                                                              | 444/1                                                                                     | 46.48 +/- 13.6             | 45.5%/65.5%                                                      | Hospital diagnosed<br>psoriasis                            | Physical<br>examination and<br>laboratory test<br>every three months | –                                               | Etanercept                | Patients with<br>psoriasis<br>receiving<br>conventional<br>therapy                                  |
| Staumont–Salle <sup>27</sup><br>2012<br>Frankrig                                                                                 | 266/1                                                                                     | Mean 47                    | 104/202                                                          | Hospital diagnosed<br>psoriasis                            | Not reported                                                         | –                                               | Biologics                 | Patients with<br>psoriasis<br>receiving<br>conventional<br>therapy                                  |
| Conti <sup>28</sup><br>2013<br>Italy                                                                                             | 45/1                                                                                      | 58.29 +/- 13.12            | 14/31                                                            | Hospital diagnosed<br>psoriasis                            | Not reported                                                         | –                                               | Etanercept                | Patients with<br>psoriasis<br>receiving<br>conventional<br>therapy                                  |
| Kimball <sup>30</sup><br>2014<br>USA                                                                                             | 2,510/2                                                                                   | 46.3 +/- 13.6              | 1,194 /1,317                                                     | Patients eligible for<br>etanercept for their<br>psoriasis | Not reported                                                         | SIR <sub>adj</sub> (CI)<br>0.26 (0.03–<br>0.95) | Etanercept                | Patients<br>receiving<br>nonbiologic<br>systemic<br>therapies from<br>the<br>MarketScan<br>database |
| Menter <sup>52</sup><br>2015<br>International                                                                                    | 6,059/2                                                                                   | 47.0 (18–94)               | 2,566/3,493                                                      | Dermatologist                                              | Not reported                                                         | –                                               | Adalimumab                | Patients with<br>psoriasis<br>receiving<br>conventional<br>therapy                                  |



|                                        |                       |              |               |                                                                                                                                          |                                                                                                              |                                            |           |                                                        |
|----------------------------------------|-----------------------|--------------|---------------|------------------------------------------------------------------------------------------------------------------------------------------|--------------------------------------------------------------------------------------------------------------|--------------------------------------------|-----------|--------------------------------------------------------|
| Asgari <sup>35</sup><br>2016<br>USA    | 2,285/6<br>3,604/15   | 51.00 +/- 15 | 2,914/2,975   | ICD-9 code 696.1 and systemic psoriasis treatment in the Kaiser Permanente Northern California database                                  | ICD-O codes for cancer from Kaiser Permanente Northern California Cancer Registry                            | HR <sub>adj</sub> (CI)<br>1.01 (0.38–2.70) | Biologics | Patients with psoriasis receiving conventional therapy |
| Magnano <sup>55</sup><br>2017<br>Italy | 214/1                 | Mean 60      |               | Review of clinical records                                                                                                               | Not reported                                                                                                 | –                                          | Biologics | Patients with psoriasis receiving conventional therapy |
| Wu <sup>42</sup><br>2018<br>USA        | 9,878/15<br>32,916/65 | –            | 22,154/20,640 | 2 ICD-codes for psoriasis, one by a dermatologist, from the Truven Health Analytics MarketScan Commercial Claims and Encounters Database | ICD-O codes for cancer from the Truven Health Analytics MarketScan Commercial Claims and Encounters Database | –                                          | Biologics | Patients with psoriasis receiving conventional therapy |

| table 1r. Details of studies included in analysis for cancer overall in patients with PsA |                                                                                                                  |                                                                              |                                                                            |                                                                                                          |                                                                   |                                                 |                           |                                                                        |
|-------------------------------------------------------------------------------------------|------------------------------------------------------------------------------------------------------------------|------------------------------------------------------------------------------|----------------------------------------------------------------------------|----------------------------------------------------------------------------------------------------------|-------------------------------------------------------------------|-------------------------------------------------|---------------------------|------------------------------------------------------------------------|
| Reference/<br>year of publication/<br>country                                             | Psoriatic arthritis<br>all/<br>Psoriatic arthritis<br>with cancer/<br>reference all/<br>reference with<br>cancer | Age<br>Psoriatic arthritis<br>/reference<br>Median (range) or<br>mean +/- SD | Sex<br>Psoriatic arthritis<br>females/males/<br>reference<br>females/males | Assessment of<br>Psoriatic arthritis                                                                     | Assessment of<br>cancer                                           | Results                                         | Treatment<br>investigated | Characteristics<br>of reference<br>population                          |
| Rohekar <sup>100</sup><br>2008<br>Canada                                                  | 665/68                                                                                                           | –                                                                            | 38/30                                                                      | Diagnosed by<br>rheumatologist and<br>included in the<br>Toronto PsA Cohort                              | Pathology,<br>laboratory, or<br>radiography reports               | SIR <sub>adj</sub> (CI)<br>0.98 (0.77–<br>1.24) | –                         | –                                                                      |
| Wade <sup>101</sup><br>2013<br>USA                                                        | 3,874/604                                                                                                        | –                                                                            | 53.5%/46.7%                                                                | 2 claims with an<br>ICD–9 code 696.0<br>from the<br>MarketScan<br>database                               | Not reported                                                      | –                                               | –                         | –                                                                      |
| Gross <sup>102</sup><br>2014<br>USA                                                       | 4,216/40<br>26,133/307                                                                                           | 51.1 +/- 12.5<br>57.6 +/- 13.5                                               | 1,524/2,692<br>14,676/11,457                                               | Diagnosed by<br>rheumatologist and<br>included in the<br>CORRONA registry                                | Physician–reported,<br>confirmed by<br>treating<br>rheumatologist | IRR <sub>adj</sub> (CI)<br>1.17 (0.82–<br>1.69) | –                         | Patients in the<br>CORRONA<br>registry with<br>rheumatoid<br>arthritis |
| Mahboub <sup>103</sup><br>2014<br>Turkey                                                  | 29/2                                                                                                             | 44 (22–61)                                                                   | 13/16                                                                      | Not reported                                                                                             | Not reported                                                      | –                                               | –                         | –                                                                      |
| Fagerli <sup>104</sup><br>2015<br>UK                                                      | 709/34                                                                                                           | 45.7 +/- 11.2                                                                | 378/331                                                                    | Diagnosed by<br>rheumatologist and<br>included in the<br>British Society for<br>Rheumatology<br>Register | ICD–10 codes for<br>cancer in the<br>national cancer<br>registry  | SIR <sub>adj</sub> (CI)<br>0.94 (0.65–<br>1.34) | TNF–alpha–<br>inhibitors  | –                                                                      |
| Hagiwara <sup>105</sup><br>2015<br>Japan                                                  | 115/4                                                                                                            | 64.3 (24–90)                                                                 | 84/31                                                                      | Fulfilled the CASPAR<br>criteria                                                                         | Not reported                                                      | –                                               | –                         | –                                                                      |

|                                                       |                            |                                    |                              |                                                                                               |                                                                                                    |                                                                                      |                                 |                                                                                                                     |
|-------------------------------------------------------|----------------------------|------------------------------------|------------------------------|-----------------------------------------------------------------------------------------------|----------------------------------------------------------------------------------------------------|--------------------------------------------------------------------------------------|---------------------------------|---------------------------------------------------------------------------------------------------------------------|
| de Vlam <sup>106</sup><br>2015<br>Belgium             | 301/4                      | 48.3 +/- 10.8                      | 135/166                      | Physician diagnosed and included in the PROVE study                                           | –                                                                                                  | –                                                                                    | Etanercept                      | –                                                                                                                   |
| Chiricozzi <sup>107</sup><br>2016<br>Italy            | 199/3                      | 52.3 +/- 12.1                      | 98/101                       | Hospital diagnosed PsA                                                                        | Not reported                                                                                       | –                                                                                    | Adalimumab                      | –                                                                                                                   |
| Costa <sup>108</sup><br>2016<br>Italy                 | 618/44                     | 52.1 +/- 12.8                      | 377/241                      | Fulfilled the CASPAR criteria                                                                 | Laboratory–, radiography or pathology–data confirming malignancies                                 | –                                                                                    | TNF–alpha–inhibitors and DMARDs | –                                                                                                                   |
| Hagberg <sup>109*</sup><br>2016<br>UK                 | 8,493/547<br>82,601/4,961  | 47.11 +/- 14.61<br>47.76 +/- 14.35 | 4,352/4,141<br>43,373/39,228 | diagnosis codes for psoriatic arthritis in the UK Clinical Practice Research Datalink (CPRD). | Automated searches of the electronic records of all patients in the study                          | –                                                                                    | –                               | Patients from the CPRD with no psoriasis or psoriatic arthritis, matched on age, sex, and general practice attended |
| Hellgren <sup>110</sup><br>2016<br>Denmark and Sweden | 19,791/793<br>74,010/3,227 | –                                  | –                            | (ICD10=M07.0–3 and L40.5) code by a dermatologist in registers ARTIS or DANBIO                | The Danish and Swedish national cancer registers                                                   | RR <sub>adj</sub> (CI)<br>TNF–I–treated: 0.9 (0.7–1.1)<br>TNF–I–naïve: 1.0 (0.8–1.2) | TNF–alpha–inhibitors            | matched general population comparators from Sweden                                                                  |
| Wilton <sup>111</sup><br>2016<br>USA                  | 217/11<br>434/25           | 43.9 +/- 14.2<br>44.0 +/- 14.2     | 40%/60%<br>40%/60%           | Fulfilled the CASPAR criteria                                                                 | A cancer diagnosis in the Mayo Clinic Cancer Registry or from medical charts (keratinocyte cancer) | HR <sub>adj</sub> (CI)<br>1.41 (0.96–2.07)                                           | –                               | Age– and sex–matched controls                                                                                       |
| Mease <sup>112</sup><br>2018                          | 1493/–                     | –                                  | –                            | Diagnosed by rheumatologist and                                                               | Physician–reported, confirmed by                                                                   | IR/ PY<br>11.4/1,000                                                                 | –                               | –                                                                                                                   |

|                                                                                                                     |  |  |  |                                     |                            |  |  |  |
|---------------------------------------------------------------------------------------------------------------------|--|--|--|-------------------------------------|----------------------------|--|--|--|
| USA                                                                                                                 |  |  |  | included in the<br>CORRONA registry | treating<br>rheumatologist |  |  |  |
| *The study reported on all hematologic, keratinocyte cancer and solid cancers, which is interpreted as all cancers. |  |  |  |                                     |                            |  |  |  |

| table 1s. Details of studies included in analysis for cancer excluding keratinocyte cancer in patients with PsA |                                                                                                                  |                                                                              |                                                                            |                                                                                                           |                                                                                          |                                                 |                                        |                                                                                                             |
|-----------------------------------------------------------------------------------------------------------------|------------------------------------------------------------------------------------------------------------------|------------------------------------------------------------------------------|----------------------------------------------------------------------------|-----------------------------------------------------------------------------------------------------------|------------------------------------------------------------------------------------------|-------------------------------------------------|----------------------------------------|-------------------------------------------------------------------------------------------------------------|
| Reference/<br>year of publication/<br>country                                                                   | Psoriatic arthritis<br>all/<br>Psoriatic arthritis<br>with cancer/<br>reference all/<br>reference with<br>cancer | Age<br>Psoriatic arthritis<br>/reference<br>Median (range) or<br>mean +/- SD | Sex<br>Psoriatic arthritis<br>females/males/<br>reference<br>females/males | Assessment of<br>Psoriatic arthritis                                                                      | Assessment of<br>cancer                                                                  | Results                                         | Treatment<br>investigated              | Characteristics<br>of reference<br>population                                                               |
| Gross <sup>102</sup><br>2014<br>USA                                                                             | 4,216/25<br>26,133/198                                                                                           | 51.1 +/- 12.5<br>57.6 +/- 13.5                                               | 1,524/2,692<br>14,676/11,457                                               | Diagnosed by<br>rheumatologist and<br>included in the<br>CORRONA registry                                 | Physician-reported,<br>confirmed by<br>treating<br>rheumatologist                        | IRR <sub>adj</sub> (CI)<br>1.17 (0.82–<br>1.69) | –                                      | Patients in the<br>CORRONA<br>registry with<br>rheumatoid<br>arthritis                                      |
| Fagerli <sup>104</sup><br>2015<br>UK                                                                            | 709/17                                                                                                           | 45.7 +/- 11.2                                                                | 378/331                                                                    | Diagnosed by<br>rheumatologist and<br>included in the<br>British Society for<br>Rheumatology<br>Register  | ICD–10 codes for<br>cancer in the<br>national cancer<br>registry                         | SIR <sub>adj</sub> (CI)<br>0.94 (0.65–<br>1.34) | TNF–alpha–<br>inhibitors               | –                                                                                                           |
| de Vlam <sup>106</sup><br>2015<br>Belgium                                                                       | 301/4                                                                                                            | 48.3 +/- 10.8                                                                | 135/166                                                                    | Physician diagnosed<br>and included in the<br>PROVE study                                                 | –                                                                                        | –                                               | Etanercept                             | –                                                                                                           |
| Costa <sup>108</sup><br>2016<br>Italy                                                                           | 618/41                                                                                                           | 52.1 +/- 12.8                                                                | 377/241                                                                    | Fulfilled the CASPAR<br>criteria                                                                          | Laboratory–,<br>radiography or<br>pathology–data<br>confirming<br>malignancies           | –                                               | TNF–alpha–<br>inhibitors and<br>DMARDs | –                                                                                                           |
| Hagberg <sup>109*</sup><br>2016<br>UK                                                                           | 8,493/387<br>82,601/3,400                                                                                        | 47.11 +/- 14.61<br>47.76 +/- 14.35                                           | 4,352/4,141<br>43,373/39,228                                               | diagnosis codes for<br>psoriatic arthritis in<br>the UK Clinical<br>Practice Research<br>Datalink (CPRD). | Automated<br>searches of<br>the electronic<br>records of all<br>patients in the<br>study | –                                               | –                                      | Patients from<br>the CPRD with<br>no psoriasis or<br>psoriatic<br>arthritis,<br>matched on<br>age, sex, and |

|                                                                                                                              |                  |                                |                    |                               |                                                                                                    |                                            |            |                               |
|------------------------------------------------------------------------------------------------------------------------------|------------------|--------------------------------|--------------------|-------------------------------|----------------------------------------------------------------------------------------------------|--------------------------------------------|------------|-------------------------------|
|                                                                                                                              |                  |                                |                    |                               |                                                                                                    |                                            |            | general practice attended     |
| Wilton <sup>111</sup><br>2016<br>USA                                                                                         | 217/30<br>434/45 | 43.9 +/- 14.2<br>44.0 +/- 14.2 | 40%/60%<br>40%/60% | Fulfilled the CASPAR criteria | A cancer diagnosis in the Mayo Clinic Cancer Registry or from medical charts (keratinocyte cancer) | HR <sub>adj</sub> (CI)<br>1.41 (0.96–2.07) | –          | Age– and sex–matched controls |
| Chiricozzi <sup>107</sup><br>2016<br>Italy                                                                                   | 199/2            | 52.3 +/- 12.1                  | 98/101             | Hospital diagnosed PsA        | Not reported                                                                                       | –                                          | Adalimumab | –                             |
| *The study reported on all hematologic and solid cancers, which is interpreted as all cancers excluding keratinocyte cancer. |                  |                                |                    |                               |                                                                                                    |                                            |            |                               |

## eReferences

1. Bailin PL. Is Methotrexate Therapy for Psoriasis Carcinogenic? *Jama*. 2011;232(4):359. doi:10.1001/jama.1975.03250040013017
2. Pittelkow MR, Perry HO, Muller SA, Maughan WZ, O'Brien PC. Skin cancer in patients with psoriasis treated with coal tar. A 25-year follow-up study. *Arch Dermatol*. 1981;117(8):465–468.
3. Kenneth M. Halprin, M.D., Mary Comerford, B.A., and J. Richard Taylor, M.D. Miami F. Cancer in patients with psoriasis. *JAmAcadDermatol*. 1982;7:633–638.
4. Alderson MR, Clarke JA. Cancer incidence in patients with psoriasis. *Br J Cancer*. 1983;47(6):857–859. doi:10.1038/bjc.1983.142
5. Nyfors A, Jensen H. Frequency of malignant neoplasms in 248 long-term methotrexate-treated psoriatics: A preliminary study. *Dermatology*. 1983;167(5):260–261. doi:10.1159/000249793
6. Jones SK, Mackie RM, Hole DJ, Gillis CR. Further evidence of the safety of tar in the management of psoriasis. *Br J Dermatol*. 1985;113(1):97–101. doi:10.1111/j.1365–2133.1985.tb02048.x
7. Peng YN, Jiang JJ, Qin SD, Li JY. A trace investigation of 213 outpatients with psoriasis. *Chin Med J (Engl)*. 1985;98(7):497–500.
8. Liu CH, Yu XF, Ma YS, Shu QF, Wang HY, Lin SZ. Long-term follow-up of 344 Shanghai psoriatics. *Chin Med J (Engl)*. 1989;102(2):120–123.
9. Powles A V, Baker BS, Valdimarsson H, Hulme B, Fry L. Four years of experience with cyclosporin A for psoriasis. *Br J Dermatol*. 2006;122(s36):13–19. doi:10.1111/j.1365–2133.1990.tb02877.x
10. Grossman RM, Chevret S, Abi-Rached J, Blanchet F, Dubertret L. Long-term safety of cyclosporine in the treatment of psoriasis. *Arch Dermatol*. 1996;132(6):623–629. doi:10.1001/archderm.132.6.623
11. Frentz G, Olsen JH. Malignant tumours and psoriasis: A follow-up study. *Br J Dermatol*. 1999;140(2):237–242. doi:10.1046/j.1365–2133.1999.02655.x
12. Frentz G, Olsen JH, Avrach WW. Malignant tumours and psoriasis: Climatotherapy at the Dead Sea. *Br J Dermatol*. 1999;141(6):1088–1091. doi:10.1046/j.1365–2133.1999.03161.x
13. Hannuksela-Svahn A, Pukkala E, Koulu L, Jansen CT, Karvonen J. Cancer incidence among Finnish psoriasis patients treated with 8-methoxypsoralen bath PUVA. *J Am Acad Dermatol*. 1999;40(5 Pt 1):694–696. doi:10.1016/S0190–9622(99)70148–9
14. Hannuksela-Svahn A, Pukkala E, Läärä E, Poikolainen K, Karvonen J. Psoriasis, its treatment, and cancer in a cohort of Finnish patients. *J Invest Dermatol*. 2000;114(3):587–590. doi:10.1046/j.1523–1747.2000.00898.x

15. Haustein UF, Rytter M. Methotrexate in psoriasis: 26 years' experience with low-dose long-term treatment. *J Eur Acad Dermatology Venereol.* 2000;14(5):382–388. doi:10.1046/j.1468–3083.2000.00058.x
16. Margolis D, Bilker W, Hennessy S, Vittorio C, Santanna J, Strom BL. The risk of malignancy associated with psoriasis. *Arch Dermatol.* 2001;137(6):778–783. <http://www.ncbi.nlm.nih.gov/pubmed/11405770>.
17. Paul CF, Ho VC, McGeown C, et al. Risk of Malignancies in Psoriasis Patients Treated with Cyclosporine: a 5 y Cohort Study. *J Invest Dermatol.* 2003;120(2):211–216. doi:10.1046/j.1523–1747.2003.12040.x
18. Weischer M, Blum A, Eberhard F, Röcken M, Berneburg M. No evidence for increased skin cancer risk in psoriasis patients treated with broadband or narrowband UVB phototherapy: A first retrospective study. *Acta Derm Venereol.* 2004;84(5):370–374. doi:10.1080/00015550410026948
19. Smith CH, Jackson K, Bashir SJ, et al. Infliximab for severe, treatment-resistant psoriasis: a prospective, open-label study. *Br J Dermatol.* 2006;155(1):160–169. doi:10.1111/j.1365–2133.2006.07316.x
20. Ahmad K, Rogers S. Two years of experience with etanercept in recalcitrant psoriasis. *Br J Dermatol.* 2007;156(5):1010–1014. doi:10.1111/j.1365–2133.2007.07829.x
21. Antoniou C, Vergou T, Dessinioti C, et al. Etanercept: effectiveness and safety data of a retrospective study. *J Eur Acad Dermatology Venereol.* 2011;25(9):1112–1113. doi:10.1111/j.1468–3083.2010.03802.x
22. Brunasso A, Puntoni M, Salvini C, et al. Tolerability and safety of biological therapies for psoriasis in daily clinical practice: A study of 103 Italian patients. *Acta Derm Venereol.* 2011;91(1):44–49. <http://www.embase.com/search/results?subaction=viewrecord&from=export&id=L361140164%5Cnhttp://www.medicaljournals.se/acta/content/download.php?doi=10.2340/00015555–0959%5Cnhttp://dx.doi.org/10.2340/00015555–0959%5Cnhttp://gerion.greendata.es:443/sfxlcl3?s>.
23. Van Lümig PPM, Driessen RJB, Berends MAM, Boezeman JBM, Van De Kerkhof PCM, De Jong EMGJ. Safety of treatment with biologics for psoriasis in daily practice: 5-year data. *J Eur Acad Dermatology Venereol.* 2012;26(3):283–291. doi:10.1111/j.1468–3083.2011.04044.x
24. Garcia-Doval I, Carretero G, Vanaclocha F, et al. Risk of serious adverse events associated with biologic and nonbiologic psoriasis systemic therapy: Patients ineligible vs eligible for randomized controlled trials. *Arch Dermatol.* 2012;148(4):463–470. doi:<http://dx.doi.org/10.1001/archdermatol.2011.2768>
25. Lan C-CE, Ko Y-C, Yu H-S, et al. Psoriatic patients with diabetes are prone to develop digestive organ cancers: A population-based study in Taiwan. *J Dermatol Sci.* 2012;68(2):82–88. doi:10.1016/j.jdermsci.2012.08.004
26. Puig L, Camacho Martínez FM, Gimeno Carpio E, López-Ávila A, García-Calvo C. Efficacy and Safety of Clinical Use of Etanercept for the



- Treatment of Moderate-to-Severe Psoriasis in Spain: Results of a Multicentric Prospective Study at 12 Months Follow-Up. *Dermatology*. 2012;225(3):220–230. doi:10.1159/000343605
27. Staumont-Sallé D, Florin V, Cottencin AC, Chaby G, Delaporte E. Management of moderate to severe psoriasis with systemic immunomodulatory therapies: A 5-year experience from two departments of dermatology of Northern France. *J Eur Acad Dermatol Venereol*. 2012;26(8):1038–1039. doi:10.1111/j.1468–3083.2011.04180.x
  28. Andrea Conti, Giovanna Galdo MG, Stefania Borsari CL. Long-Term Safety and Efficacy of Etanercept in Patients with Moderate-to-Severe Psoriasis: 5-Years Data Experience. 2011:84–87.
  29. Gulliver W, Gladney N, Collins K, Morrissey A. Risk of developing cancer among patients with psoriasis compared with patients without psoriasis. *Br J Dermatol*. 2014;171(6):e134. doi:http://dx.doi.org/10.1111/bjd.13488
  30. Kimball AB, Rothman KJ, Kricorian G, et al. OBSERVE-5: Observational postmarketing safety surveillance registry of etanercept for the treatment of psoriasis final 5-year results. *J Am Acad Dermatol*. 2015;72(1):115–122. doi:10.1016/j.jaad.2014.08.050
  31. Branisteanu DE, Voicu CM, Cretu A, Dimitriu A, Luca MC. Adverse reactions of biological therapy for psoriasis. *Rev Med Chir Soc Med Nat Iasi*. 2015;119(1):38–44. http://ovidsp.ovid.com/ovidweb.cgi?T=JS&PAGE=reference&D=emed13&NEWS=N&AN=25970940.
  32. Feldman SR, Zhao Y, Shi L, Tran MH. Economic and Comorbidity Burden Among Patients with Moderate-to-Severe Psoriasis. *J Manag Care Spec Pharm*. 2016;21(10):874–888. doi:10.18553/jmcp.2015.21.10.874
  33. Lijnen R, Otters E, Balak D, Thio B. Long-term safety and effectiveness of high-dose dimethylfumarate in the treatment of moderate to severe psoriasis: A prospective single-blinded follow-up study. *J Dermatolog Treat*. 2016;27(1):31–36. doi:10.3109/09546634.2015.1050980
  34. Spehr C, Reich K, Mrowietz U, Radtke MA, Thaci D, Rustenbach SJ. PsoBest: Drug safety in systemic treatments for psoriasis and psoriatic arthritis. *J Invest Dermatol*. 2015;135(SUPPL. 3):S19. http://ovidsp.ovid.com/ovidweb.cgi?T=JS&PAGE=reference&D=emed16&NEWS=N&AN=72294133.
  35. Asgari MM, Ray GT, Geier JL, Quesenberry CP. Malignancy rates in a large cohort of patients with systemically treated psoriasis in a managed care population. *J Am Acad Dermatol*. 2017;76(4):632–638. doi:10.1016/j.jaad.2016.10.006
  36. Esposito M, Gisondi P, Conti A, et al. Dose adjustment of biologic therapies for psoriasis in dermatological practice: a retrospective study. *J Eur Acad Dermatol Venereol*. 2017;31(5):863–869. doi:10.1111/jdv.14145
  37. Chiesa Fuxench ZC, Shin DB, Ogdie Beatty A, Gelfand JM. The Risk of Cancer in Patients With Psoriasis. *JAMA Dermatology*. 2015;152(3):282. doi:10.1001/jamadermatol.2015.4847
  38. Vergou T, Moustou AE, Antoniou C. Five-year experience with Ustekinumab for psoriasis: real-life data of a single centre. *J Eur Acad Dermatol Venereol*. 2017;31(1):e40–e41. doi:10.1111/jdv.13658

39. Menter A, Thaçi D, Wu JJ, et al. Long-Term Safety and Effectiveness of Adalimumab for Moderate to Severe Psoriasis: Results from 7-Year Interim Analysis of the ESPRIT Registry. *Dermatol Ther (Heidelb)*. 2017;7(3):365–381. doi:10.1007/s13555-017-0198-x
40. Kreimer J, Crespo A, Chaparro E, Gonzalez D, Rosana V. Psoriasis and cancer. retrospective study in the psoriasis sector of the dermatology service at ramos mejia hospital. *Acta Derm Venereol*. 2018;98(Supplement 219):9. doi:http://dx.doi.org/10.2340/00015555-2978
41. Lee JH, Kim HJ, Han K Do, et al. Cancer risk in 892 089 patients with psoriasis in Korea: A nationwide population-based cohort study. *J Dermatol*. 2019;46(2):95–102. doi:10.1111/1346-8138.14698
42. Wu J, Armstrong A, Singh R, et al. Adverse Medical Conditions Across Treatment Options in Patients With Psoriasis: A Claims-Based Analysis. *J Drugs Dermatol*. 2018;17(11):1211–1218. http://www.ncbi.nlm.nih.gov/pubmed/30500143.
43. Lindelöf B, Eklund G, Lidén S, Stern RS. The prevalence of malignant tumors in patients with psoriasis. *J Am Acad Dermatol*. 1990;22(6):1056–1060. doi:10.1016/0190-9622(90)70152-8
44. Goldfarb MT, Stern RS, Baughman RD, Lowe N, Fitzgerald E, Ellis CN. The safety of etretinate as long-term therapy for psoriasis: Results of the Etretinate Follow-up Study. *J Am Acad Dermatol*. 2004;33(1):44–52. doi:10.1016/0190-9622(95)90008-x
45. Hannuksela-Svahn A, Sigurgeirsson R, Pukkala E, et al. Trioxsalen bath PUVA did not increase the risk of squamous cell skin carcinoma and cutaneous malignant melanoma in a joint analysis of 944 Swedish and Finnish patients with psoriasis. *Br J Dermatol*. 2002;141(3):497–501. doi:10.1046/j.1365-2133.1999.03044.x
46. Lindelöf B, Sigurgeirsson B, Tegner E, et al. PUVA and cancer risk: the Swedish follow-up study. *Br J Dermatol*. 2003;141(1):108–112. doi:10.1046/j.1365-2133.1999.02928.x
47. Väkevä L, Reitamo S, Pukkala E, Sarna S, Ranki A. Long-term follow-up of cancer risk in patients treated with short-term cyclosporine. *Acta Derm Venereol*. 2008;88(2):117–120. doi:10.2340/00015555-0360
48. Brauchli YB, Jick SS, Miret M, Meier CR. Psoriasis and risk of incident cancer: An inception cohort study with a nested case-control analysis. *J Invest Dermatol*. 2009;129(11):2604–2612. doi:10.1038/jid.2009.113
49. Ji J, Shu X, Sundquist K, Sundquist J, Hemminki K. Cancer risk in hospitalised psoriasis patients: a follow-up study in Sweden. *Br J Cancer*. 2009;100(9):1499–1502. doi:10.1038/sj.bjc.6605027
50. Prizment AE, Alonso A, Folsom AR, et al. Association between psoriasis and incident cancer: The Iowa's Women's Health Study. *Cancer Causes Control*. 2011;22(7):1003–1010. doi:10.1007/s10552-011-9773-0
51. Yun H, Winthrop KL, Chen L, et al. Risk of malignancy among medicare psoriasis/psoriasis arthritis patients. *Arthritis Rheumatol*. 2014;66(SUPPL. 10):S813. doi:http://dx.doi.org/10.1002/art.38914

52. Menter A, Thaçi D, Papp KA, et al. Five-year analysis from the ESPRIT 10-year postmarketing surveillance registry of adalimumab treatment for moderate to severe psoriasis. *J Am Acad Dermatol*. 2015;73(3):410–419.e6. doi:10.1016/j.jaad.2015.06.038
53. Li WQ, Han J, Cho E, et al. Personal history of psoriasis and risk of incident cancer among women: A population-based cohort study. *Br J Dermatol*. 2016;174(5):1108–1111. doi:10.1111/bjd.14301
54. Fiorentino D, Ho V, Mark G, Lebwohl, et al. Risk of malignancy with systemic psoriasis treatment in the Psoriasis Longitudinal Assessment Registry. *J Am Acad Dermatol*. 2017;77(5):845–854.e5. doi:10.1016/j.jaad.2017.07.013
55. Magnano M, Bardazzi F, Sgubbi P, et al. Risk of malignancy in psoriatic patients: Our clinical experience. *Dermatol Ther*. 2017;30(4):e12476. doi:10.1111/dth.12476
56. Napolitano M, Megna M, Patrì A, et al. Systemic treatment for psoriasis and malignancies: A real risk? *Dermatol Ther*. 2017;30(4):e12508. doi:10.1111/dth.12508
57. Alan Menter, M.D. and David L. Cram MD. The Goeckerman regimen in two psoriasis day care centers. *J Am Acad Dermatol*. 1983;9(1):59–65. doi:10.1016/S0190–9622(83)70107–6
58. Reshad H, Challoner F, Pollock DJ, Baker H. Cutaneous carcinoma in psoriatic patients treated with PUVA. *Br J Dermatol*. 1984;110(3):299–305. doi:10.1111/j.1365–2133.1984.tb04635.x
59. Leone GA, Shelk JL. Photochemotherapy (PUVA) and skin cancer. *J Am Acad Dermatol*. 1985;13(1):155–156. doi:10.1016/S0190–9622(85)80335–2
60. Torinuki W, Tagami H. Incidence of skin cancer in Japanese psoriatic patients treated with either methoxsalen phototherapy, Goeckerman regimen, or both therapies: A 10-year follow-up study. *J Am Acad Dermatol*. 1988;18(6):1278–1281. doi:10.1016/S0190–9622(88)70135–8
61. Forman AB, Roenigk HH, Caro WA, Magid ML. Long-term Follow-up of Skin Cancer in the PUVA-48 Cooperative Study. *Arch Dermatol*. 1989;125(4):515–519. doi:10.1001/archderm.1989.01670160063009
62. Takashima A, Matsunami E, Yamamoto K, Kitajima S, Mizuno N. Cutaneous carcinoma and 8-methoxypsoralen and ultraviolet A (PUVA) lentiginos in Japanese patients with psoriasis treated with topical PUVA: a follow-up study of 214 patients. *Photodermatol Photoimmunol Photomed*. 1990;7(5):218–221.
63. Mali-Gerrits MGH, Gaasbeek D, Boezeman J, Van de Kerkhof PCM. Psoriasis therapy and the risk of skin cancers. *Clin Exp Dermatol*. 1991;16(2):85–89. doi:10.1111/j.1365–2230.1991.tb00314.x
64. van Praag MC, Bavinck JN, Bergman W, et al. PUVA keratosis. *J Am Acad Dermatol*. 2009;28(3):412–417. doi:10.1016/0190–9622(93)70060–7
65. Warren RB, Brown BC, Lavery D, Ashcroft DM, Griffiths CE. Biologic therapies for psoriasis: practical experience in a U.K. tertiary referral

centre. *Br J Dermatol*. 2008;160(1):162–169. doi:10.1111/j.1365–2133.2008.08865.x

66. Lee MS, Lin RY, Chang YT, Lai MS. The risk of developing non–melanoma skin cancer, lymphoma and melanoma in patients with psoriasis in Taiwan: A 10–year, population–based cohort study. *Int J Dermatol*. 2012;51(12):1454–1460. doi:10.1111/j.1365–4632.2011.05310.x
67. Stern RS. The risk of squamous cell and basal cell cancer associated with psoralen and ultraviolet A therapy: A 30–year prospective study. *J Am Acad Dermatol*. 2012;66(4):553–562. doi:10.1016/j.jaad.2011.04.004
68. Van Lümig PPM, Menting SP, Van Den Reek JMPA, et al. An increased risk of non–melanoma skin cancer during TNF–inhibitor treatment in psoriasis patients compared to rheumatoid arthritis patients probably relates to disease–related factors. *J Eur Acad Dermatology Venereol*. 2015;29(4):752–760. doi:10.1111/jdv.12675
69. Dai H, Li W–Q, Qureshi AA, Han J. Personal history of psoriasis and risk of nonmelanoma skin cancer (NMSC) among women in the United States: A population–based cohort study. *J Am Acad Dermatol*. 2016;75(4):731–735. doi:http://dx.doi.org/10.1016/j.jaad.2016.05.021
70. Egeberg A, Thyssen JP, Gislason GH, Skov L. Skin cancer in patients with psoriasis. *J Eur Acad Dermatology Venereol*. 2016;30(8):1349–1353. doi:10.1111/jdv.13619
71. Maiorino A, De Simone C, Perino F, Caldarola G, Peris K. Melanoma and non–melanoma skin cancer in psoriatic patients treated with high–dose phototherapy. *J Dermatolog Treat*. 2016;27(5):443–447. doi:10.3109/09546634.2015.1133882
72. Paradisi A, Didona B, Tabolli S, et al. Reduced frequency of non–melanoma skin cancer in 72,739 patients with psoriasis: A retrospective study. *Eur J Dermatology*. 2017;27(4):359–362. doi:10.1684/ejd.2017.3032
73. Serrano LM, Lee DE, Ibler E, et al. LB942 Ratio of basal cell carcinoma to squamous cell carcinoma in a large U.S. population of patients with psoriasis. *J Invest Dermatol*. 2017;137(10):B3. doi:10.1016/j.jid.2017.07.015
74. Avina–Zubieta JA, Dominique A, Simon TA. Risk of cancer in patients with psoriasis/ psoriatic arthritis: A population–based study in the province of British Columbia. 2019:115.1–115. doi:10.1136/annrheumdis–2018–eular.7093
75. Lin TL, Wu CY, Chang YT, et al. Risk of skin cancer in psoriasis patients receiving long–term narrowband ultraviolet phototherapy: Results from a Taiwanese population–based cohort study. *Photodermatol Photoimmunol Photomed*. 2019;(November 2018):1–8. doi:10.1111/phpp.12443
76. Mason KJ. The risk of keratinocyte carcinoma (KC) in psoriasis patients receiving biologic therapy compared with conventional systemic therapy: Results from the British Association of Dermatologists Biologic Interventions Register (BADBIR). *Pharmacoepidemiol Drug Saf*. 2018;27(5 Supplement 1):17. doi:http://dx.doi.org/10.1002/pds.4629
77. Raone B, Patrizi A, Gurioli C, Gazzola A, Ravaioli GM. Cutaneous carcinogenic risk evaluation in 375 patients treated with narrowband–UVB phototherapy: A 15–year experience from our Institute. *Photodermatol Photoimmunol Photomed*. 2018;34(5):302–306. doi:10.1111/phpp.12382

78. Stern RS. The risk of melanoma in association with long-term exposure to PUVA. *J Am Acad Dermatol*. 2001;44(5):755–761. doi:<http://dx.doi.org/10.1067/mjd.2001.114576>
79. Hearn RMR, Kerr AC, Rahim KF, Ferguson J, Dawe RS. Incidence of skin cancers in 3867 patients treated with narrow-band ultraviolet B phototherapy. *Br J Dermatol*. 2008;159(4):931–935. doi:10.1111/j.1365–2133.2008.08776.x
80. Le HV, Truong CT, Priest J, Averell C, Eastman J. Prevalence, selected co-morbidities and systemic therapies in a U.S. Population-based cutaneous psoriasis cohort. *Pharmacoepidemiol Drug Saf*. 2013;22(SUPPL. 1):318. doi:<http://dx.doi.org/10.1002/pds.3512>
81. Reddy SP, Martires K, Wu JJ. The risk of melanoma and hematologic cancers in patients with psoriasis. *J Am Acad Dermatol*. 2017;76(4):639–647.e2. doi:10.1016/j.jaad.2016.09.047
82. Gelfand JM, Berlin J, Van Voorhees A, Margolis DJ. Lymphoma Rates Are Low but Increased in Patients With Psoriasis. *Arch Dermatol*. 2003;139(11). doi:10.1001/archderm.139.11.1425
83. Gelfand JM, Shin DB, Neimann AL, Wang X, Margolis DJ, Troxel AB. The risk of lymphoma in patients with psoriasis. *J Invest Dermatol*. 2006;126(10):2194–2201. doi:10.1038/sj.jid.5700410
84. Stern RS. Lymphoma Risk in Psoriasis. *Arch Dermatol*. 2006;142(9). doi:10.1001/archderm.142.9.1132
85. Stern RS, Väkevä LH, Bauer E, et al. Noncutaneous malignant tumors in the PUVA follow-up study: 1975–1996. *J Invest Dermatol*. 1997;108(6):897–900. doi:<http://dx.doi.org/10.1111/1523–1747.ep12292698>
86. Roelofzen JHJ, Aben KKH, Oldenhof UTH, et al. No Increased Risk of Cancer after Coal Tar Treatment in Patients with Psoriasis or Eczema. *J Invest Dermatol*. 2009;130(4):953–961. doi:10.1038/jid.2009.389
87. Fallah M, Liu X, Ji J, Försti A, Sundquist K, Hemminki K. Autoimmune diseases associated with non-Hodgkin lymphoma: a nationwide cohort study. *Ann Oncol*. 2014;25(10):2025–2030. doi:10.1093/annonc/mdu365
88. Fallah M, Liu X, Ji J, Försti A, Sundquist K, Hemminki K. Hodgkin lymphoma after autoimmune diseases by age at diagnosis and histological subtype. *Ann Oncol*. 2014;25(7):1397–1404. doi:10.1093/annonc/mdu144
89. Kamstrup MR, Skov L, Zachariae C, Thyssen JP, Egeberg A. Psoriasis and risk of malignant lymphoma: a population-based cohort study. *Br J Dermatol*. 2018;178(6):1435–1436. doi:10.1111/bjd.16245
90. Olsen JH, Moller H, Frenzt G, Møller H, Frenzt G. Malignant tumors in patients with psoriasis. *J Am Acad Dermatol*. 1992;27(5):716–722. doi:10.1016/0190–9622(92)70244–A
91. Laws PM, Downs AM, Parslew R, et al. Practical experience of ustekinumab in the treatment of psoriasis: Experience from a multicentre, retrospective case cohort study across the U.K. and Ireland. *Br J Dermatol*. 2012;166(1):189–195. doi:10.1111/j.1365–2133.2011.10638.x

92. Stern RS, Väkevä LH, Bauer E, et al. Noncutaneous malignant tumors in the PUVA follow-up study: 1975–1996. *J Invest Dermatol.* 1997;108(6):897–900. doi:10.1111/1523-1747.ep12292698
93. Chen YJ, Wu CY, Chen TJ, et al. The risk of cancer in patients with psoriasis: A population-based cohort study in Taiwan. *J Am Acad Dermatol.* 2011;65(1):84–91. doi:10.1016/j.jaad.2010.04.046
94. Hemminki K, Liu X, Ji J, Försti A, Sundquist J, Sundquist K. Effect of autoimmune diseases on risk and survival in female cancers. *Gynecol Oncol.* 2012;127(1):180–185. doi:10.1016/j.ygyno.2012.07.100
95. Stern RS, Lange R, Members of the Photochemotherapy Follow-up Study. Cardiovascular disease, cancer, and cause of death in patients with psoriasis: 10 years prospective experience in a cohort of 1,380 patients. *J Invest Dermatol.* 1988;91(3):197–201. doi:10.1111/1523-1747.ep12464847
96. Hemminki K, Liu X, Ji J, Sundquist J, Sundquist K. Autoimmune disease and subsequent digestive tract cancer by histology. *Ann Oncol.* 2012;23(4):927–933. doi:10.1093/annonc/mdr333
97. Liu X, Ji J, Forsti A, Sundquist K, Sundquist J, Hemminki K. Autoimmune Disease and Subsequent Urological Cancer. *J Urol.* 2012;189(6):2262–2268. doi:10.1016/j.juro.2012.12.014
98. Papp K, Gottlieb AB, Naldi L, et al. Safety Surveillance for Ustekinumab and Other Psoriasis Treatments From the Psoriasis Longitudinal Assessment and Registry (PSOLAR). *J Drugs Dermatol.* 2015;14(7):706–714. <http://www.ncbi.nlm.nih.gov/pubmed/26151787>.
99. Egeberg A, Ottosen MB, Gniadecki R, et al. Safety, efficacy and drug survival of biologics and biosimilars for moderate-to-severe plaque psoriasis. *Br J Dermatol.* 2018;178(2):509–519. doi:http://dx.doi.org/10.1111/bjd.16102
100. Rohekar S, Tom BDMM, Hassa A, Schentag CT, Farewell VT, Gladman DD. Prevalence of malignancy in psoriatic arthritis. *Arthritis Rheum.* 2008;58(1):82–87. doi:10.1002/art.23185
101. Wade RL, Kindermann SL, Hou Q. Population Characteristics, Treatment Patterns and Medical Events in Patients with Psoriatic Arthritis. *Pharmacoepidemiol Drug Saf.* 2013;22(1, SI):441.
102. Gross RL, Schwartzman-Morris JS, Krathen M, et al. A comparison of the malignancy incidence among patients with psoriatic arthritis and patients with rheumatoid arthritis in a large us cohort. *Arthritis Rheumatol.* 2014;66(6):1472–1481. doi:http://dx.doi.org/10.1002/art.38385
103. Mahboubia J, Amira M, Mongi T, et al. Comorbidities in Patients with Psoriatic Arthritis. *Clin Exp Rheumatol.* 2014;32(4, 83):S51.
104. Fagerli KM, Mercer LK, Watson KD, Packham J, Symmons DPM. Risk of cancer in patients with severe psoriatic arthritis requiring tumour-necrosis factor alpha inhibition. 2015;85(April):101–102.
105. Hagiwara K, Suyama Y, Fukuda K. Clinical experience in 115 patients with arthritis and/or enthesitis who met the classification criteria for

psoriatic arthritis (CASPAR) within the last two years—Possible association with malignant disorders. *Mod Rheumatol*. 2016;26(4):625–629. doi:10.3109/14397595.2015.1097000

106. de Vlam K, Boone C. Treatment adherence, efficacy, and safety of etanercept in patients with active psoriatic arthritis and peripheral involvement in Belgium for 66 months (PROVE study). *Clin Exp Rheumatol*. 2015;33(5):624–631. <http://www.clinexprheumatol.org/article.asp?a=8597>.
107. Chiricozzi A, Zangrilli A, Bavetta M, Bianchi L, Chimenti S, Saraceno R. Real-life 9-year experience with adalimumab in psoriasis and psoriatic arthritis: results of a single-centre, retrospective study. *J Eur Acad Dermatology Venereol*. 2017;31(2):304–311. doi:10.1111/jdv.13771
108. Costa L, Caso F, Del Puente A, Di Minno MND, Peluso R, Scarpa R. Incidence of malignancies in a cohort of psoriatic arthritis patients taking traditional disease modifying antirheumatic drug and tumor necrosis factor inhibitor therapy: An observational study. *J Rheumatol*. 2016;43(12):2149–2154. doi:10.3899/jrheum.160542
109. Hagberg KW, Li L, Peng M, Paris M, Shah K, Jick SS. Rates of Cancers and Opportunistic Infections in Patients with Psoriatic Arthritis Compared with Patients Without Psoriatic Arthritis. *J Clin Rheumatol*. 2016;22(5):241–247. doi:10.1097/RHU.0000000000000364
110. Hellgren K, Dreyer L, Arkema E V., et al. Cancer risk in patients with spondyloarthritis treated with TNF inhibitors: A collaborative study from the ARTIS and DANBIO registers. *Ann Rheum Dis*. 2017;76(1):105–111. doi:10.1136/annrheumdis-2016-209270
111. Wilton KM, Crowson CS, Matteson EL. Malignancy incidence in patients with psoriatic arthritis: a comparison cohort-based incidence study. *Clin Rheumatol*. 2016;35(10):2603–2607. doi:10.1007/s10067-016-3396-5
112. Mease PJ, Litman HJ, Accortt NA, et al. Disease activity and patient characteristics by comorbidity among psoriatic arthritis (PSA) patients in a us registry. 2019;(June):379.2–380. doi:10.1136/annrheumdis-2018-eular.1275

**eTable 2 – Newcastle Ottawa scale**

|                                        | Selection | comparability | Outcome | Total |
|----------------------------------------|-----------|---------------|---------|-------|
| Bailin (1975) <sup>1</sup>             | 2         |               | 1       | 3     |
| Pittelkow (1981) <sup>2</sup>          | 1         |               | 2       | 3     |
| Halprin (1982) <sup>3</sup>            | 3         |               | 1       | 4     |
| Alderson (1983) <sup>4</sup>           | 2         | 2             | 2       | 6     |
| Nyfors (1983) <sup>5</sup>             | 1         | 2             | 2       | 5     |
| Jones (1985) <sup>6</sup>              | 2         | 2             | 2       | 6     |
| Peng (1985) <sup>7</sup>               | 2         |               | 0       | 2     |
| Liu (1989) <sup>8</sup>                | 2         |               | 1       | 3     |
| Powles (1990) <sup>9</sup>             | 1         |               | 2       | 3     |
| Grossman (1996) <sup>10</sup>          | 2         |               | 1       | 3     |
| Frentz (1999a) <sup>11</sup>           | 2         |               | 2       | 4     |
| Frentz (1999b) <sup>12</sup>           | 1         | 2             | 3       | 6     |
| Hannuksela–Svahn (1999a) <sup>13</sup> | 1         | 2             | 2       | 5     |
| Hannuksela–Svahn (2000) <sup>14</sup>  | 2         | 2             | 3       | 7     |
| Haustein (2000) <sup>15</sup>          | 2         |               | 1       | 3     |
| Margolis (2001) <sup>16</sup>          | 4         | 2             | 2       | 8     |
| Paul (2003) <sup>17</sup>              | 2         | 2             | 1       | 5     |
| Weischer (2004) <sup>18</sup>          | 2         |               | 3       | 5     |
| Smith (2006) <sup>19</sup>             | 1         |               | 2       | 3     |



|                                     |   |   |   |   |
|-------------------------------------|---|---|---|---|
| Ahmad (2006) <sup>20</sup>          | 1 |   | 1 | 2 |
| Antoniou (2010) <sup>21</sup>       | 1 |   | 0 | 1 |
| Brunasso (2011) <sup>22</sup>       | 1 | 1 | 1 | 3 |
| van Lümig (2011) <sup>23</sup>      | 1 | 2 | 1 | 4 |
| Garcia–Doval (2012) <sup>24</sup>   | 2 |   | 0 | 2 |
| Lan (2012) <sup>25</sup>            | 3 | 2 | 2 | 7 |
| Puig (2012) <sup>26</sup>           | 1 |   | 1 | 2 |
| Staumont–Salle (2012) <sup>27</sup> | 1 |   | 1 | 2 |
| Conti (2013) <sup>28</sup>          | 2 |   | 1 | 3 |
| Gulliver (2014) <sup>29</sup>       | 2 |   | 0 | 2 |
| Kimball (2014) <sup>30</sup>        | 2 | 2 | 2 | 6 |
| Brănișteanu (2015) <sup>31</sup>    | 2 |   | 2 | 4 |
| Feldman (2015) <sup>32</sup>        | 3 | 2 | 1 | 6 |
| Lijnen (2015) <sup>33</sup>         | 1 |   | 1 | 2 |
| Spehr (2015) <sup>34</sup>          | 2 |   | 0 | 2 |
| Asgari (2016) <sup>35</sup>         | 2 |   | 2 | 4 |
| Esposito (2016) <sup>36</sup>       | 1 |   | 1 | 2 |
| Fuxench (2016) <sup>37</sup>        | 4 | 2 | 2 | 8 |
| Vergou (2016) <sup>38</sup>         | 1 |   | 2 | 3 |
| Menter (2017) <sup>39</sup>         | 1 |   | 3 | 4 |
| Kreimer (2018) <sup>40</sup>        | 2 |   | 0 | 2 |

|                                        |   |   |   |   |
|----------------------------------------|---|---|---|---|
| Lee (2018) <sup>41</sup>               | 4 | 2 | 2 | 8 |
| Wu (2018) <sup>42</sup>                | 1 | 2 | 1 | 4 |
| Lindelof (1990) <sup>43</sup>          | 1 | 2 | 2 | 5 |
| Stern (1995) <sup>44</sup>             | 1 |   | 1 | 2 |
| Hannuksela–svahn (1999b) <sup>45</sup> | 1 |   | 3 | 4 |
| Lindelof (1999) <sup>46</sup>          | 2 | 1 | 3 | 6 |
| Väkevä (2008) <sup>47</sup>            | 2 | 2 | 2 | 6 |
| Brauchli (2009) <sup>48</sup>          | 4 | 2 | 1 | 7 |
| Ji (2009) <sup>49</sup>                | 3 | 2 | 2 | 7 |
| Prizment (2011) <sup>50</sup>          | 4 | 2 | 3 | 9 |
| Yun (2014) <sup>51</sup>               | 3 | 2 | 1 | 6 |
| Menter (2015) <sup>52</sup>            | 1 |   | 2 | 3 |
| Li (2016) <sup>53</sup>                | 4 | 2 | 2 | 8 |
| Fiorentino (2017) <sup>54</sup>        | 3 |   | 1 | 4 |
| Magnano (2017) <sup>55</sup>           | 1 |   | 2 | 3 |
| Napolitano (2017) <sup>56</sup>        | 2 |   | 0 | 2 |
| Menter (1983) <sup>57</sup>            | 1 |   | 1 | 2 |
| Reshad (1984) <sup>58</sup>            | 1 |   | 1 | 2 |
| Leone (1985) <sup>59</sup>             | 1 |   | 1 | 2 |
| Torinuki (1988) <sup>60</sup>          | 1 |   | 2 | 3 |
| Forman (1989) <sup>61</sup>            | 1 |   | 2 | 3 |

|                                    |   |   |   |   |
|------------------------------------|---|---|---|---|
| Takashima (1990) <sup>62</sup>     | 1 |   | 1 | 2 |
| Mali–Gerrit (1991) <sup>63</sup>   | 2 |   | 2 | 4 |
| van Praag (1993) <sup>64</sup>     | 1 |   | 2 | 3 |
| Warren (2008) <sup>65</sup>        | 1 |   | 0 | 1 |
| Lee (2012) <sup>66</sup>           | 4 | 2 | 2 | 8 |
| Stern (2012) <sup>67</sup>         | 2 | 2 | 3 | 7 |
| van Lümig (2015) <sup>68</sup>     | 3 | 2 | 2 | 7 |
| Dai (2016) <sup>69</sup>           | 4 | 2 | 3 | 9 |
| Egeberg (2016) <sup>70</sup>       | 4 | 2 | 3 | 9 |
| Maiorino (2016) <sup>71</sup>      | 1 |   | 3 | 4 |
| Paradisi (2017) <sup>72</sup>      | 2 | 2 | 2 | 6 |
| Serrano (2017) <sup>73</sup>       | 2 |   | 2 | 4 |
| Avina–Zubieta (2018) <sup>74</sup> | 3 | 2 | 3 | 8 |
| Lin (2018) <sup>75</sup>           | 3 |   | 3 | 6 |
| Mason (2018) <sup>76</sup>         | 2 |   | 0 | 2 |
| Raone (2018) <sup>77</sup>         | 3 |   | 3 | 6 |
| Stern (2001) <sup>78</sup>         | 2 |   | 3 | 5 |
| Hearn (2008) <sup>79</sup>         | 2 | 2 | 3 | 7 |
| Le (2013) <sup>80</sup>            | 2 |   | 1 | 3 |
| Reddy (2016) <sup>81</sup>         | 4 | 2 | 2 | 8 |
| Gelfand (2003) <sup>82</sup>       | 4 | 2 | 2 | 8 |

|                                |   |   |   |   |
|--------------------------------|---|---|---|---|
| Gelfand (2006) <sup>83</sup>   | 3 | 2 | 3 | 8 |
| Stern (2006) <sup>84</sup>     | 2 | 2 | 3 | 7 |
| Stern (1997) <sup>85</sup>     | 2 | 2 | 3 | 7 |
| Roelofzen (2009) <sup>86</sup> | 2 |   | 3 | 5 |
| Fallah (2014a) <sup>87</sup>   | 2 | 2 | 3 | 7 |
| Fallah (2014b) <sup>88</sup>   | 2 | 2 | 3 | 7 |
| Kamstrup (2018) <sup>89</sup>  | 4 | 2 | 2 | 8 |
| Olsen (1992) <sup>90</sup>     | 2 | 2 | 3 | 7 |
| Laws (2012) <sup>91</sup>      | 1 |   | 1 | 2 |
| Stern (1997) <sup>92</sup>     | 2 | 2 | 3 | 7 |
| Chen (2011) <sup>93</sup>      | 4 | 2 | 2 | 8 |
| Hemminiki (2012) <sup>94</sup> | 3 | 2 | 3 | 8 |
| Stern (1988) <sup>95</sup>     | 2 | 2 | 3 | 7 |
| Hemminiki (2011) <sup>96</sup> | 3 | 2 | 3 | 8 |
| Liu (2012) <sup>97</sup>       | 3 | 2 | 3 | 8 |
| Papp (2015) <sup>98</sup>      | 1 |   | 2 | 3 |
| Egeberg (2018) <sup>99</sup>   | 1 |   | 1 | 2 |
| Rohekar (2008) <sup>100</sup>  | 3 | 2 | 2 | 7 |
| Wade (2013) <sup>101</sup>     | 2 |   | 0 | 2 |
| Gross (2014) <sup>102</sup>    | 3 | 2 | 2 | 7 |
| Mahboub (2014) <sup>103</sup>  | 1 |   | 0 | 1 |

|                                  |   |   |   |   |
|----------------------------------|---|---|---|---|
| Fagerli (2015) <sup>104</sup>    | 2 | 2 | 3 | 7 |
| Hagiwara (2016) <sup>105</sup>   | 3 |   | 2 | 5 |
| de Vlam (2015) <sup>106</sup>    | 1 |   | 2 | 3 |
| Chiricozzi (2017) <sup>107</sup> | 1 |   | 1 | 2 |
| Costa (2016) <sup>108</sup>      | 3 | 2 | 3 | 8 |
| Hagberg (2016) <sup>109</sup>    | 4 | 2 | 2 | 8 |
| Hellgren (2017) <sup>110</sup>   | 4 | 2 | 3 | 9 |
| Wilton (2016) <sup>111</sup>     | 4 | 2 | 2 | 8 |
| Mease (2018) <sup>112</sup>      | 3 |   | 2 | 5 |
| Lange (2016) <sup>113</sup>      | 3 |   | 2 | 5 |
| Carmona (2011) <sup>114</sup>    | 3 | 2 | 2 | 7 |

## eReferences

1. Bailin PL. Is Methotrexate Therapy for Psoriasis Carcinogenic? *Jama*. 2011;232(4):359. doi:10.1001/jama.1975.03250040013017
2. Pittelkow MR, Perry HO, Muller SA, Maughan WZ, O'Brien PC. Skin cancer in patients with psoriasis treated with coal tar. A 25-year follow-up study. *Arch Dermatol*. 1981;117(8):465-468.
3. Kenneth M. Halprin, M.D., Mary Comerford, B.A., and J. Richard Taylor, M.D. Miami F. Cancer in patients with psoriasis. *JAmAcadDermatol*. 1982;7:633-638.
4. Alderson MR, Clarke JA. Cancer incidence in patients with psoriasis. *Br J Cancer*. 1983;47(6):857-859. doi:10.1038/bjc.1983.142
5. Nyfors A, Jensen H. Frequency of malignant neoplasms in 248 long-term methotrexate-treated psoriatics: A preliminary study. *Dermatology*. 1983;167(5):260-261. doi:10.1159/000249793
6. Jones SK, Mackie RM, Hole DJ, Gillis CR. Further evidence of the safety of tar in the management of psoriasis. *Br J Dermatol*. 1985;113(1):97-101. doi:10.1111/j.1365-2133.1985.tb02048.x
7. Peng YN, Jiang JJ, Qin SD, Li JY. A trace investigation of 213 outpatients with psoriasis. *Chin Med J (Engl)*. 1985;98(7):497-500.
8. Liu CH, Yu XF, Ma YS, Shu QF, Wang HY, Lin SZ. Long-term follow-up of 344 Shanghai psoriatics. *Chin Med J (Engl)*. 1989;102(2):120-123.
9. Powles A V, Baker BS, Valdimarsson H, Hulme B, Fry L. Four years of experience with cyclosporin A for psoriasis. *Br J Dermatol*. 2006;122(s36):13-19. doi:10.1111/j.1365-2133.1990.tb02877.x
10. Grossman RM, Chevret S, Abi-Rached J, Blanchet F, Dubertret L. Long-term safety of cyclosporine in the treatment of psoriasis. *Arch Dermatol*. 1996;132(6):623-629. doi:10.1001/archderm.132.6.623
11. Frentz G, Olsen JH. Malignant tumours and psoriasis: A follow-up study. *Br J Dermatol*. 1999;140(2):237-242. doi:10.1046/j.1365-2133.1999.02655.x
12. Frentz G, Olsen JH, Avrach WW. Malignant tumours and psoriasis: Climatotherapy at the Dead Sea. *Br J Dermatol*. 1999;141(6):1088-1091. doi:10.1046/j.1365-2133.1999.03161.x
13. Hannuksela-Svahn A, Pukkala E, Koulu L, Jansen CT, Karvonen J. Cancer incidence among Finnish psoriasis patients treated with 8-methoxypsoralen bath PUVA. *J Am Acad Dermatol*. 1999;40(5 Pt 1):694-696. doi:10.1016/S0190-9622(99)70148-9
14. Hannuksela-Svahn A, Pukkala E, Läärä E, Poikolainen K, Karvonen J. Psoriasis, its treatment, and cancer in a cohort of Finnish patients. *J Invest Dermatol*. 2000;114(3):587-590. doi:10.1046/j.1523-1747.2000.00898.x

15. Haustein UF, Rytter M. Methotrexate in psoriasis: 26 years' experience with low-dose long-term treatment. *J Eur Acad Dermatology Venereol.* 2000;14(5):382–388. doi:10.1046/j.1468–3083.2000.00058.x
16. Margolis D, Bilker W, Hennessy S, Vittorio C, Santanna J, Strom BL. The risk of malignancy associated with psoriasis. *Arch Dermatol.* 2001;137(6):778–783. <http://www.ncbi.nlm.nih.gov/pubmed/11405770>.
17. Paul CF, Ho VC, McGeown C, et al. Risk of Malignancies in Psoriasis Patients Treated with Cyclosporine: a 5 y Cohort Study. *J Invest Dermatol.* 2003;120(2):211–216. doi:10.1046/j.1523–1747.2003.12040.x
18. Weischer M, Blum A, Eberhard F, Röcken M, Berneburg M. No evidence for increased skin cancer risk in psoriasis patients treated with broadband or narrowband UVB phototherapy: A first retrospective study. *Acta Derm Venereol.* 2004;84(5):370–374. doi:10.1080/00015550410026948
19. Smith CH, Jackson K, Bashir SJ, et al. Infliximab for severe, treatment-resistant psoriasis: a prospective, open-label study. *Br J Dermatol.* 2006;155(1):160–169. doi:10.1111/j.1365–2133.2006.07316.x
20. Ahmad K, Rogers S. Two years of experience with etanercept in recalcitrant psoriasis. *Br J Dermatol.* 2007;156(5):1010–1014. doi:10.1111/j.1365–2133.2007.07829.x
21. Antoniou C, Vergou T, Dessinioti C, et al. Etanercept: effectiveness and safety data of a retrospective study. *J Eur Acad Dermatology Venereol.* 2011;25(9):1112–1113. doi:10.1111/j.1468–3083.2010.03802.x
22. Brunasso A, Puntoni M, Salvini C, et al. Tolerability and safety of biological therapies for psoriasis in daily clinical practice: A study of 103 Italian patients. *Acta Derm Venereol.* 2011;91(1):44–49. <http://www.embase.com/search/results?subaction=viewrecord&from=export&id=L361140164%5Cnhttp://www.medicaljournals.se/acta/content/download.php?doi=10.2340/00015555–0959%5Cnhttp://dx.doi.org/10.2340/00015555–0959%5Cnhttp://gerion.greendata.es:443/sfxlcl3?s>.
23. Van Lümig PPM, Driessen RJB, Berends MAM, Boezeman JBM, Van De Kerkhof PCM, De Jong EMGJ. Safety of treatment with biologics for psoriasis in daily practice: 5-year data. *J Eur Acad Dermatology Venereol.* 2012;26(3):283–291. doi:10.1111/j.1468–3083.2011.04044.x
24. Garcia-Doval I, Carretero G, Vanaclocha F, et al. Risk of serious adverse events associated with biologic and nonbiologic psoriasis systemic therapy: Patients ineligible vs eligible for randomized controlled trials. *Arch Dermatol.* 2012;148(4):463–470. doi:<http://dx.doi.org/10.1001/archdermatol.2011.2768>
25. Lan C-CE, Ko Y-C, Yu H-S, et al. Psoriatic patients with diabetes are prone to develop digestive organ cancers: A population-based study in Taiwan. *J Dermatol Sci.* 2012;68(2):82–88. doi:10.1016/j.jdermsci.2012.08.004
26. Puig L, Camacho Martínez FM, Gimeno Carpio E, López-Ávila A, García-Calvo C. Efficacy and Safety of Clinical Use of Etanercept for the

- Treatment of Moderate-to-Severe Psoriasis in Spain: Results of a Multicentric Prospective Study at 12 Months Follow-Up. *Dermatology*. 2012;225(3):220–230. doi:10.1159/000343605
27. Staumont-Sallé D, Florin V, Cottencin AC, Chaby G, Delaporte E. Management of moderate to severe psoriasis with systemic immunomodulatory therapies: A 5-year experience from two departments of dermatology of Northern France. *J Eur Acad Dermatology Venereol*. 2012;26(8):1038–1039. doi:10.1111/j.1468–3083.2011.04180.x
  28. Andrea Conti, Giovanna Galdo MG, Stefania Borsari CL. Long-Term Safety and Efficacy of Etanercept in Patients with Moderate-to-Severe Psoriasis: 5-Years Data Experience. 2011:84–87.
  29. Gulliver W, Gladney N, Collins K, Morrissey A. Risk of developing cancer among patients with psoriasis compared with patients without psoriasis. *Br J Dermatol*. 2014;171(6):e134. doi:http://dx.doi.org/10.1111/bjd.13488
  30. Kimball AB, Rothman KJ, Kricorian G, et al. OBSERVE-5: Observational postmarketing safety surveillance registry of etanercept for the treatment of psoriasis final 5-year results. *J Am Acad Dermatol*. 2015;72(1):115–122. doi:10.1016/j.jaad.2014.08.050
  31. Branisteanu DE, Voicu CM, Cretu A, Dimitriu A, Luca MC. Adverse reactions of biological therapy for psoriasis. *Rev Med Chir Soc Med Nat Iasi*. 2015;119(1):38–44. http://ovidsp.ovid.com/ovidweb.cgi?T=JS&PAGE=reference&D=emed13&NEWS=N&AN=25970940.
  32. Feldman SR, Zhao Y, Shi L, Tran MH. Economic and Comorbidity Burden Among Patients with Moderate-to-Severe Psoriasis. *J Manag Care Spec Pharm*. 2016;21(10):874–888. doi:10.18553/jmcp.2015.21.10.874
  33. Lijnen R, Otters E, Balak D, Thio B. Long-term safety and effectiveness of high-dose dimethylfumarate in the treatment of moderate to severe psoriasis: A prospective single-blinded follow-up study. *J Dermatolog Treat*. 2016;27(1):31–36. doi:10.3109/09546634.2015.1050980
  34. Spehr C, Reich K, Mrowietz U, Radtke MA, Thaci D, Rustenbach SJ. PsoBest: Drug safety in systemic treatments for psoriasis and psoriatic arthritis. *J Invest Dermatol*. 2015;135(SUPPL. 3):S19. http://ovidsp.ovid.com/ovidweb.cgi?T=JS&PAGE=reference&D=emed16&NEWS=N&AN=72294133.
  35. Asgari MM, Ray GT, Geier JL, Quesenberry CP. Malignancy rates in a large cohort of patients with systemically treated psoriasis in a managed care population. *J Am Acad Dermatol*. 2017;76(4):632–638. doi:10.1016/j.jaad.2016.10.006
  36. Esposito M, Gisondi P, Conti A, et al. Dose adjustment of biologic therapies for psoriasis in dermatological practice: a retrospective study. *J Eur Acad Dermatology Venereol*. 2017;31(5):863–869. doi:10.1111/jdv.14145
  37. Chiesa Fuxench ZC, Shin DB, Ogdie Beatty A, Gelfand JM. The Risk of Cancer in Patients With Psoriasis. *JAMA Dermatology*. 2015;152(3):282. doi:10.1001/jamadermatol.2015.4847
  38. Vergou T, Moustou AE, Antoniou C. Five-year experience with Ustekinumab for psoriasis: real-life data of a single centre. *J Eur Acad Dermatology Venereol*. 2017;31(1):e40–e41. doi:10.1111/jdv.13658



39. Menter A, Thaçi D, Wu JJ, et al. Long-Term Safety and Effectiveness of Adalimumab for Moderate to Severe Psoriasis: Results from 7-Year Interim Analysis of the ESPRIT Registry. *Dermatol Ther (Heidelb)*. 2017;7(3):365–381. doi:10.1007/s13555-017-0198-x
40. Kreimer J, Crespo A, Chaparro E, Gonzalez D, Rosana V. Psoriasis and cancer. retrospective study in the psoriasis sector of the dermatology service at ramos mejia hospital. *Acta Derm Venereol*. 2018;98(Supplement 219):9. doi:http://dx.doi.org/10.2340/00015555-2978
41. Lee JH, Kim HJ, Han K Do, et al. Cancer risk in 892 089 patients with psoriasis in Korea: A nationwide population-based cohort study. *J Dermatol*. 2019;46(2):95–102. doi:10.1111/1346-8138.14698
42. Wu J, Armstrong A, Singh R, et al. Adverse Medical Conditions Across Treatment Options in Patients With Psoriasis: A Claims-Based Analysis. *J Drugs Dermatol*. 2018;17(11):1211–1218. http://www.ncbi.nlm.nih.gov/pubmed/30500143.
43. Lindelöf B, Eklund G, Lidén S, Stern RS. The prevalence of malignant tumors in patients with psoriasis. *J Am Acad Dermatol*. 1990;22(6):1056–1060. doi:10.1016/0190-9622(90)70152-8
44. Goldfarb MT, Stern RS, Baughman RD, Lowe N, Fitzgerald E, Ellis CN. The safety of etretinate as long-term therapy for psoriasis: Results of the Etretinate Follow-up Study. *J Am Acad Dermatol*. 2004;33(1):44–52. doi:10.1016/0190-9622(95)90008-x
45. Hannuksela-Svahn A, Sigurgeirsson R, Pukkala E, et al. Trioxsalen bath PUVA did not increase the risk of squamous cell skin carcinoma and cutaneous malignant melanoma in a joint analysis of 944 Swedish and Finnish patients with psoriasis. *Br J Dermatol*. 2002;141(3):497–501. doi:10.1046/j.1365-2133.1999.03044.x
46. Lindelöf B, Sigurgeirsson B, Tegner E, et al. PUVA and cancer risk: the Swedish follow-up study. *Br J Dermatol*. 2003;141(1):108–112. doi:10.1046/j.1365-2133.1999.02928.x
47. Väkevä L, Reitamo S, Pukkala E, Sarna S, Ranki A. Long-term follow-up of cancer risk in patients treated with short-term cyclosporine. *Acta Derm Venereol*. 2008;88(2):117–120. doi:10.2340/00015555-0360
48. Brauchli YB, Jick SS, Miret M, Meier CR. Psoriasis and risk of incident cancer: An inception cohort study with a nested case-control analysis. *J Invest Dermatol*. 2009;129(11):2604–2612. doi:10.1038/jid.2009.113
49. Ji J, Shu X, Sundquist K, Sundquist J, Hemminki K. Cancer risk in hospitalised psoriasis patients: a follow-up study in Sweden. *Br J Cancer*. 2009;100(9):1499–1502. doi:10.1038/sj.bjc.6605027
50. Prizment AE, Alonso A, Folsom AR, et al. Association between psoriasis and incident cancer: The Iowa's Women's Health Study. *Cancer Causes Control*. 2011;22(7):1003–1010. doi:10.1007/s10552-011-9773-0
51. Yun H, Winthrop KL, Chen L, et al. Risk of malignancy among medicare psoriasis/psoriasis arthritis patients. *Arthritis Rheumatol*. 2014;66(SUPPL. 10):S813. doi:http://dx.doi.org/10.1002/art.38914

52. Menter A, Thaçi D, Papp KA, et al. Five-year analysis from the ESPRIT 10-year postmarketing surveillance registry of adalimumab treatment for moderate to severe psoriasis. *J Am Acad Dermatol*. 2015;73(3):410–419.e6. doi:10.1016/j.jaad.2015.06.038
53. Li WQ, Han J, Cho E, et al. Personal history of psoriasis and risk of incident cancer among women: A population-based cohort study. *Br J Dermatol*. 2016;174(5):1108–1111. doi:10.1111/bjd.14301
54. Fiorentino D, Ho V, Mark G, Lebwohl, et al. Risk of malignancy with systemic psoriasis treatment in the Psoriasis Longitudinal Assessment Registry. *J Am Acad Dermatol*. 2017;77(5):845–854.e5. doi:10.1016/j.jaad.2017.07.013
55. Magnano M, Bardazzi F, Sgubbi P, et al. Risk of malignancy in psoriatic patients: Our clinical experience. *Dermatol Ther*. 2017;30(4):e12476. doi:10.1111/dth.12476
56. Napolitano M, Megna M, Patrì A, et al. Systemic treatment for psoriasis and malignancies: A real risk? *Dermatol Ther*. 2017;30(4):e12508. doi:10.1111/dth.12508
57. Alan Menter, M.D. and David L. Cram MD. The Goeckerman regimen in two psoriasis day care centers. *J Am Acad Dermatol*. 1983;9(1):59–65. doi:10.1016/S0190–9622(83)70107–6
58. Reshad H, Challoner F, Pollock DJ, Baker H. Cutaneous carcinoma in psoriatic patients treated with PUVA. *Br J Dermatol*. 1984;110(3):299–305. doi:10.1111/j.1365–2133.1984.tb04635.x
59. Leone GA, Shelk JL. Photochemotherapy (PUVA) and skin cancer. *J Am Acad Dermatol*. 1985;13(1):155–156. doi:10.1016/S0190–9622(85)80335–2
60. Torinuki W, Tagami H. Incidence of skin cancer in Japanese psoriatic patients treated with either methoxsalen phototherapy, Goeckerman regimen, or both therapies: A 10-year follow-up study. *J Am Acad Dermatol*. 1988;18(6):1278–1281. doi:10.1016/S0190–9622(88)70135–8
61. Forman AB, Roenigk HH, Caro WA, Magid ML. Long-term Follow-up of Skin Cancer in the PUVA-48 Cooperative Study. *Arch Dermatol*. 1989;125(4):515–519. doi:10.1001/archderm.1989.01670160063009
62. Takashima A, Matsunami E, Yamamoto K, Kitajima S, Mizuno N. Cutaneous carcinoma and 8-methoxypsoralen and ultraviolet A (PUVA) lentigines in Japanese patients with psoriasis treated with topical PUVA: a follow-up study of 214 patients. *Photodermatol Photoimmunol Photomed*. 1990;7(5):218–221.
63. Mali-Gerrits MGH, Gaasbeek D, Boezeman J, Van de Kerkhof PCM. Psoriasis therapy and the risk of skin cancers. *Clin Exp Dermatol*. 1991;16(2):85–89. doi:10.1111/j.1365–2230.1991.tb00314.x
64. van Praag MC, Bavinck JN, Bergman W, et al. PUVA keratosis. *J Am Acad Dermatol*. 2009;28(3):412–417. doi:10.1016/0190–9622(93)70060–7
65. Warren RB, Brown BC, Lavery D, Ashcroft DM, Griffiths CE. Biologic therapies for psoriasis: practical experience in a U.K. tertiary referral

centre. *Br J Dermatol*. 2008;160(1):162–169. doi:10.1111/j.1365–2133.2008.08865.x

66. Lee MS, Lin RY, Chang YT, Lai MS. The risk of developing non–melanoma skin cancer, lymphoma and melanoma in patients with psoriasis in Taiwan: A 10–year, population–based cohort study. *Int J Dermatol*. 2012;51(12):1454–1460. doi:10.1111/j.1365–4632.2011.05310.x
67. Stern RS. The risk of squamous cell and basal cell cancer associated with psoralen and ultraviolet A therapy: A 30–year prospective study. *J Am Acad Dermatol*. 2012;66(4):553–562. doi:10.1016/j.jaad.2011.04.004
68. Van Lümig PPM, Menting SP, Van Den Reek JMPA, et al. An increased risk of non–melanoma skin cancer during TNF–inhibitor treatment in psoriasis patients compared to rheumatoid arthritis patients probably relates to disease–related factors. *J Eur Acad Dermatology Venereol*. 2015;29(4):752–760. doi:10.1111/jdv.12675
69. Dai H, Li W–Q, Qureshi AA, Han J. Personal history of psoriasis and risk of nonmelanoma skin cancer (NMSC) among women in the United States: A population–based cohort study. *J Am Acad Dermatol*. 2016;75(4):731–735. doi:http://dx.doi.org/10.1016/j.jaad.2016.05.021
70. Egeberg A, Thyssen JP, Gislason GH, Skov L. Skin cancer in patients with psoriasis. *J Eur Acad Dermatology Venereol*. 2016;30(8):1349–1353. doi:10.1111/jdv.13619
71. Maiorino A, De Simone C, Perino F, Caldarola G, Peris K. Melanoma and non–melanoma skin cancer in psoriatic patients treated with high–dose phototherapy. *J Dermatolog Treat*. 2016;27(5):443–447. doi:10.3109/09546634.2015.1133882
72. Paradisi A, Didona B, Tabolli S, et al. Reduced frequency of non–melanoma skin cancer in 72,739 patients with psoriasis: A retrospective study. *Eur J Dermatology*. 2017;27(4):359–362. doi:10.1684/ejd.2017.3032
73. Serrano LM, Lee DE, Ibler E, et al. LB942 Ratio of basal cell carcinoma to squamous cell carcinoma in a large U.S. population of patients with psoriasis. *J Invest Dermatol*. 2017;137(10):B3. doi:10.1016/j.jid.2017.07.015
74. Avina–Zubieta JA, Dominique A, Simon TA. Risk of cancer in patients with psoriasis/ psoriatic arthritis: A population–based study in the province of British Columbia. 2019:115.1–115. doi:10.1136/annrheumdis–2018–eular.7093
75. Lin TL, Wu CY, Chang YT, et al. Risk of skin cancer in psoriasis patients receiving long–term narrowband ultraviolet phototherapy: Results from a Taiwanese population–based cohort study. *Photodermatol Photoimmunol Photomed*. 2019;(November 2018):1–8. doi:10.1111/phpp.12443
76. Mason KJ. The risk of keratinocyte carcinoma (KC) in psoriasis patients receiving biologic therapy compared with conventional systemic therapy: Results from the British Association of Dermatologists Biologic Interventions Register (BADBIR). *Pharmacoepidemiol Drug Saf*. 2018;27(5 Supplement 1):17. doi:http://dx.doi.org/10.1002/pds.4629
77. Raone B, Patrizi A, Gurioli C, Gazzola A, Ravaioli GM. Cutaneous carcinogenic risk evaluation in 375 patients treated with narrowband–UVB phototherapy: A 15–year experience from our Institute. *Photodermatol Photoimmunol Photomed*. 2018;34(5):302–306. doi:10.1111/phpp.12382

78. Stern RS. The risk of melanoma in association with long-term exposure to PUVA. *J Am Acad Dermatol*. 2001;44(5):755–761. doi:<http://dx.doi.org/10.1067/mjd.2001.114576>
79. Hearn RMR, Kerr AC, Rahim KF, Ferguson J, Dawe RS. Incidence of skin cancers in 3867 patients treated with narrow-band ultraviolet B phototherapy. *Br J Dermatol*. 2008;159(4):931–935. doi:10.1111/j.1365–2133.2008.08776.x
80. Le HV, Truong CT, Priest J, Averell C, Eastman J. Prevalence, selected co-morbidities and systemic therapies in a U.S. Population-based cutaneous psoriasis cohort. *Pharmacoepidemiol Drug Saf*. 2013;22(SUPPL. 1):318. doi:<http://dx.doi.org/10.1002/pds.3512>
81. Reddy SP, Martires K, Wu JJ. The risk of melanoma and hematologic cancers in patients with psoriasis. *J Am Acad Dermatol*. 2017;76(4):639–647.e2. doi:10.1016/j.jaad.2016.09.047
82. Gelfand JM, Berlin J, Van Voorhees A, Margolis DJ. Lymphoma Rates Are Low but Increased in Patients With Psoriasis. *Arch Dermatol*. 2003;139(11). doi:10.1001/archderm.139.11.1425
83. Gelfand JM, Shin DB, Neimann AL, Wang X, Margolis DJ, Troxel AB. The risk of lymphoma in patients with psoriasis. *J Invest Dermatol*. 2006;126(10):2194–2201. doi:10.1038/sj.jid.5700410
84. Stern RS. Lymphoma Risk in Psoriasis. *Arch Dermatol*. 2006;142(9). doi:10.1001/archderm.142.9.1132
85. Stern RS, Väkevä LH, Bauer E, et al. Noncutaneous malignant tumors in the PUVA follow-up study: 1975–1996. *J Invest Dermatol*. 1997;108(6):897–900. doi:<http://dx.doi.org/10.1111/1523–1747.ep12292698>
86. Roelofzen JHJ, Aben KKH, Oldenhof UTH, et al. No Increased Risk of Cancer after Coal Tar Treatment in Patients with Psoriasis or Eczema. *J Invest Dermatol*. 2009;130(4):953–961. doi:10.1038/jid.2009.389
87. Fallah M, Liu X, Ji J, Försti A, Sundquist K, Hemminki K. Autoimmune diseases associated with non-Hodgkin lymphoma: a nationwide cohort study. *Ann Oncol*. 2014;25(10):2025–2030. doi:10.1093/annonc/mdu365
88. Fallah M, Liu X, Ji J, Försti A, Sundquist K, Hemminki K. Hodgkin lymphoma after autoimmune diseases by age at diagnosis and histological subtype. *Ann Oncol*. 2014;25(7):1397–1404. doi:10.1093/annonc/mdu144
89. Kamstrup MR, Skov L, Zachariae C, Thyssen JP, Egeberg A. Psoriasis and risk of malignant lymphoma: a population-based cohort study. *Br J Dermatol*. 2018;178(6):1435–1436. doi:10.1111/bjd.16245
90. Olsen JH, Moller H, Frenzt G, Møller H, Frenzt G. Malignant tumors in patients with psoriasis. *J Am Acad Dermatol*. 1992;27(5):716–722. doi:10.1016/0190–9622(92)70244–A
91. Laws PM, Downs AM, Parslew R, et al. Practical experience of ustekinumab in the treatment of psoriasis: Experience from a multicentre, retrospective case cohort study across the U.K. and Ireland. *Br J Dermatol*. 2012;166(1):189–195. doi:10.1111/j.1365–2133.2011.10638.x

92. Stern RS, Väkevä LH, Bauer E, et al. Noncutaneous malignant tumors in the PUVA follow-up study: 1975–1996. *J Invest Dermatol.* 1997;108(6):897–900. doi:10.1111/1523-1747.ep12292698
93. Chen YJ, Wu CY, Chen TJ, et al. The risk of cancer in patients with psoriasis: A population-based cohort study in Taiwan. *J Am Acad Dermatol.* 2011;65(1):84–91. doi:10.1016/j.jaad.2010.04.046
94. Hemminki K, Liu X, Ji J, Försti A, Sundquist J, Sundquist K. Effect of autoimmune diseases on risk and survival in female cancers. *Gynecol Oncol.* 2012;127(1):180–185. doi:10.1016/j.ygyno.2012.07.100
95. Stern RS, Lange R, Members of the Photochemotherapy Follow-up Study. Cardiovascular disease, cancer, and cause of death in patients with psoriasis: 10 years prospective experience in a cohort of 1,380 patients. *J Invest Dermatol.* 1988;91(3):197–201. doi:10.1111/1523-1747.ep12464847
96. Hemminki K, Liu X, Ji J, Sundquist J, Sundquist K. Autoimmune disease and subsequent digestive tract cancer by histology. *Ann Oncol.* 2012;23(4):927–933. doi:10.1093/annonc/mdr333
97. Liu X, Ji J, Forsti A, Sundquist K, Sundquist J, Hemminki K. Autoimmune Disease and Subsequent Urological Cancer. *J Urol.* 2012;189(6):2262–2268. doi:10.1016/j.juro.2012.12.014
98. Papp K, Gottlieb AB, Naldi L, et al. Safety Surveillance for Ustekinumab and Other Psoriasis Treatments From the Psoriasis Longitudinal Assessment and Registry (PSOLAR). *J Drugs Dermatol.* 2015;14(7):706–714. <http://www.ncbi.nlm.nih.gov/pubmed/26151787>.
99. Egeberg A, Ottosen MB, Gniadecki R, et al. Safety, efficacy and drug survival of biologics and biosimilars for moderate-to-severe plaque psoriasis. *Br J Dermatol.* 2018;178(2):509–519. doi:http://dx.doi.org/10.1111/bjd.16102
100. Rohekar S, Tom BDMM, Hassa A, Schentag CT, Farewell VT, Gladman DD. Prevalence of malignancy in psoriatic arthritis. *Arthritis Rheum.* 2008;58(1):82–87. doi:10.1002/art.23185
101. Wade RL, Kindermann SL, Hou Q. Population Characteristics, Treatment Patterns and Medical Events in Patients with Psoriatic Arthritis. *Pharmacoepidemiol Drug Saf.* 2013;22(1, SI):441.
102. Gross RL, Schwartzman-Morris JS, Krathen M, et al. A comparison of the malignancy incidence among patients with psoriatic arthritis and patients with rheumatoid arthritis in a large us cohort. *Arthritis Rheumatol.* 2014;66(6):1472–1481. doi:http://dx.doi.org/10.1002/art.38385
103. Mahboubia J, Amira M, Mongi T, et al. Comorbidities in Patients with Psoriatic Arthritis. *Clin Exp Rheumatol.* 2014;32(4, 83):S51.
104. Fagerli KM, Mercer LK, Watson KD, Packham J, Symmons DPM. Risk of cancer in patients with severe psoriatic arthritis requiring tumour-necrosis factor alpha inhibition. 2015;85(April):101–102.
105. Hagiwara K, Suyama Y, Fukuda K. Clinical experience in 115 patients with arthritis and/or enthesitis who met the classification criteria for

- psoriatic arthritis (CASPAR) within the last two years—Possible association with malignant disorders. *Mod Rheumatol*. 2016;26(4):625–629. doi:10.3109/14397595.2015.1097000
106. de Vlam K, Boone C. Treatment adherence, efficacy, and safety of etanercept in patients with active psoriatic arthritis and peripheral involvement in Belgium for 66 months (PROVE study). *Clin Exp Rheumatol*. 2015;33(5):624–631. <http://www.clinexprheumatol.org/article.asp?a=8597>.
  107. Chiricozzi A, Zangrilli A, Bavetta M, Bianchi L, Chimenti S, Saraceno R. Real-life 9-year experience with adalimumab in psoriasis and psoriatic arthritis: results of a single-centre, retrospective study. *J Eur Acad Dermatology Venereol*. 2017;31(2):304–311. doi:10.1111/jdv.13771
  108. Costa L, Caso F, Del Puente A, Di Minno MND, Peluso R, Scarpa R. Incidence of malignancies in a cohort of psoriatic arthritis patients taking traditional disease modifying antirheumatic drug and tumor necrosis factor inhibitor therapy: An observational study. *J Rheumatol*. 2016;43(12):2149–2154. doi:10.3899/jrheum.160542
  109. Hagberg KW, Li L, Peng M, Paris M, Shah K, Jick SS. Rates of Cancers and Opportunistic Infections in Patients with Psoriatic Arthritis Compared with Patients Without Psoriatic Arthritis. *J Clin Rheumatol*. 2016;22(5):241–247. doi:10.1097/RHU.0000000000000364
  110. Hellgren K, Dreyer L, Arkema E V., et al. Cancer risk in patients with spondyloarthritis treated with TNF inhibitors: A collaborative study from the ARTIS and DANBIO registers. *Ann Rheum Dis*. 2017;76(1):105–111. doi:10.1136/annrheumdis-2016-209270
  111. Wilton KM, Crowson CS, Matteson EL. Malignancy incidence in patients with psoriatic arthritis: a comparison cohort-based incidence study. *Clin Rheumatol*. 2016;35(10):2603–2607. doi:10.1007/s10067-016-3396-5
  112. Mease PJ, Litman HJ, Accortt NA, et al. Disease activity and patient characteristics by comorbidity among psoriatic arthritis (PSA) patients in a us registry. 2019;(June):379.2–380. doi:10.1136/annrheumdis-2018-eular.1275
  113. Lange E, Blizzard L, Venn A, et al. Disease-modifying anti-rheumatic drugs and non-melanoma skin cancer in inflammatory arthritis patients: A retrospective cohort study. *Rheumatol (United Kingdom)*. 2016;55(9):1594–1600. doi:http://dx.doi.org/10.1093/rheumatology/kew214
  114. Carmona L, Abasolo L, Descalzo MA, et al. Cancer in Patients with Rheumatic Diseases Exposed to TNF Antagonists. *Semin Arthritis Rheum*. 2011;41(1):71–80. doi:10.1016/j.semarthrit.2010.08.005

**eTable 3 – Egger bias of prevalence according to different cancer types**

| Group                                | Number of studies | Number of patients | Egger bias (95% CI) | P-value |
|--------------------------------------|-------------------|--------------------|---------------------|---------|
| Cancer overall                       | 41                | 1,214,030          | 4.32 (1.09–7.55)    | 0.0101  |
| Cancer excluding keratinocyte cancer | 41                | 373,597            | 3.06 (0.15–6.27)    | 0.0614  |
| keratinocyte cancer                  | 48                | 374,895            | 4.29 (1.31–7.28)    | 0.0057  |
| Melanoma                             | 31                | 519,267            | 2.42 (0.55–4.28)    | 0.013   |
| Lymphoma overall                     | 28                | 1,598,836          | 2.94 (1.26–4.62)    | 0.0013  |
| Non-Hodgkin’s lymphoma               | 13                | 395,213            | 2.13 (–0.39–4.66)   | 0.0901  |
| Hodgkin’s lymphoma                   | 8                 | 376,984            | 0.92 (–0.51–2.35)   | 0.1651  |
| Breast cancer                        | 26                | 613,429            | 3.56 (1.19–5.92)    | 0.0048  |
| Lung cancer                          | 29                | 825,435            | 2.27 (–0.31–4.86)   | 0.0824  |
| Colon cancer                         | 19                | 362,314            | 1.84 (–0.15–3.83)   | 0.0676  |
| Rectal cancer                        | 8                 | 135,220            | 1.63 (–0.96–4.21)   | 0.1743  |
| Colorectal cancer                    | 13                | 1,077,432          | 0.92 (–3.06–4.90)   | 0.6211  |
| Bladder cancer                       | 18                | 959,642            | 1.92 (0.68–3.16)    | 0.0047  |
| Biologics – Cancer overall           | 14                | 22,422             | 1.21 (–1.46–3.87)   | 0.343   |

|                                                  |    |        |                    |        |
|--------------------------------------------------|----|--------|--------------------|--------|
| Biologics – Cancer excluding keratinocyte cancer | 13 | 32,558 | 1.39 (–1.43–4.20)  | 0.3017 |
| Biologics – Keratinocyte cancer                  | 13 | 30,966 | 1.17 (–1.42–3.75)  | 0.342  |
| Biologics – Lymphoma overall                     | 8  | 21,701 | 0.91 (–0.24–2.06)  | 0.1009 |
| PsA – Cancer overall                             | 13 | 39,608 | 3.13 (–3.51–9.77)  | 0.3221 |
| PsA – Cancer excluding keratinocyte cancer       | 7  | 13,507 | 2.82 (–6.42–12.06) | 0.4682 |
| PsA – Keratinocyte cancer                        | 9  | 23,096 | 4.67 (–1.94–11.28) | 0.1385 |
| PsA – Melanoma                                   | 6  | 32,408 | 0.89 (–1.22–3.00)  | 0.3063 |
| PsA – Lymphoma overall                           | 4  | 23,546 | 0.18 (–2.94–3.30)  | 0.826  |
| PsA – Breast cancer                              | 6  | 2,546  | 1.19 (–0.32–2.71)  | 0.094  |
| PsA – Lung cancer                                | 4  | 20,924 | 1.12 (–1.71–3.96)  | 0.2302 |
| PsA – Colorectal cancer                          | 7  | 24,234 | 0.31 (–1.74–2.35)  | 0.716  |

PsA = Psoriatic arthritis. Bio = Biological treatment.



**eTable 4 – Egger bias of incidence according to different cancer types**

| Group                                            | Number of studies | Patient years | Egger bias (95% CI) |        |
|--------------------------------------------------|-------------------|---------------|---------------------|--------|
| Cancer overall                                   | 17                | 4,637,131     | 6.95 (3.09–10.80)   | 0.0016 |
| Cancer excluding keratinocyte cancer             | 17                | 277,062       | 3.29 (0.75–5.83)    | 0.0147 |
| keratinocyte cancer                              | 19                | 198,191       | 7.51 (1.65–13.37)   | 0.0151 |
| Melanoma                                         | 18                | 2,819,678     | 0.72 (–1.15–2.59)   | 0.4273 |
| Lymphoma overall                                 | 13                | 7,946,421     | 4.11 (1.40–6.81)    | 0.006  |
| Non–Hodgkin’s lymphoma                           | 7                 | 2,096,160     | 1.49 (–0.91–3.89)   | 0.171  |
| Hodgkin’s lymphoma                               | 6                 | 2,045,729     | 1.31 (–1.46–4.07)   | 0.2604 |
| Breast cancer                                    | 15                | 2,898,716     | 7.44 (–3.22–18.11)  | 0.1247 |
| Lung cancer                                      | 13                | 6,650,880     | 2.77 (–1.10–6.64)   | 0.1438 |
| Colon cancer                                     | 11                | 2,259,188     | 0.90 (–1.07–2.86)   | 0.3299 |
| Rectal cancer                                    | 4                 | 922,621       | 1.51 (–0.15–3.18)   | 0.0597 |
| Colorectal cancer                                | 8                 | 5,540,749     | 1.89 (–7.01–3.24)   | 0.4029 |
| Bladder cancer                                   | 7                 | 939,408       | 2.23 (–0.50–4.95)   | 0.0894 |
| Biologics – Cancer overall                       | 6                 | 45,005        | 1.81 (–3.94–7.55)   | 0.4317 |
| Biologics – Cancer excluding keratinocyte cancer | 4                 | 20,863        | –0.44 (–7.21–6.33)  | 0.8071 |

|                                            |   |        |                    |        |
|--------------------------------------------|---|--------|--------------------|--------|
| Biologics – Keratinocyte cancer            | 6 | 70,904 | 5.15 (–0.02–10.33) | 0.0507 |
| Biologics – Lymphoma overall               | 3 | 41,997 | –                  | –      |
| PsA – Cancer overall                       | 9 | 23,630 | 1.06 (–7.58–9.70)  | 0.7804 |
| PsA – Cancer excluding keratinocyte cancer | 5 | 13,091 | –2.04 (–8.80–4.73) | 0.4089 |
| PsA – Keratinocyte cancer                  | 6 | 22,620 | 7.31 (–5.18–19.80) | 0.1793 |
| PsA – Melanoma                             | 4 | 31,482 | 1.02 (–2.43–4.46)  | 0.3327 |
| PsA – Lymphoma overall                     | 3 | 23,329 | –                  | –      |
| PsA – Breast cancer                        | 4 | 2,375  | 1.94 (–2.20–6.09)  | 0.1811 |
| PsA – Lung cancer                          | 2 | 20,042 | –                  | –      |
| PsA – Colorectal cancer                    | 5 | 23,902 | 0.07 (–1.66–1.80)  | 0.9076 |

PsA = Psoriatic arthritis. Bio = Biological treatment.

**eTable 5 – Egger bias of risk estimates according to different cancer types**

| Group                                | Number of studies | Number of patients | Egger bias (95% CI)   | P-value |
|--------------------------------------|-------------------|--------------------|-----------------------|---------|
| Cancer overall                       | 14                | 1,147,009          | 2.32 (–1.15–5.79)     | 0.1715  |
| Cancer excluding keratinocyte cancer | 15                | 292,228            | 1.61 (–0.82–4.03)     | 0.1758  |
| keratinocyte cancer                  | 17                | 387,173            | 35.95 (–45.79–117.68) | 0.3634  |
| Melanoma                             | 16                | 456,924            | 0.33 (–0.92–1.57)     | 0.5833  |
| Lymphoma overall                     | 15                | 1,512,417          | 0.80 (–0.76–2.37)     | 0.2862  |
| Non-Hodgkin’s lymphoma               | 9                 | 377,594            | 0.32 (–1.81–2.46)     | 0.7316  |
| Hodgkin’s lymphoma                   | 6                 | 375,475            | –0.79 (–4.35–2.77)    | 0.5714  |
| Breast cancer                        | 13                | 582,645            | 1.11 (–0.06–2.27)     | 0.0611  |
| Lung cancer                          | 14                | 789,630            | 0.61 (–1.11–2.34)     | 0.4531  |
| Colon cancer                         | 13                | 341,673*           | 0.89 (–1.82–3.60)     | 0.4837  |
| Rectal cancer                        | 8                 | 135,163*           | 1.01 (–1.67–3.70)     | 0.391   |
| Colorectal cancer                    | 10                | 1,060,351*         | 1.82 (–0.96–4.60)     | 0.1689  |
| Bladder cancer                       | 9                 | 940,980            | 0.42 (–0.59–1.44)     | 0.3563  |
| Biologics – Cancer overall           | 3                 | 12,163**           | –                     | –       |

|                                                  |   |        |                     |        |
|--------------------------------------------------|---|--------|---------------------|--------|
| Biologics – Cancer excluding keratinocyte cancer | 6 | 25,430 | 0.08 (–2.74–2.90)   | 0.943  |
| Biologics – Keratinocyte cancer                  | 4 | 20,345 | 1.24 (–25.68–28.17) | 0.8609 |
| Biologics – Lymphoma overall                     | 3 | 14,673 | –                   | –      |
| PsA – Cancer overall                             | 6 | 32,979 | 0.35 (–1.42–2.12)   | 0.6124 |
| PsA – Cancer excluding keratinocyte cancer       | 3 | 11,680 | –                   | –      |
| PsA – Keratinocyte cancer                        | 6 | 20,786 | 0.23 (–4.62–5.08)   | 0.9012 |
| PsA – Melanoma                                   | 4 | 31,081 | 0.43 (–3.80–4.67)   | 0.7017 |
| PsA – Lymphoma overall                           | 3 | 22,928 | –                   | –      |
| PsA – Breast cancer                              | 3 | 1,611  | –                   | –      |
| PsA – Lung cancer                                | 3 | 20,623 | –                   | –      |
| PsA – Colorectal cancer                          | 4 | 23,200 | 1.02 (–0.17–2.21)   | 0.066  |

\*Includes a study by Hemminiki et al. (2011) which does not report number of patients with psoriasis.

\*\* Includes a study by Spehr et al. (2015) which does not report number of patients with psoriasis.

PsA = Psoriatic arthritis. Bio = Biological treatment.

**eTable 6 – Prevalence and quality assessment according to different cancer types – sensitivity analysis – year of publication**

| Group                                           | Number of studies | Number of patients | Prevalence, % (95% CI) | I <sup>2</sup> , % (95% CI) | Cochran Q                        |
|-------------------------------------------------|-------------------|--------------------|------------------------|-----------------------------|----------------------------------|
|                                                 |                   |                    |                        | Random effects              |                                  |
| Cancer overall, –1999                           | 11                | 19,046             | 5.81 (3.64–8.44)       | 97 (95.3–97.6)              | 338.39 (df = 10)<br>P < 0.0001   |
| Cancer overall, 2000–2009                       | 7                 | 24,983             | 4.60 (02.57–7.18)      | 96.8 (95.6–97.5)            | 188.21 (df = 6)<br>P < 0.0001    |
| Cancer overall, 2010–                           | 21                | 1,169,536          | 3.96 (3.11–4.90)       | 99.5 (99.5–99.5)            | 4,047.88 (df = 20)<br>P < 0.0001 |
| Cancer excluding keratinocyte cancer, –1999     | 13                | 37,532             | 5.28 (3.36–7.61)       | 98.3 (98–98.5)              | 695.39 (df = 12)<br>P < 0.0001   |
| Cancer excluding keratinocyte cancer, 2000–2009 | 7                 | 56,800             | 4.59 (2.29–7.64)       | 99.2 (99.1–99.3)            | 782.80 (df = 6)<br>P < 0.0001    |
| Cancer excluding keratinocyte cancer, 2010–     | 21                | 279,265            | 3.23 (2.39–4.19)       | 98.7 (98.6–98.8)            | 1,546.43 (df = 20)<br>P < 0.0001 |
| Keratinocyte cancer, –1999                      | 18                | 13,020             | 2.86 (1.98–3.89)       | 86.2 (79.7–89.9)            | 122.92 (df = 17)<br>P < 0.0001   |

|                                   |    |           |                  |                  |                                  |
|-----------------------------------|----|-----------|------------------|------------------|----------------------------------|
| Keratinocyte cancer, 2000–2009    | 5  | 7,247     | 2.28 (1.91–2.67) | 2.8 (0–65.1)     | 4.12 (df = 4)<br>P = 0.3904      |
| Keratinocyte cancer, 2010–        | 25 | 536,899   | 2.43 (1.79–3.16) | 99.5 (99.5–99.5) | 4,805.38 (df = 24)<br>P < 0.0001 |
| Melanoma, –1999                   | 6  | 34,964    | 0.21 (0.16–0.28) | 18.1 (0–67.7)    | 6.11 (df = 5)<br>P = 0.2959      |
| Melanoma, 2000–2009               | 8  | 60,364    | 0.35 (0.17–0.59) | 90.4 (83.7–93.5) | 72.70 (df = 7)<br>P < 0.0001     |
| Melanoma, 2010–                   | 17 | 423,939   | 0.33 (0.22–0.47) | 96.3 (95.5–96.9) | 437.14 (df = 16)<br>P < 0.0001   |
| Lymphoma overall, –1999           | 6  | 21,910    | 0.38 (0.08–0.89) | 70.6 (0–85.5)    | 16.98 (df = 5)<br>P = 0.0045     |
| Lymphoma overall, 2000–2009       | 7  | 202,309   | 0.40 (0.26–0.58) | 92.4 (87.3–94.8) | 78.47 (df = 6)<br>P < 0.0001     |
| Lymphoma overall, 2010–           | 15 | 1,374,617 | 0.19 (0.13–0.28) | 97.8 (97.4–98.1) | 639.42 (df = 14)<br>P < 0.0001   |
| Non-Hodgkin’s lymphoma, –1999     | 3  | 28,177    | 0.22 (0.03–0.62) | 94.1 (86.3–96.6) | 34.16 (df = 2)<br>P < 0.0001     |
| Non-Hodgkin’s lymphoma, 2000–2009 | 5  | 176,144   | 0.42 (0.19–0.73) | 94.5 (90.7–96.3) | 73.01 (df = 4)<br>P < 0.0001     |

|                               |    |         |                  |                  |                                  |
|-------------------------------|----|---------|------------------|------------------|----------------------------------|
| Non-Hodgkin's lymphoma, 2010– | 5  | 190,892 | 0.28 (0.19–0.38) | 80.7 (40.8–90.1) | 20.76 (df = 4)<br>P = 0.0004     |
| Hodgkin's lymphoma, –1999     | 2  | 27,238  | 0.02 (0.01–0.04) | 0 (/–/)          | 0.0 (df = 1)<br>P = 0.9616       |
| Hodgkin's lymphoma, 2000–2009 | 3  | 160,264 | 0.09 (0.01–0.24) | 85.7 (31.8–93.5) | 14.01 (df = 2)<br>P = 0.0009     |
| Hodgkin's lymphoma, 2010–     | 3  | 189,482 | 0.04 (0.02–0.07) | 78.3 (0–91.3)    | 9.22 (df = 2)<br>P = 0.0099      |
| Breast cancer, –1999          | 7  | 16,991  | 1.84 (1.10–2.76) | 88.1 (77.3–92.5) | 50.61 (df = 6)<br>P < 0.0001     |
| Breast cancer, 2000–2009      | 5  | 23,002  | 1.66 (0.63–3.17) | 95.7 (93.2–97)   | 93.82 (df = 4)<br>P < 0.0001     |
| Breast cancer, 2010–          | 14 | 573,436 | 1.51 (0.90–2.14) | 99 (98.9–99.1)   | 1,283.72 (df = 13)<br>P < 0.0001 |
| Lung cancer, –1999            | 11 | 20,748  | 0.98 (0.63–1.41) | 79.6 (61.4–87.1) | 49.02 (df = 10)<br>P < 0.0001    |
| Lung cancer, 2000–2009        | 7  | 61,092  | 0.94 (0.39–1.73) | 97.8 (97.1–98.2) | 271.12 (df = 6)<br>P < 0.0001    |
| Lung cancer, 2010–            | 11 | 743,595 | 0.75 (0.51–1.02) | 98.7 (98.4–98.8) | 746.72 (df = 10)<br>P < 0.0001   |
| Colon cancer, –1999           | 8  | 32,396  | 0.58 (0.24–1.08) | 92.9 (88.8–95)   | 97.92 (df = 7)                   |

|                              |   |         |                  |                  |                 |
|------------------------------|---|---------|------------------|------------------|-----------------|
|                              |   |         |                  |                  | P < 0.0001      |
| Colon cancer, 2000–2009      | 3 | 22,797  | 0.43 (0.30–0.58) | 46.1 (0–83.7)    | 3.71 (df = 2)   |
|                              |   |         |                  |                  | P = 0.1564      |
| Colon cancer, 2010–          | 8 | 307,121 | 0.75 (0.50–1.05) | 96.7 (95.6–97.4) | 212.98 (df = 7) |
|                              |   |         |                  |                  | P < 0.0001      |
| Rectal cancer, –1999         | 4 | 29,557  | 0.28 (0.10–0.55) | 87.2 (62.6–93.2) | 23.36 (df = 3)  |
|                              |   |         |                  |                  | P < 0.0001      |
| Rectal cancer, 2000–2009     | – | –       | –                | –                | –               |
| Rectal cancer, 2010–         | 3 | 89,805  | 0.25 (0.13–0.39) | 69.1 (0–88.9)    | 6.47 (df = 2)   |
|                              |   |         |                  |                  | P = 0.0394      |
| Colorectal cancer, –1999     | 4 | 29,557  | 0.82 (0.22–1.80) | 97.2 (95.7–98)   | 107.55 (df = 3) |
|                              |   |         |                  |                  | P < 0.0001      |
| Colorectal cancer, 2000–2009 | 2 | 49,618  | 0.50 (0.04–1.30) | 98.8 (/–/)       | 84.94 (df = 1)  |
|                              |   |         |                  |                  | P < 0.0001      |
| Colorectal cancer, 2010–     | 7 | 998,257 | 0.55 (0.40–0.72) | 95.2 (93–96.5)   | 125.69 (df = 6) |
|                              |   |         |                  |                  | P < 0.0001      |
| Bladder cancer, –1999        | 7 | 19,176  | 0.34 (0.22–0.48) | 36.8 (0–72.3)    | 9.50 (df = 6)   |
|                              |   |         |                  |                  | P = 0.1473      |
| Bladder cancer, 2000–2009    | 2 | 10,002  | 0.51 (0.38–0.66) | 0 (/–/)          | 0.97 (df = 1)   |
|                              |   |         |                  |                  | P = 0.325       |
| Bladder cancer, 2010–        | 9 | 930,464 | 0.29 (0.12–0.53) | 95.7 (94.1–96.7) | 184.78 (df = 8) |



P < 0.0001

**eTable 7 – Incidence and quality assessment according to different cancer types – sensitivity analysis – year of publication**

| Group                                           | Number of studies | Patient years | Incidence, per 1,000 PY (95% CI) | I <sup>2</sup> , % (95% CI) | Cochran Q                       |
|-------------------------------------------------|-------------------|---------------|----------------------------------|-----------------------------|---------------------------------|
| Random effects                                  |                   |               |                                  |                             |                                 |
| Cancer overall, –1999                           | 4                 | 81,146        | 9.04 (6.28–12.30)                | 88.9 (70.8–93.9)            | 27.12 (df = 3)<br>P < 0.0001    |
| Cancer overall, 2000–2009                       | 3                 | 121,994       | 12.02 (4.27–23.62)               | 99.4 (99.3–99.5)            | 363.08 (df = 2)<br>P < 0.0001   |
| Cancer overall, 2010–                           | 10                | 4,433,990     | 13.14 (8.43–18.86)               | 99.2 (99.1–99.3)            | 1,125.87 (df = 9)<br>P < 0.0001 |
| Cancer excluding keratinocyte cancer, –1999     | 5                 | 84,484        | 7.12 (4.47–10.60)                | 92.5 (85.9–95.3)            | 53.65 (df = 4)<br>P < 0.0001    |
| Cancer excluding keratinocyte cancer, 2000–2009 | 3                 | 240,855       | 5.53 (4.92–6.18)                 | 63 (0–87.4)                 | 5.40 (df = 2)<br>P = 0.0671     |
| Cancer excluding keratinocyte cancer, 2010–     | 9                 | 1,338,149     | 8.65 (6.58–11.00)                | 97.7 (97.1–98.1)            | 340.96 (df = 8)<br>P < 0.0001   |
| keratinocyte cancer, –1999                      | 5                 | 82,166        | 4.38 (2.55–6.69)                 | 88 (72.1–93.1)              | 33.33 (df = 4)<br>P < 0.0001    |

|                                   |    |           |                  |                  |                                  |
|-----------------------------------|----|-----------|------------------|------------------|----------------------------------|
| keratinocyte cancer, 2000–2009    | 2  | 81,992    | 3.03 (0.79–6.71) | 92.1 (/–/)       | 12.70 (df = 1)<br>P = 0.0004     |
| keratinocyte cancer, 2010–        | 12 | 2,501,550 | 4.52 (3.01–6.33) | 99.6 (99.6–99.7) | 3,039.53 (df = 11)<br>P < 0.0001 |
| Melanoma, –1999                   | 3  | 79,941    | 0.26 (0.16–0.38) | 0 (0–72.9)       | 0.03 (df = 2)<br>P = 0.9851      |
| Melanoma, 2000–2009               | 5  | 289,706   | 0.33 (0.14–0.60) | 88.3 (73.3–93.2) | 34.33 (df = 4)<br>P < 0.0001     |
| Melanoma, 2010–                   | 10 | 2,450,031 | 0.44 (0.33–0.56) | 89.4 (82.9–92.7) | 85.07 (df = 9)<br>P < 0.0001     |
| Lymphoma overall, –1999           | –  | –         | –                | –                | –                                |
| Lymphoma overall, 2000–2009       | 6  | 974,273   | 0.51 (0.36–0.68) | 81.3 (51.8–89.7) | 26.74 (df = 5)<br>P < 0.0001     |
| Lymphoma overall, 2010–           | 8  | 6,976,504 | 0.31 (0.19–0.44) | 98 (97.5–98.4)   | 355.21 (df = 7)<br>P < 0.0001    |
| Non–Hodgkin’s lymphoma, –1999     | –  | –         | –                | –                | –                                |
| Non–Hodgkin’s lymphoma, 2000–2009 | 3  | 801,466   | 0.31 (0.24–0.40) | 38.6 (0–82.1)    | 3.26 (df = 2)<br>P = 0.1961      |
| Non–Hodgkin’s lymphoma, 2010–     | 3  | 1,230,521 | 0.41 (0.27–0.57) | 88.6 (57.0–94.5) | 17.55 (df = 2)<br>P = 0.0002     |

|                               |   |           |                  |                  |                               |
|-------------------------------|---|-----------|------------------|------------------|-------------------------------|
| Hodgkin's lymphoma, –1999     | – | –         | –                | –                | –                             |
| Hodgkin's lymphoma, 2000–2009 | 3 | 801,614   | 0.07 (0.05–0.09) | 5.7 (0–74.4)     | 2.12 (df = 2)<br>P = 0.3464   |
| Hodgkin's lymphoma, 2010–     | 2 | 1,208,653 | 0.07 (0.02–0.15) | 92.7 (/–/)       | 13.69 (df = 1)<br>P = 0.0002  |
| Breast cancer, –1999          | – | –         | –                | –                | –                             |
| Breast cancer, 2000–2009      | 2 | 121,245   | 1.41 (0.77–2.25) | 90.3 (/–/)       | 10.30 (df = 1)<br>P = 0.0013  |
| Breast cancer, 2010–          | 4 | 2,777,471 | 2.47 (1.45–3.76) | 99.4 (99.3–99.5) | 525.17 (df = 3)<br>P < 0.0001 |
| Lung cancer, –1999            | 3 | 79,941    | 1.38 (0.62–2.43) | 83.3 (3.8–92.7)  | 12.00 (df = 2)<br>P = 0.0025  |
| Lung cancer, 2000–2009        | 3 | 240,923   | 0.80 (0.31–1.52) | 94.3 (87–96.7)   | 35.39 (df = 2)<br>P < 0.0001  |
| Lung cancer, 2010–            | 7 | 6,330,016 | 0.84 (0.59–1.12) | 98.2 (97.8–98.5) | 337.26 (df = 6)<br>P < 0.0001 |
| Colon cancer, –1999           | 4 | 93,165    | 0.75 (0.42–1.16) | 63.5 (0–85.5)    | 8.21 (df = 3)<br>P = 0–0419   |
| Colon cancer, 2000–2009       | 2 | 82,013    | 0.40 (0.09–0.93) | 57 (/–/)         | 2.32 (df = 1)<br>P = 0.1275   |

|                              |   |           |                  |                  |                              |
|------------------------------|---|-----------|------------------|------------------|------------------------------|
| Colon cancer, 2010–          | 5 | 2,084,010 | 0.58 (0.44–0.74) | 89.2 (76.3–93.7) | 37.16 (df = 4)<br>P < 0.0001 |
| Rectal cancer, –1999         | 2 | 77,397    | 0.40 (0.27–0.55) | 0 (/–/)          | 0.30 (df = 1)<br>P = 0.5838  |
| Rectal cancer, 2000–2009     | – | –         | –                | –                | –                            |
| Rectal cancer, 2010–         | 2 | 845,224   | 0.26 (0.23–0.30) | 6.6 (/–/)        | 1.07 (df = 1)<br>P = 0.3009  |
| Colorectal cancer, –1999     | 2 | 77,397    | 1.37 (1.12–1.64) | 0 (/–/)          | 0.71 (df = 1)<br>P = 0.3982  |
| Colorectal cancer, 2000–2009 | – | –         | –                | –                | –                            |
| Colorectal cancer, 2010–     | 5 | 5,304,446 | 0.73 (0.58–0.89) | 92.6 (86–95.3)   | 53.73 (df = 4)<br>P < 0.0001 |
| Bladder cancer, –1999        | 2 | 74,719    | 0.42 (0.17–0.77) | 55.4 (/–/)       | 2.24 (df = 1)<br>P = 0.1342  |
| Bladder cancer, 2000–2009    | – | –         | –                | –                | –                            |
| Bladder cancer, 2010–        | 4 | 4,747,307 | 0.26 (0.13–0.43) | 94.1 (88.6–96.3) | 50.82 (df = 3)<br>P < 0.0001 |

**eTable 8 – Risk estimates and quality assessment according to different cancer types – sensitivity analysis – year of publication**

| Group                                           | Number of studies | Number of patients | Risk ratio (95% CI)<br>Random effects | I <sup>2</sup> , % (95% CI) | Cochran Q                     |
|-------------------------------------------------|-------------------|--------------------|---------------------------------------|-----------------------------|-------------------------------|
| Cancer overall, <1999                           | 7                 | 18,323             | 1.10 (0.87–1.40)                      | 89.8 (81.4–93.4)            | 58.58 (df = 6)<br>P < 0.0001  |
| Cancer overall, 2000–2009                       | 3                 | 24,559             | 1.45 (1.15–1.84)                      | 83.7 (8.5–92.8)             | 12.27 (df = 2)<br>P = 0.0022  |
| Cancer overall, 2010–                           | 4                 | 1,104,127          | 1.15 (1.01–1.30)                      | 98.3 (97.6–98.7)            | 174.90 (df = 3)<br>P < 0.0001 |
| Cancer excluding keratinocyte cancer, <1999     | 7                 | 12,806             | 1.11 (0.97–1.27)                      | 77.1 (41.5–87.4)            | 26.24 (df = 6)<br>P = 0.0002  |
| Cancer excluding keratinocyte cancer, 2000–2009 | 3                 | 49,681             | 1.22 (1.08–1.39)                      | 68.5 (0–88.7)               | 6.35 (df = 2)<br>P = 0.0417   |
| Cancer excluding keratinocyte cancer, 2010–     | 5                 | 208,307            | 1.13 (0.96–1.33)                      | 84.8 (59.8–91.7)            | 26.32 (df = 4)<br>P < 0.0001  |
| keratinocyte cancer, <1999                      | 6                 | 9,897              | 3.00 (2.40–3.74)                      | 69.2 (0–84.9)               | 16.21 (df = 5)<br>P = 0.0063  |
| keratinocyte cancer, 2000–2009                  | 2                 | 6,939              | 3.08 (0.81–11.75)                     | 97.4 (/–/)                  | 37.99 (df = 1)                |

|                                   |   |           |                  |                  |                                   |
|-----------------------------------|---|-----------|------------------|------------------|-----------------------------------|
|                                   |   |           |                  |                  | P < 0.0001                        |
| keratinocyte cancer, 2010–        | 9 | 365,337   | 1.90 (1.32–2.73) | 100 (0–infinity) | 302,651.13 (df = 8)<br>P < 0.0001 |
| Melanoma, –1999                   | 5 | 34,704    | 1.15 (0.90–1.45) | 0 (0–64.1)       | 0.44 (df = 4)<br>P = 0.9787       |
| Melanoma, 2000–2009               | 5 | 58,687    | 0.98 (0.71–1.35) | 29.7 (0–73.8)    | 5.69 (df = 4)<br>P = 0.2236       |
| Melanoma, 2010–                   | 6 | 363,533   | 1.19 (0.98–1.45) | 78.3 (39.1–88.5) | 23.04 (df = 5)<br>P = 0.0003      |
| Lymphoma overall, –1999           | 2 | 21,047    | 0.80 (0.42–1.50) | 11.6 (/–/)       | 1.13 (df = 1)<br>P = 0.2876       |
| Lymphoma overall, 2000–2009       | 7 | 202,309   | 1.89 (1.51–2.36) | 44.7 (0–75.1)    | 10.86 (df = 6)<br>P = 0.0928      |
| Lymphoma overall, 2010–           | 6 | 1,289,061 | 1.44 (1.24–1.66) | 75.7 (27.1–87.4) | 20.60 (df = 5)<br>P = 0.001       |
| Non–Hodgkin’s lymphoma, –1999     | 3 | 28,177    | 1.58 (0.71–3.52) | 76.4 (0–90.8)    | 8.48 (df = 2)<br>P = 0.0121       |
| Non–Hodgkin’s lymphoma, 2000–2009 | 3 | 174,742   | 1.52 (1.23–1.88) | 52.4 (0–85)      | 4.20 (df = 2)<br>P = 0.1224       |
| Non–Hodgkin’s lymphoma, 2010–     | 3 | 190,488   | 1.45 (1.26–1.66) | 31 (0–80.4)      | 2.90 (df = 2)<br>P = 0.2349       |

|                               |   |         |                  |                  |                              |
|-------------------------------|---|---------|------------------|------------------|------------------------------|
| Hodgkin's lymphoma, –1999     | 2 | 27,238  | 0.73 (0.30–1.74) | 0 (/–/)          | 0.13 (df = 1)<br>P = 0.702   |
| Hodgkin's lymphoma, 2000–2009 | 2 | 158,884 | 2.16 (1.09–4.29) | 69.4 (/–/)       | 3.26 (df = 1)<br>P = 0.0708  |
| Hodgkin's lymphoma, 2010–     | 2 | 189,353 | 2.05 (1.60–2.63) | 0 (/–/)          | 0.48 (df = 1)<br>P = 0.4865  |
| Breast cancer, –1999          | 4 | 16,132  | 1.19 (0.92–1.55) | 61.7 (0–85)      | 7.84 (df = 3)<br>P = 0.0495  |
| Breast cancer, 2000–2009      | 4 | 22,954  | 1.14 (0.87–1.50) | 58.5 (0–84.1)    | 7.22 (df = 3)<br>P = 0.0651  |
| Breast cancer, 2010–          | 5 | 543,559 | 1.02 (0.95–1.09) | 50.5 (0–80)      | 8.07 (df = 4)<br>P = 0.0889  |
| Lung cancer, –1999            | 3 | 17,048  | 1.21 (0.85–1.72) | 80.3 (0–91.8)    | 10.17 (df = 2)<br>P = 0.0062 |
| Lung cancer, 2000–2009        | 6 | 60,935  | 1.24 (0.91–1.70) | 82.3 (55.9–90.2) | 28.30 (df = 5)<br>P < 0.0001 |
| Lung cancer, 2010–            | 5 | 712,366 | 1.19 (1.11–1.26) | 33.5 (0–74.9)    | 6.01 (df = 4)<br>P = 0.1983  |
| Colon cancer, –1999           | 5 | 31,295  | 1.14 (0.76–1.73) | 66.5 (0–85)      | 11.93 (df = 4)<br>P = 0.0179 |
| Colon cancer, 2000–2009       | 3 | 22,797  | 1.02 (0.85–1.24) | 0 (0–72.9)       | 1.88 (df = 2)                |

|                              |   |          |                  |                  |                |            |
|------------------------------|---|----------|------------------|------------------|----------------|------------|
|                              |   |          |                  |                  |                | P = 0.3899 |
| Colon cancer, 2010–          | 5 | 288,833* | 1.29 (0.92–1.82) | 94.4 (90.4–96.3) | 71.38 (df = 4) |            |
|                              |   |          |                  |                  |                | P < 0.0001 |
| Rectal cancer, –1999         | 4 | 29,557   | 0.99 (0.76–1.30) | 0 (0–67.9)       | 2.22 (df = 3)  |            |
|                              |   |          |                  |                  |                | P = 0.5288 |
| Rectal cancer, 2000–2009     | – | –        | –                | –                | –              |            |
| Rectal cancer, 2010–         | 3 | 89,748*  | 1.03 (0.75–1.41) | 75.3 (0–90.5)    | 8.10 (df = 2)  |            |
|                              |   |          |                  |                  |                | P = 0.0174 |
| Colorectal cancer, –1999     | 3 | 28,613   | 1.17 (0.76–1.79) | 83.2 (1.4–92.7)  | 11.88 (df = 2) |            |
|                              |   |          |                  |                  |                | P = 0.0026 |
| Colorectal cancer, 2000–2009 | 2 | 49,618   | 1.15 (0.94–1.39) | 23.3 (/–/)       | 1.30 (df = 1)  |            |
|                              |   |          |                  |                  |                | P = 0.2535 |
| Colorectal cancer, 2010–     | 5 | 982,120* | 1.15 (0.90–1.47) | 93.8 (89.1–95.9) | 64.86 (df = 4) |            |
|                              |   |          |                  |                  |                | P < 0.0001 |
| Bladder cancer, –1999        | 4 | 17,992   | 1.03 (0.80–1.33) | 0 (0–67.9)       | 0.57 (df = 3)  |            |
|                              |   |          |                  |                  |                | P = 0.9041 |
| Bladder cancer, 2000–2009    | 2 | 10,002   | 1.46 (1.07–1.99) | 0 (/–/)          | 0.11 (df = 1)  |            |
|                              |   |          |                  |                  |                | P = 0.7443 |
| Bladder cancer, 2010–        | 3 | 912,986  | 1.14 (1.00–1.29) | 31.7 (0–80.6)    | 2.93 (df = 2)  |            |
|                              |   |          |                  |                  |                | P = 0.2311 |

\*Includes a study by Hemminiki et al. (2011) which does not report number of patients with psoriasis.



**eTable 9 – Risk estimates and quality assessment according to different cancer types – sensitivity analysis – high quality**

| Group                                | Number of studies | Number of patients | Risk ratio (95% CI)<br>Random effects | I <sup>2</sup> , % (95% CI) | Cochran Q                         |
|--------------------------------------|-------------------|--------------------|---------------------------------------|-----------------------------|-----------------------------------|
| Cancer overall                       | 5                 | 1,121,942          | 1.12 (1.01–1.25)                      | 97.6 (96.7–98.2)            | 168.38 (df = 4)<br>P < 0.0001     |
| Cancer excluding keratinocyte cancer | 5                 | 249,923            | 1.14 (0.97–1.33)                      | 95.9 (93.6–97.1)            | 98.04 (df = 4)<br>P = 0.0012      |
| keratinocyte cancer                  | 7                 | 362,864            | 1.94 (1.31–2.86)                      | 100 (100–100)               | 302,647.09 (df = 6)<br>P < 0.0001 |
| Melanoma                             | 10                | 420,968            | 1.11 (0.94–1.30)                      | 66.4 (19–81.2)              | 26.77 (df = 9)<br>P = 0.0015      |
| Lymphoma overall                     | 11                | 1,484,545          | 1.63 (1.43–1.86)                      | 74.8 (48.6–84.7)            | 39.67 (df = 10)<br>P < 0.0001     |
| Non-Hodgkin’s lymphoma               | 6                 | 365,230            | 1.47 (1.32–1.62)                      | 30.5 (0–71.8)               | 7.19 (df = 5)<br>P = 0.2066       |
| Hodgkin’s lymphoma                   | 5                 | 355,147            | 1.97 (1.61–2.433)                     | 10.1 (0–67.6)               | 4.45 (df = 4)<br>P = 0.3483       |
| Breast cancer                        | 8                 | 564,528            | 1.04 (0.96–1.13)                      | 60.4 (0–79.9)               | 17.69 (df = 7)                    |

|                   |   |            |                  |                  |                |
|-------------------|---|------------|------------------|------------------|----------------|
|                   |   |            |                  |                  | P = 0.0134     |
| Lung cancer       | 8 | 767,671    | 1.29 (1.13–1.46) | 84 (67.8–90.2)   | 43.67 (df = 7) |
|                   |   |            |                  |                  | P < 0.0001     |
| Colon cancer      | 8 | 310,378*   | 1.26 (0.80–1.62) | 91.1 (85.2–9.9)  | 78.46 (df = 7) |
|                   |   |            |                  |                  | P < 0.0001     |
| Rectal cancer     | 5 | 106,986*   | 1.09 (0.87–1.38) | 63.3 (0–84)      | 10.91 (df = 4) |
|                   |   |            |                  |                  | P = 0.0276     |
| Colorectal cancer | 8 | 1,033,118* | 1.21 (1.01–1.46) | 90.9 (85.0–93.8) | 77.30 (df = 7) |
|                   |   |            |                  |                  | P < 0.0001     |
| Bladder cancer    | 4 | 918,673    | 1.16 (1.03–1.32) | 29.7 (0.0–76.5)  | 4.27 (df = 3)  |
|                   |   |            |                  |                  | P = 0.2339     |

\*Includes a study by Hemminiki et al. (2011) which does not report number of patients with psoriasis.
